# Supplementary material for: Asymmetric synthesis of bicyclic dihydropyrans via organocatalytic inverse-electron-demand oxo-Diels–Alder reactions of enolizable aliphatic aldehydes
Source: Royal Society of Chemistry journal article supplement (doi:10.1039/c6cc05001h), 2016-01-01

# Asymmetric Synthesis of Bicyclic Dihydropyrans *via* Organocatalytic Inverse-Electron-Demand oxo-Diels-Alder Reactions of Enolizable Aliphatic Aldehydes

Jun-Long Li,<sup>a</sup> Kai-Chuan Yang,<sup>\*a,c</sup> Yi Li,<sup>a</sup> Qiang Li,<sup>a</sup> Hong-Ping Zhu,<sup>a</sup> Bo Han,<sup>b</sup> Cheng Peng<sup>\*b</sup>  
Yong-Gang Zhi<sup>c</sup> and Xiao-Jun Gou<sup>\*a</sup>

<sup>a</sup> Antibiotics Research and Re-evaluation Key Laboratory of Sichuan Province, Sichuan Industrial Institute of Antibiotics, Chengdu University, Chengdu 610052, PR China. E-mail: Kaichuan yang@163.com; gouxj@163.com

<sup>b</sup> State Key Laboratory Breeding Base of Systematic Research, Development and Utilization of Chinese Medicine Resources, Chengdu University of Traditional Chinese Medicine, Chengdu 611137, China. E-mail: pengcheng@cdutcm.edu.cn

<sup>c</sup> Chengdu Institute of Organic Chemistry, Chinese Academy of Sciences, Chengdu 610041, China.

## Supporting Information

### Table of Contents

1. General Information
2. Optimization Study of the Asymmetric oxo-IEDDA Reactions of Aldehyde **1a** and the Cyclic Enone **2a**
3. General Procedure for the Synthesis of Chiral Bicyclic Dihydropyrans **4** by using Normal Saturated Aldehydes
4. General Procedure for the Synthesis of Chiral Bicyclic Dihydropyrans **6** and **6'** by directly using Aqueous Acetaldehyde
5. Procedure for Synthetic Transformations of **4a**
6. Crystal Data and Structure Refinement for the Enantiopure **4b**
7. References and Notes
8. NMR and HPLC Spectra of the Chiral Bicyclic Dihydropyrans

## 1. General Information

**General Procedures.** All reactions were performed in oven-dried or flame-dried reaction vessels, modified Schlenk flasks, or round-bottom flasks. The flasks were fitted with Teflon screw caps and reactions were conducted under an atmosphere of argon if needed. Gas-tight syringes with stainless steel needles were used to transfer air- and moisture-sensitive liquids. All moisture and/or air sensitive solid compounds were manipulated inside normal desiccators. Flash column chromatography was performed using silica gel (40–63  $\mu\text{m}$ , 230–400 mesh).

Analytical thin layer chromatography (TLC) was performed on silica gel 60 F<sub>254</sub> aluminum plates (Merck) containing a 254 nm fluorescent indicator. TLC plates were visualized by exposure to short wave ultraviolet light (254 nm) and to a solution of  $\text{KMnO}_4$  (1 g of  $\text{KMnO}_4$ , 6 g of  $\text{K}_2\text{CO}_3$  and 0.1 g of  $\text{KOH}$  in 100 mL of  $\text{H}_2\text{O}$ ) or vanillin (2 g of vanillin and 4 mL of concentrated  $\text{H}_2\text{SO}_4$  in 100 mL of  $\text{EtOH}$ ) followed by heating.

Organic solutions were concentrated at 30–50  $^\circ\text{C}$  on rotary evaporators at  $\sim 10$  torr followed by drying on vacuum pump at  $\sim 1$  torr. Reaction temperatures are reported as the temperature of the bath surrounding the vessel unless otherwise stated.

**Materials.** Commercial reagents and solvents were obtained from Adamas-beta, Aldrich Chemical Co., Alfa Aesar, Macklin and Energy Chemical and used as received with the following exceptions: THF,  $\text{Et}_2\text{O}$  and toluene were purified by refluxing over Na-benzophenone under positive argon pressure followed by distillation.<sup>[1]</sup> The enone substrates were prepared according to literature procedure.<sup>[2]</sup>

### Instrumentation.

- Proton nuclear magnetic resonance ( $^1\text{H}$  NMR) spectra were recorded with Bruker AV 400 MHz spectrometers. Proton chemical shifts are reported in parts per million ( $\delta$  scale), and are referenced using residual protium in the NMR solvent ( $\text{CDCl}_3$ :  $\delta$  7.26 ( $\text{CHCl}_3$ )). Data are reported as follows: chemical shift [multiplicity (s = singlet, d = doublet, t = triplet, q = quartet, m = multiplet, br s = broad singlet), coupling constant(s) (Hz), integration].
- Carbon-13 nuclear magnetic resonance ( $^{13}\text{C}$  NMR) spectra were recorded with Bruker AV 400 MHz spectrometers. Carbon chemical shifts are reported in parts per million ( $\delta$  scale), and are referenced using the carbon resonances of the solvent ( $\delta$  77.0 ( $\text{CHCl}_3$ )). Data are reported as follows: chemical shift [multiplicity (if not singlet), assignment ( $\text{C}_q$  = fully substituted carbon)].
- High resolution mass spectra (HRMS) were recorded on a Waters SYNAPT G2 using an electrospray (ESI) ionization source.

## 2. Optimization Study of the Asymmetric *oxo*-IEDDA Reactions of Aldehyde **1a** and the Cyclic Enone **2a**<sup>a</sup>

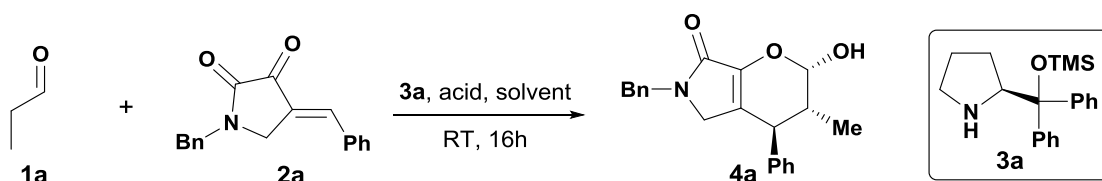

| Entry           | Solvent                                    | Acid <sup>b</sup> | yield[%] <sup>c</sup> | ee [%] <sup>d</sup> |
|-----------------|--------------------------------------------|-------------------|-----------------------|---------------------|
| 1               | DCM                                        | BA                | 70                    | 98                  |
| 2               | THF                                        | BA                | 40                    | >99                 |
| 3               | CH <sub>3</sub> CN                         | BA                | 30                    | 96                  |
| 4               | Toluene                                    | BA                | 20                    | 99                  |
| 5               | 1,4-dioxane                                | BA                | 82                    | >99                 |
| 6               | Chloroform                                 | BA                | 64                    | 99                  |
| <b>7</b>        | <b>THF:H<sub>2</sub>O (10:1)</b>           | <b>BA</b>         | <b>90</b>             | <b>&gt;99</b>       |
| 8               | CH <sub>3</sub> CN:H <sub>2</sub> O (10:1) | BA                | 75                    | 98                  |
| 9               | 1,4-dioxane:H <sub>2</sub> O (10:1)        | BA                | 80                    | >99                 |
| 10              | THF:H <sub>2</sub> O (10:1)                | None              | N.D                   | trace               |
| 11              | THF:H <sub>2</sub> O (10:1)                | PNBA              | 92                    | 97                  |
| 12              | THF:H <sub>2</sub> O (10:1)                | ONBA              | 81                    | 99                  |
| 13              | THF:H <sub>2</sub> O (10:1)                | SA                | 80                    | 99                  |
| 14              | THF:H <sub>2</sub> O (10:1)                | AA                | 78                    | 99                  |
| 15 <sup>e</sup> | THF:H <sub>2</sub> O (10:1)                | BA                | 70                    | >99                 |
| 16 <sup>f</sup> | THF:H <sub>2</sub> O (10:1)                | BA                | 82                    | 99                  |

<sup>a</sup> Unless otherwise noted, the title reactions were performed with 0.15 mmol of **1a**, 0.1 mmol of **2a**, 0.02 mmol of **3a** and 0.02 mmol of the acid in 1 mL of the solvent for 16 hours; and the dr value of this reaction was generally >95:5 which was determined by <sup>1</sup>H-NMR analysis of the crude product. <sup>b</sup> BA: Benzoic acid; PNBA: *p*-Nitrobenzoic acid; ONBA: *o*-Nitrobenzoic acid; SA: Salicylic acid; AA: Acetic acid. <sup>c</sup> Isolated yield. <sup>d</sup> Determined by chiral HPLC analysis. <sup>e</sup> Reaction was performed in 0.5 ml of the solvent. <sup>f</sup> Reaction was performed in 2 ml of the solvent.

We firstly screened the solvent for the secondary amine catalyzed asymmetric *oxo*-IEDDA reaction of *n*-propanal **1a** and the cyclic enone **2a** under room temperature. As summarized in the above table (entries 1-9), the co-solvent of THF/H<sub>2</sub>O (10:1) has demonstrated to be the optimal choice. Then, various kinds of acid additives including benzoic acid, *p*-nitrobenzoic acid, *o*-nitrobenzoic acid, salicylic acid and acetic acid, were also investigated (entries 10-14). Regarding the isolated yield, enantioselectivity as well as the cost of the material, we chose benzoic acid as the best additive for this reaction; it is noteworthy that no reaction happened in the absence of acid (entry 10). Finally, we studied the concentration of this reaction; however, lower yield was obtained by either increasing or reducing the amount of the solvent (entries 15-16). Thus, the desired product **4a** could be obtained in high yield (90% yield) and with excellent stereoselectivity (>95:5 dr, >99% ee) under the optimal condition (entry 7).

### 3. General Procedure for the Synthesis of Chiral Bicyclic Dihydropyrans **4** by using Normal Saturated Aldehydes

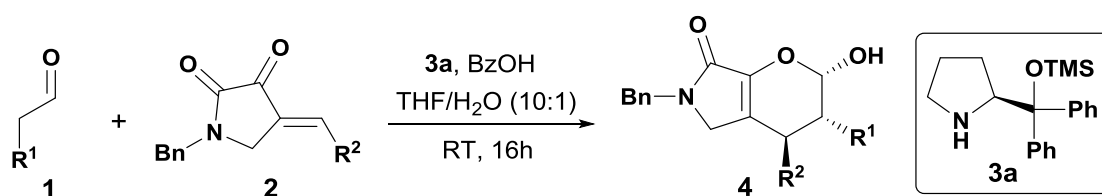

A glass tube was charged with pyrrolidine-2,3-dione **2** (0.2 mmol), amine catalyst **3a** (0.04 mmol, 13 mg) and benzoic acid (0.04 mmol, 4.9 mg) in THF/H<sub>2</sub>O (*v/v* = 10:1, 0.1 M, 2 mL). The saturated aldehydes **1** (0.3 mmol) was added with a syringe, and the reaction was sealed with a Teflon cap and stirred at room temperature for about 16 hours. When the reaction was complete, the mixture was directly purified by column chromatography on silica gel eluting with petroleum ether/ethyl acetate (6:1 to 2:1) to afford the corresponding bicyclic dihydropyrans **4**, which was dried under vacuum and further analyzed by <sup>1</sup>H-NMR, <sup>13</sup>C-NMR, HRMS, chiral HPLC analysis, *etc.*

#### (2*S*,3*R*,4*S*)-6-benzyl-2-hydroxy-3-methyl-4-phenyl-3,4,5,6-tetrahydropyrano[2,3-*c*]pyrrol-7(2*H*)-one **4a**

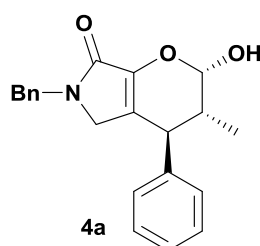

Prepared according to the general procedure using *n*-propanal (17.4 mg, 0.3 mmol, 1.5 equiv) and 1-benzyl-4-benzylidenepyrrolidine-2,3-dione **2a** (55.4 mg, 0.2 mmol, 1.0 equiv). Purification of the crude product via column chromatography delivered **4a** as a white solid with 90% yield. The diastereomeric ratio was determined to be >95:5 by crude <sup>1</sup>H-NMR analysis, and the enantiomeric excess of the major product was determined to be >99% by chiral HPLC analysis on Chiralpak AD-H column (25% 2-propanol/*n*-hexane, 1 mL/min), UV 220 nm, *t*<sub>major</sub> = 6.48 min, *t*<sub>minor</sub> = 12.19 min; [ $\alpha$ ]<sub>D</sub><sup>20</sup> = 86.4 (*c* = 1.0 in CH<sub>2</sub>Cl<sub>2</sub>).

*NMR and HRMS data for the product 4a:*

<sup>1</sup>H NMR (400 MHz, CDCl<sub>3</sub>):  $\delta$  (ppm): 7.32 – 7.26 (m, 4H), 7.25 – 7.22 (m, 2H), 7.19 – 7.16 (m, 2H), 7.14 – 7.12 (m, 2H), 5.66 (d, *J* = 2.4 Hz, 1H), 4.73 (d, *J* = 15.2 Hz, 1H), 4.41 (d, *J* = 15.2 Hz, 1H), 3.53 – 3.36 (m, 3H), 2.16 – 2.07 (m, 1H), 0.96 (d, *J* = 6.8 Hz, 3H).

<sup>13</sup>C NMR (100 MHz, CDCl<sub>3</sub>):  $\delta$  (ppm): 166.9, 142.4, 140.5, 136.7, 128.7, 128.6, 128.4, 128.0, 127.6, 127.1, 124.3, 96.9, 47.9, 46.5, 41.5, 39.7, 14.2

HRMS (ESI): *m/z* calculated for C<sub>21</sub>H<sub>21</sub>NO<sub>3</sub>Na<sup>+</sup>: 358.1419, found: 358.1417.

**(2*S*,3*R*,4*S*)-6-benzyl-4-(4-bromophenyl)-2-hydroxy-3-methyl-3,4,5,6-tetrahydropyrano[2,3-*c*]pyrrol-7(2*H*)-one 4b**

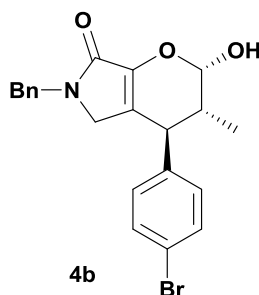

Prepared according to the general procedure using *n*-propanal (17.4 mg, 0.3 mmol, 1.5 equiv) and 1-benzyl-4-(4-bromobenzylidene)-pyrrolidine-2,3-dione **2b** (71.2 mg, 0.2 mmol, 1.0 equiv). Purification of the crude product via column chromatography delivered **4b** as a white solid with 92% yield. The diastereomeric ratio was determined to be 91:9 by crude <sup>1</sup>H-NMR analysis, and the enantiomeric excess of the major product was determined to be >99% by chiral HPLC analysis on Chiralpak AD-H column (25% 2-propanol/*n*-hexane, 1 mL/min), UV 220 nm, *t*<sub>major</sub> = 6.43 min, *t*<sub>minor</sub> = 11.10 min; [ $\alpha$ ]<sub>D</sub><sup>20</sup> = +46.9 (*c* = 1.60 in CH<sub>2</sub>Cl<sub>2</sub>).

*NMR and HRMS data for the product 4b:*

<sup>1</sup>H NMR (400 MHz, CDCl<sub>3</sub>):  $\delta$  (ppm): 7.43 (d, *J* = 8.4 Hz, 2H), 7.32 – 7.23 (m, 3H), 7.22 – 7.13 (m, 2H), 7.02 (d, *J* = 8.4 Hz, 2H), 6.24 (br s, 1H), 5.71 (br s, 1H), 4.69 (d, *J* = 14.8 Hz, 1H), 4.44 (d, *J* = 14.8 Hz, 1H), 3.50 – 3.44 (m, 2H), 3.35 (d, *J* = 18.0 Hz, 1H), 2.11 – 2.03 (m, 1H), 0.95 (d, *J* = 6.8 Hz, 3H).

<sup>13</sup>C NMR (100 MHz, CDCl<sub>3</sub>):  $\delta$  (ppm): 166.7, 142.7, 139.5, 136.6, 131.9, 130.2, 128.7, 128.1, 127.7, 123.3, 121.0, 96.8, 47.8, 46.6, 41.1, 39.8, 14.2

HRMS (ESI): *m/z* calculated for C<sub>21</sub>H<sub>20</sub>BrNO<sub>3</sub>Na<sup>+</sup>: 436.0524, found: 436.0527.

**(2*S*,3*R*,4*S*)-6-benzyl-4-(4-chlorophenyl)-2-hydroxy-3-methyl-3,4,5,6-tetrahydropyrano[2,3-*c*]pyrrol-7(2*H*)-one 4c**

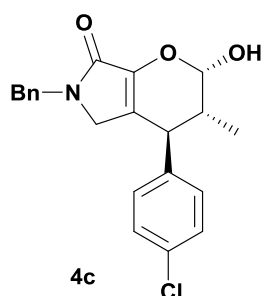

Prepared according to the general procedure using *n*-propanal (17.4 mg, 0.3 mmol, 1.5 equiv) and 1-benzyl-4-(4-chlorobenzylidene)-pyrrolidine-2,3-dione **2c** (62.2 mg, 0.2 mmol, 1.0 equiv). Purification of the crude product via column chromatography delivered **4c** as a white solid with 93% yield. The diastereomeric ratio was determined to be 90:10 by crude <sup>1</sup>H-NMR analysis, and the enantiomeric excess of the major product was determined to be 99% by chiral HPLC analysis on Chiralpak AD-H column (25% 2-propanol/*n*-hexane, 1 mL/min), UV 220 nm,  $t_{\text{major}} = 6.36$  min,  $t_{\text{minor}} = 10.88$  min;  $[\alpha]_{\text{D}}^{20} = +68.3$  ( $c = 1.14$  in CH<sub>2</sub>Cl<sub>2</sub>).

*NMR and HRMS data for the product 4c:*

**<sup>1</sup>H NMR (400 MHz, CDCl<sub>3</sub>):**  $\delta$  (ppm): 7.24 – 7.18 (m, 5H), 7.12 – 7.09 (m, 2H), 7.02 – 6.98 (m, 2H), 6.11 (br s, 1H), 5.63 (d,  $J = 2.4$  Hz, 1H), 4.62 (d,  $J = 14.8$  Hz, 1H), 4.37 (d,  $J = 14.8$  Hz, 1H), 3.44 – 3.37 (m, 2H), 3.28 (d,  $J = 18.4$  Hz, 1H), 2.04 – 1.96 (m, 1H), 0.88 (d,  $J = 6.8$  Hz, 3H).

**<sup>13</sup>C NMR (100 MHz, CDCl<sub>3</sub>):**  $\delta$  (ppm): 166.7, 142.6, 139.0, 136.6, 133.0, 129.8, 129.0, 128.7, 128.1, 127.7, 123.5, 96.8, 47.8, 46.6, 41.0, 39.8, 14.1

**HRMS (ESI):**  $m/z$  calculated for C<sub>21</sub>H<sub>20</sub>ClNO<sub>3</sub>Na<sup>+</sup>: 392.1029, found: 392.1029.

**(2*S*,3*R*,4*S*)-6-benzyl-4-(4-fluorophenyl)-2-hydroxy-3-methyl-3,4,5,6-tetrahydropyrano[2,3-*c*]pyrrol-7(2*H*)-one 4d**

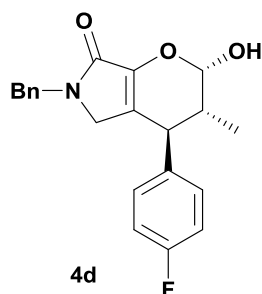

Prepared according to the general procedure using *n*-propanal (17.4 mg, 0.3 mmol, 1.5 equiv) and 1-benzyl-4-(4-fluorobenzylidene)-pyrrolidine-2,3-dione **2d** (59.0 mg, 0.2 mmol, 1.0 equiv). Purification of the crude product via column chromatography delivered **4d** as a white solid with 98% yield. The diastereomeric ratio was determined to be 89:11 by crude <sup>1</sup>H-NMR analysis, and the enantiomeric excess of the major product was determined to be 99% by

chiral HPLC analysis on Chiralpak AD-H column (25% 2-propanol/*n*-hexane, 1 mL/min), UV 220 nm,  $t_{\text{major}} = 6.45$  min,  $t_{\text{minor}} = 11.48$  min;  $[\alpha]_{\text{D}}^{20} = +68.9$  ( $c = 1.51$  in  $\text{CH}_2\text{Cl}_2$ ).

*NMR and HRMS data for the product 4d:*

**$^1\text{H}$  NMR (400 MHz,  $\text{CDCl}_3$ ):**  $\delta$  (ppm): 7.31 – 7.23 (m, 3H), 7.21 – 7.17 (m, 2H), 7.12 – 7.08 (m, 2H), 7.02 – 6.97 (m, 2H), 6.31 (br s, 1H), 5.71 (d,  $J = 2.4$  Hz, 1H), 4.69 (d,  $J = 14.8$  Hz, 1H), 4.44 (d,  $J = 14.8$  Hz, 1H), 3.53 – 3.45 (m, 2H), 3.35 (d,  $J = 18.4$  Hz, 1H), 2.11 – 2.03 (m, 1H), 0.95 (d,  $J = 6.8$  Hz, 3H).

**$^{13}\text{C}$  NMR (100 MHz,  $\text{CDCl}_3$ ):**  $\delta$  (ppm): 166.8, 163.1, 160.7, 142.5, 136.7, 136.1, 136.0, 129.8, 128.7, 128.1, 127.6, 123.8, 115.8, 115.6, 96.8, 47.8, 46.6, 40.9, 39.9, 14.2

**HRMS (ESI):**  $m/z$  calculated for  $\text{C}_{21}\text{H}_{20}\text{FNO}_3\text{Na}^+$ : 376.1325, found: 376.1325.

**(2*S*,3*R*,4*S*)-6-benzyl-2-hydroxy-3-methyl-4-(4-nitrophenyl)-3,4,5,6-tetrahydropyrano[2,3-*c*]pyrrol-7(2*H*)-one 4e**

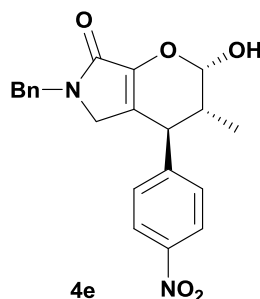

Prepared according to the general procedure using *n*-propanal (17.4 mg, 0.3 mmol, 1.5 equiv) and 1-benzyl-4-(4-nitrobenzylidene)-pyrrolidine-2,3-dione **2e** (64.4 mg, 0.2 mmol, 1.0 equiv). Purification of the crude product via column chromatography delivered **4e** as a white solid with 98% yield. The diastereomeric ratio was determined to be >95:5 by crude  $^1\text{H}$ -NMR analysis, and the enantiomeric excess of the major product was determined to be >99% by chiral HPLC analysis on Chiralpak AD-H column (25% 2-propanol/*n*-hexane, 1 mL/min), UV 220 nm,  $t_{\text{major}} = 9.68$  min,  $t_{\text{minor}} = 15.75$  min;  $[\alpha]_{\text{D}}^{20} = +54.8$  ( $c = 0.99$  in  $\text{CH}_2\text{Cl}_2$ ).

*NMR and HRMS data for the product 4e:*

**$^1\text{H}$  NMR (400 MHz,  $\text{CDCl}_3$ ):**  $\delta$  (ppm): 8.18 (d,  $J = 8.8$  Hz, 2H), 7.35 – 7.26 (m, 5H), 7.18 (d,  $J = 8.0$  Hz, 2H), 6.74 (br s, 1H), 5.76 (br s, 1H), 4.67 (d,  $J = 14.8$  Hz, 1H), 4.48 (d,  $J = 14.8$  Hz, 1H), 3.69 (d,  $J = 10.8$  Hz, 1H), 3.49 (d,  $J = 18.4$  Hz, 1H), 3.34 (d,  $J = 18.4$  Hz, 1H), 2.18 – 2.11 (m, 1H), 0.98 (d,  $J = 6.8$  Hz, 3H).

**$^{13}\text{C}$  NMR (100 MHz,  $\text{CDCl}_3$ ):**  $\delta$  (ppm): 166.6, 148.4, 147.3, 143.1, 136.4, 129.3, 128.8, 128.1, 127.8, 124.1, 122.1, 96.6, 47.7, 46.6, 41.7, 39.9, 14.2

**HRMS (ESI):**  $m/z$  calculated for  $\text{C}_{21}\text{H}_{20}\text{N}_2\text{O}_5\text{Na}^+$ : 403.1270, found: 403.1269.

**(2*S*,3*R*,4*S*)-6-benzyl-4-(3-bromophenyl)-2-hydroxy-3-methyl-3,4,5,6-tetrahydropyrano[2,3-*c*]pyrrol-7(2*H*)-one 4f**

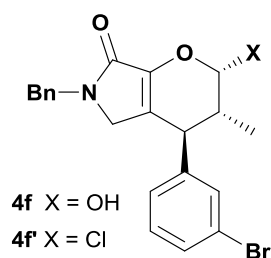

Prepared according to the general procedure using *n*-propanal (17.4 mg, 0.3 mmol, 1.5 equiv) and 1-benzyl-4-(3-bromobenzylidene)-pyrrolidine-2,3-dione **2f** (71.2 mg, 0.2 mmol, 1.0 equiv). Purification of the crude product via column chromatography delivered **4f** as a white solid with 94% yield. The diastereomeric ratio was determined to be 90:10 by crude <sup>1</sup>H-NMR analysis, and the diastereoisomers cannot be separated by simple column chromatography; in order to get clean NMR and HPLC spectrum, **4f** was transformed to its analogue **4f'** <sup>[3]</sup>, thus the enantiomeric excess of **4f'** was determined to be >99% by chiral HPLC analysis on Chiralpak AD-H column (10% 2-propanol/*n*-hexane, 1 mL/min), UV 220 nm, *t*<sub>major</sub> = 36.58 min, *t*<sub>minor</sub> = 39.84 min; [α]<sub>D</sub><sup>20</sup> = +110.5 (*c* = 1.76 in CH<sub>2</sub>Cl<sub>2</sub>, data for **4f'**).

*NMR and HRMS data for the product 4f'* :

**<sup>1</sup>H NMR (400 MHz, CDCl<sub>3</sub>):** δ (ppm): 7.44 – 7.41 (m, 1H), 7.33 – 7.26 (m, 4H), 7.21 – 7.18 (m, 3H), 7.07 – 7.05 (m, 1H), 6.20 (d, *J* = 2.4 Hz, 1H), 4.75 (d, *J* = 14.8 Hz, 1H), 4.43 (d, *J* = 14.8 Hz, 1H), 3.56 – 3.47 (m, 2H), 3.36 (d, *J* = 18.4 Hz, 1H), 2.44 – 2.36 (m, 1H), 0.95 (d, *J* = 6.8 Hz, 3H).

**<sup>13</sup>C NMR (100 MHz, CDCl<sub>3</sub>):** δ (ppm): 164.1, 141.9, 141.1, 136.5, 131.0, 130.6, 128.7, 127.9, 127.7, 125.1, 123.1, 94.1, 47.2, 46.5, 41.8, 41.7, 14.7

**HRMS (ESI):** *m/z* calculated for C<sub>21</sub>H<sub>19</sub>BrClNO<sub>2</sub>Na<sup>+</sup>: 454.0185, found: 454.0186.

**(2*S*,3*R*,4*S*)-6-benzyl-4-(3-chlorophenyl)-2-hydroxy-3-methyl-3,4,5,6-tetrahydropyrano[2,3-*c*]pyrrol-7(2*H*)-one 4g**

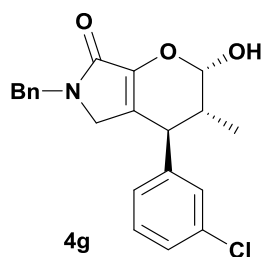

Prepared according to the general procedure using *n*-propanal (17.4 mg, 0.3 mmol, 1.5 equiv) and 1-benzyl-4-(3-chlorobenzylidene)-pyrrolidine-2,3-dione **2g** (62.2 mg, 0.2 mmol, 1.0 equiv). Purification of the crude product via column chromatography delivered **4g** as a white solid with 95% yield. The diastereomeric ratio was determined to be 91:9 by crude <sup>1</sup>H-NMR analysis, and the enantiomeric excess of the major product was determined to be >99% by chiral HPLC analysis on Chiralpak AD-H column (25% 2-propanol/*n*-hexane, 1 mL/min), UV 220 nm, *t*<sub>major</sub> = 6.16 min, *t*<sub>minor</sub> = 12.18 min; [α]<sub>D</sub><sup>20</sup> = +57.1 (*c* = 1.38 in CH<sub>2</sub>Cl<sub>2</sub>).



*NMR and HRMS data for the product 4g:*

**<sup>1</sup>H NMR (400 MHz, CDCl<sub>3</sub>):** δ (ppm): 7.32 – 7.23 (m, 5H), 7.20 – 7.17 (m, 2H), 7.13 – 7.12 (m, 1H), 7.04 – 7.01 (m, 1H), 5.90 (br s, 1H), 5.70 (br s, 1H), 4.74 (d, *J* = 14.8 Hz, 1H), 4.42 (d, *J* = 14.8 Hz, 1H), 3.50 – 3.46 (m, 2H), 3.36 (d, *J* = 18.4 Hz, 1H), 2.14 – 2.06 (m, 1H), 0.97 (d, *J* = 6.8 Hz, 3H).

**<sup>13</sup>C NMR (100 MHz, CDCl<sub>3</sub>):** δ (ppm): 166.6, 142.7, 142.6, 136.7, 134.7, 130.1, 128.7, 128.1, 128.0, 127.9, 127.7, 127.5, 123.2, 96.7, 47.7, 46.5, 41.4, 39.7, 14.2

**HRMS (ESI):** *m/z* calculated for C<sub>21</sub>H<sub>20</sub>CINO<sub>3</sub>Na<sup>+</sup>: 392.1029, found: 392.1023.

**(2*S*,3*R*,4*S*)-6-benzyl-2-hydroxy-3-methyl-4-(*p*-tolyl)-3,4,5,6-tetrahydropyranof[2,3-*c*]pyrrol-7(2*H*)-one 4h**

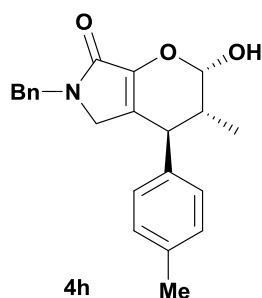

Prepared according to the general procedure using *n*-propanal (17.4 mg, 0.3 mmol, 1.5 equiv) and 1-benzyl-4-(4-methylbenzylidene)-pyrrolidine-2,3-dione **2h** (58.2 mg, 0.2 mmol, 1.0 equiv). Purification of the crude product via column chromatography delivered **4h** as a white solid with 96% yield. The diastereomeric ratio was determined to be 90:10 by crude <sup>1</sup>H-NMR analysis, and the enantiomeric excess of the major product was determined to be >99% by chiral HPLC analysis on Chiralpak AD-H column (25% 2-propanol/*n*-hexane, 1 mL/min), UV 220 nm, *t*<sub>major</sub> = 5.87 min, *t*<sub>minor</sub> = 9.94 min; [α]<sub>D</sub><sup>20</sup> = +52.5 (*c* = 1.71 in CH<sub>2</sub>Cl<sub>2</sub>).

*NMR and HRMS data for the product 4h:*

**<sup>1</sup>H NMR (400 MHz, CDCl<sub>3</sub>):** δ (ppm): 7.51 – 7.44 (m, 3H), 7.39 – 7.37 (m, 2H), 7.31 (d, *J* = 8.0 Hz, 2H), 7.22 (d, *J* = 8.0 Hz, 2H), 5.92 (br s, 1H), 4.90 (d, *J* = 14.8 Hz, 1H), 4.64 (d, *J* = 14.8 Hz, 1H), 3.70 – 3.65 (m, 2H), 3.60 (d, *J* = 18.4 Hz, 1H), 2.53 (s, 3H), 2.33 – 2.28 (m, 1H), 1.16 (d, *J* = 6.8 Hz, 3H).

**<sup>13</sup>C NMR (100 MHz, CDCl<sub>3</sub>):** δ (ppm): 166.9, 142.3, 137.4, 136.8, 136.7, 129.4, 128.6, 128.3, 128.0, 127.5, 124.5, 96.9, 48.0, 46.5, 41.1, 39.8, 21.0, 14.2

**HRMS (ESI):** *m/z* calculated for C<sub>22</sub>H<sub>23</sub>NO<sub>3</sub>Na<sup>+</sup>: 372.1576, found: 372.1575.

**(2*S*,3*R*,4*S*)-6-benzyl-2-hydroxy-4-(4-methoxyphenyl)-3-methyl-3,4,5,6-tetrahydropyrano[2,3-*c*]pyrrol-7(2*H*)-one 4i**

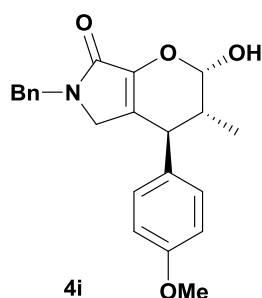

Prepared according to the general procedure using *n*-propanal (17.4 mg, 0.3 mmol, 1.5 equiv) and 1-benzyl-4-(4-methoxybenzylidene)-pyrrolidine-2,3-dione **2i** (61.4 mg, 0.2 mmol, 1.0 equiv). Purification of the crude product via column chromatography delivered **4i** as a white solid with 99% yield. The diastereomeric ratio was determined to be 92:8 by crude <sup>1</sup>H-NMR analysis, and the enantiomeric excess of the major product was determined to be >99% by chiral HPLC analysis on Chiralpak AD-H column (25% 2-propanol/*n*-hexane, 1 mL/min), UV 220 nm,  $t_{\text{major}} = 7.14$  min,  $t_{\text{minor}} = 14.98$  min;  $[\alpha]_{\text{D}}^{20} = +58.2$  ( $c = 1.66$  in CH<sub>2</sub>Cl<sub>2</sub>).

*NMR and HRMS data for the product 4i:*

**<sup>1</sup>H NMR (400 MHz, CDCl<sub>3</sub>):**  $\delta$  (ppm): 7.51 – 7.45 (m, 3H), 7.39 – 7.37 (m, 2H), 7.25 (d,  $J = 8.4$  Hz, 2H), 7.04 (d,  $J = 8.4$  Hz, 2H), 5.91 (br s, 1H), 4.90 (d,  $J = 14.8$  Hz, 1H), 4.64 (d,  $J = 14.8$  Hz, 1H), 3.99 (s, 3H), 3.71 – 3.57 (m, 3H), 2.30 – 2.25 (m, 1H), 1.16 (d,  $J = 6.8$  Hz, 3H).

**<sup>13</sup>C NMR (100 MHz, CDCl<sub>3</sub>):**  $\delta$  (ppm): 166.9, 158.6, 142.3, 136.8, 132.3, 129.3, 128.6, 128.0, 127.5, 124.6, 114.1, 96.9, 55.2, 47.9, 46.5, 40.7, 39.8, 14.2

**HRMS (ESI):**  $m/z$  calculated for C<sub>22</sub>H<sub>23</sub>NO<sub>4</sub>Na<sup>+</sup>: 388.1525, found: 388.1518.

**(2*S*,3*R*,4*S*)-6-benzyl-2-hydroxy-3-methyl-4-(*m*-tolyl)-3,4,5,6-tetrahydropyrano[2,3-*c*]pyrrol-7(2*H*)-one 4h**

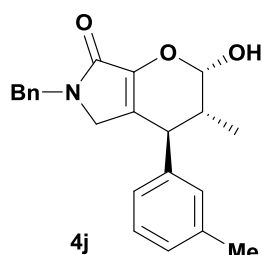

Prepared according to the general procedure using *n*-propanal (17.4 mg, 0.3 mmol, 1.5 equiv) and 1-benzyl-4-(3-methylbenzylidene)-pyrrolidine-2,3-dione **2j** (58.2 mg, 0.2 mmol, 1.0 equiv). Purification of the crude product via column chromatography delivered **4j** as a white solid with 86% yield. The diastereomeric ratio was determined to be 91:9 by crude <sup>1</sup>H-NMR analysis, and the enantiomeric excess of the major product was determined to be >99% by chiral HPLC analysis on Chiralpak AD-H column (25% 2-propanol/*n*-hexane, 1 mL/min), UV 220 nm,  $t_{\text{major}} = 5.52$  min,  $t_{\text{minor}} = 9.56$  min;  $[\alpha]_{\text{D}}^{20} = +50.8$  ( $c = 1.18$  in CH<sub>2</sub>Cl<sub>2</sub>).

*NMR and HRMS data for the product 4j:*

**<sup>1</sup>H NMR (400 MHz, CDCl<sub>3</sub>):** δ (ppm): 7.30 – 7.24 (m, 3H), 7.20 – 7.16 (m, 3H), 7.05 (d, *J* = 7.6 Hz, 1H), 6.93 – 6.91 (m, 2H), 5.70 (br s, 1H), 4.71 (d, *J* = 14.8 Hz, 1H), 4.43 (d, *J* = 14.8 Hz, 1H), 3.50 – 3.36 (m, 3H), 2.31 (s, 3H), 2.15 – 2.08 (m, 1H), 0.96 (d, *J* = 6.8 Hz, 3H).

**<sup>13</sup>C NMR (100 MHz, CDCl<sub>3</sub>):** δ (ppm): 166.9, 142.3, 137.4, 136.8, 136.7, 129.4, 128.6, 128.3, 128.0, 127.5, 124.5, 96.9, 48.0, 46.5, 41.1, 39.8, 21.0, 14.2

**HRMS (ESI):** *m/z* calculated for C<sub>22</sub>H<sub>23</sub>NO<sub>3</sub>Na<sup>+</sup>: 372.1576, found: 372.1575.

**(2*S*,3*R*,4*S*)-6-benzyl-2-hydroxy-4-(2-methoxyphenyl)-3-methyl-3,4,5,6-tetrahydropyrano[2,3-*c*]pyrrol-7(2*H*)-one 4k**

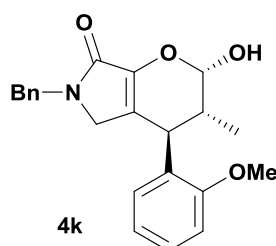

Prepared according to the general procedure using *n*-propanal (17.4 mg, 0.3 mmol, 1.5 equiv) and 1-benzyl-4-(2-methoxybenzylidene)-pyrrolidine-2,3-dione **2k** (61.4 mg, 0.2 mmol, 1.0 equiv). Purification of the crude product via column chromatography delivered **4k** as a white solid with 94% yield. The diastereomeric ratio was determined to be 90:10 by crude <sup>1</sup>H-NMR analysis, and the enantiomeric excess of the major product was determined to be 96% by chiral HPLC analysis on Chiralpak AD-H column (25% 2-propanol/*n*-hexane, 1 mL/min), UV 220 nm, *t*<sub>major</sub> = 8.00 min, *t*<sub>minor</sub> = 17.83 min; [α]<sub>D</sub><sup>20</sup> = +29.3 (*c* = 1.66 in CH<sub>2</sub>Cl<sub>2</sub>).

*NMR and HRMS data for the product 4k:*

**<sup>1</sup>H NMR (400 MHz, CDCl<sub>3</sub>):** δ (ppm): 7.51 – 7.43 (m, 4H), 7.39 – 7.37 (m, 2H), 7.25 (d, *J* = 7.6 Hz, 1H), 7.09 (t, *J* = 7.6 Hz, 1H), 7.04 (d, *J* = 8.0 Hz, 1H), 5.87 (br s, 1H), 4.78 (q, *J* = 15.2 Hz, 2H), 4.19 (d, *J* = 10.4 Hz, 1H), 3.91 (s, 3H), 3.70 (d, *J* = 18.4 Hz, 1H), 3.56 (d, *J* = 18.4 Hz, 1H), 2.48 – 2.44 (m, 1H), 1.15 (d, *J* = 6.8 Hz, 3H).

**<sup>13</sup>C NMR (100 MHz, CDCl<sub>3</sub>):** δ (ppm): 166.9, 157.8, 141.8, 137.0, 130.0, 128.6, 128.3, 128.1, 127.9, 127.4, 125.0, 120.7, 110.7, 96.9, 60.4, 55.2, 48.0, 46.4, 14.1

**HRMS (ESI):** *m/z* calculated for C<sub>22</sub>H<sub>23</sub>NO<sub>4</sub>Na<sup>+</sup>: 388.1525, found: 388.1528.

**(2*S*,3*R*,4*S*)-6-benzyl-4-(3,4-dimethoxyphenyl)-2-hydroxy-3-methyl-3,4,5,6-tetrahydropyrano[2,3-*c*]pyrrol-7(2*H*)-one 4l**

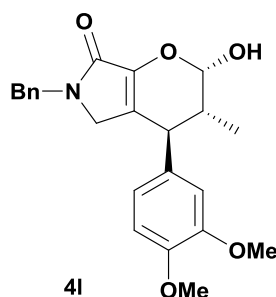

Prepared according to the general procedure using *n*-propanal (17.4 mg, 0.3 mmol, 1.5 equiv) and 1-benzyl-4-(3,4-dimethoxybenzylidene)pyrrolidine-2,3-dione **2l** (67.4 mg, 0.2 mmol, 1.0 equiv). Purification of the crude product via column chromatography delivered **4l** as a white solid with 81% yield. The diastereomeric ratio was determined to be 89:11 by crude <sup>1</sup>H-NMR analysis, and the enantiomeric excess of the major product was determined to be >99% by chiral HPLC analysis on Chiralpak AD-H column (25% 2-propanol/*n*-hexane, 1 mL/min), UV 220 nm, *t*<sub>major</sub> = 7.89 min, *t*<sub>minor</sub> = 16.68 min; [α]<sub>D</sub><sup>20</sup> = 46.3 (*c* = 1.26 in CH<sub>2</sub>Cl<sub>2</sub>).

*NMR and HRMS data for the product 4l:*

<sup>1</sup>H NMR (400 MHz, CDCl<sub>3</sub>): δ (ppm): 7.30 – 7.22 (m, 3H), 7.19 – 7.17 (m, 2H), 6.79 (d, *J* = 8.0 Hz, 1H), 6.70 (dd, *J* = 8.4 Hz, *J* = 2.4 Hz, 1H), 6.57 (d, *J* = 2.4 Hz, 1H), 6.41 (br s, 1H), 5.73 (br s, 1H), 4.58 (q, *J* = 15.2 Hz, 2H), 3.86 (s, 3H), 3.79 (s, 3H), 3.52 – 3.38 (m, 3H), 2.12 – 2.04 (m, 1H), 0.98 (d, *J* = 6.8 Hz, 3H).

<sup>13</sup>C NMR (100 MHz, CDCl<sub>3</sub>): δ (ppm): 166.9, 158.6, 142.3, 136.8, 132.3, 129.3, 128.6, 128.0, 127.5, 124.6, 114.1, 96.9, 55.2, 47.9, 46.5, 40.7, 39.8, 14.2

HRMS (ESI): *m/z* calculated for C<sub>22</sub>H<sub>23</sub>NO<sub>4</sub>Na<sup>+</sup>: 388.1525, found: 388.1518.

**(2*S*,3*R*,4*S*)-6-benzyl-2-hydroxy-4-(3-hydroxy-4-methoxyphenyl)-3-methyl-3,4,5,6-tetrahydro**  
**pyrano[2,3-*c*]pyrrol-7(2*H*)-one 4m**

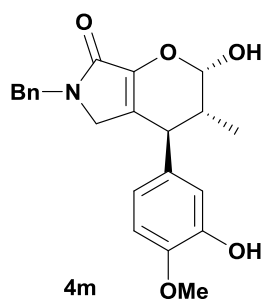

Prepared according to the general procedure using *n*-propanal (17.4 mg, 0.3 mmol, 1.5 equiv) and 1-benzyl-4-(3-hydroxy-4-methoxybenzylidene)-pyrrolidine-2,3-dione **2m** (64.6 mg, 0.2 mmol, 1.0 equiv). Purification of the crude product via column chromatography delivered **4m** as a white solid with 96% yield. The diastereomeric ratio was determined to be 88:12 by crude <sup>1</sup>H-NMR analysis, and the enantiomeric excess of the major product was determined to be >99% by chiral HPLC analysis on Chiralpak AD-H column (25% 2-propanol/*n*-hexane, 1 mL/min), UV 220 nm, *t*<sub>major</sub> = 10.18 min, *t*<sub>minor</sub> = 29.14 min; [α]<sub>D</sub><sup>20</sup> = +154.6 (*c* = 0.58 in CH<sub>2</sub>Cl<sub>2</sub>).

*NMR and HRMS data for the product 4m:*

<sup>1</sup>H NMR (400 MHz, CDCl<sub>3</sub>): δ (ppm): 7.22 – 7.15 (m, 3H), 7.11 – 7.08 (m, 2H), 6.69 (d, *J* = 8.4 Hz, 1H), 6.63 (d, *J* = 2.0 Hz, 1H), 6.54 (dd, *J* = 8.4 Hz, *J* = 2.0 Hz, 1H), 5.63 (br s, 1H), 4.65 (d, *J* = 14.8 Hz, 1H), 4.32 (d, *J* = 14.8 Hz, 1H), 3.78 (s, 3H), 3.42 – 3.30 (m, 3H), 2.02 – 1.99 (m, 1H), 0.88 (d, *J* = 6.8 Hz, 3H).

<sup>13</sup>C NMR (100 MHz, CDCl<sub>3</sub>): δ (ppm): 166.8, 145.8, 145.6, 142.2, 136.8, 133.5, 128.7, 128.1, 128.0, 127.5, 124.5, 114.3, 110.7, 96.9, 55.9, 47.9, 46.5, 40.9, 39.6, 14.2

HRMS (ESI): *m/z* calculated for C<sub>22</sub>H<sub>23</sub>NO<sub>5</sub>Na<sup>+</sup>: 404.1474, found: 404.1474.

**(2*S*,3*R*,4*S*)-6-benzyl-2-hydroxy-3-methyl-4-(naphthalen-2-yl)-3,4,5,6-tetrahydropyrano[2,3-*c*]pyrrol-7(2*H*)-one 4n**

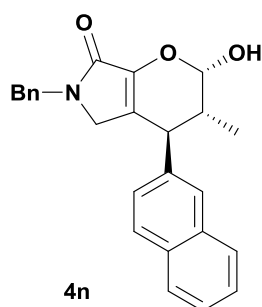

Prepared according to the general procedure using *n*-propanal (17.4 mg, 0.3 mmol, 1.5 equiv) and 1-benzyl-4-(naphthalen-2-ylmethylene)-pyrrolidine-2,3-dione **2n** (77.0 mg, 0.2 mmol, 1.0 equiv). Purification of the crude product via column chromatography delivered **4n** as a white solid with 95% yield. The diastereomeric ratio was determined to be 92:8 by crude <sup>1</sup>H-NMR analysis, and the enantiomeric excess of the major product was determined to be 99% by chiral HPLC analysis on Chiralpak AD-H column (25% 2-propanol/*n*-hexane, 1 mL/min), UV 220 nm, *t*<sub>major</sub> = 6.92 min, *t*<sub>minor</sub> = 13.88 min; [α]<sub>D</sub><sup>20</sup> = +65.4 (*c* = 1.72 in CH<sub>2</sub>Cl<sub>2</sub>).

*NMR and HRMS data for the product 4n:*

<sup>1</sup>H NMR (400 MHz, CDCl<sub>3</sub>): δ (ppm): 8.01 – 7.94 (m, 3H), 7.81 (br s, 1H), 7.69 – 7.62 (m, 2H), 7.47 – 7.40 (m, 4H), 7.35 – 7.33 (m, 2H), 5.98 (br s, 1H), 4.89 (d, *J* = 14.8 Hz, 1H), 4.59 (d, *J* = 14.8 Hz, 1H), 3.89 (d, *J* = 10.8 Hz, 1H), 3.67 (d, *J* = 18.4 Hz, 1H), 3.55 (d, *J* = 18.4 Hz, 1H), 2.47 – 2.42 (m, 1H), 1.19 (d, *J* = 6.8 Hz, 3H).

<sup>13</sup>C NMR (100 MHz, CDCl<sub>3</sub>): δ (ppm): 167.0, 142.5, 137.9, 136.6, 133.4, 132.6, 129.9, 128.6, 128.5, 128.1, 127.9, 127.6, 127.5, 127.4, 126.3, 125.8, 124.1, 96.9, 48.0, 46.5, 41.8, 39.6, 14.3

HRMS (ESI): *m/z* calculated for C<sub>25</sub>H<sub>23</sub>NO<sub>3</sub>Na<sup>+</sup>: 408.1576, found: 408.1574.

**(2*S*,3*R*,4*R*)-6-benzyl-2-hydroxy-3-methyl-4-(thiophen-2-yl)-3,4,5,6-tetrahydropyrano[2,3-*c*]pyrrol-7(2*H*)-one 4o**

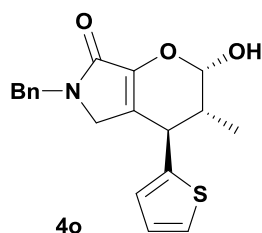

Prepared according to the general procedure using *n*-propanal (17.4 mg, 0.3 mmol, 1.5 equiv) and 1-benzyl-4-(thiophen-2-ylmethylene)-pyrrolidine-2,3-dione **2o** (56.6 mg, 0.2 mmol, 1.0 equiv). Purification of the crude product via column chromatography delivered **4o** as a white solid with 87% yield. The diastereomeric ratio was determined to be 85:15 by crude <sup>1</sup>H-NMR analysis, and the enantiomeric excess of the major product was determined to be 99% by chiral HPLC analysis on Chiralpak AD-H column (30% 2-propanol/*n*-hexane, 1 mL/min), UV 220 nm, *t*<sub>major</sub> = 9.22 min, *t*<sub>minor</sub> = 18.70 min; [α]<sub>D</sub><sup>20</sup> = +55.8 (*c* = 0.53 in CH<sub>2</sub>Cl<sub>2</sub>).

NMR and HRMS data for the product **4o**:

**<sup>1</sup>H NMR (400 MHz, CDCl<sub>3</sub>):** δ (ppm): 7.24 – 7.17 (m, 3H), 7.13 – 7.10 (m, 3H), 6.87 – 6.84 (m, 1H), 6.80 – 6.79 (m, 1H), 6.34 (br s, 1H), 5.64 (br s, 1H), 4.63 (d, *J* = 14.8 Hz, 1H), 4.38 (d, *J* = 14.8 Hz, 1H), 3.81 (d, *J* = 10.8 Hz, 1H), 3.51 – 3.40 (m, 2H), 2.13 – 2.04 (m, 1H), 0.97 (d, *J* = 6.8 Hz, 3H).

**<sup>13</sup>C NMR (100 MHz, CDCl<sub>3</sub>):** δ (ppm): 166.8, 143.6, 141.8, 136.7, 128.7, 128.0, 127.6, 126.7, 126.0, 124.4, 123.6, 96.8, 47.9, 46.5, 40.6, 36.9, 14.3

**HRMS (ESI):** *m/z* calculated for C<sub>19</sub>H<sub>19</sub>NO<sub>3</sub>SNa<sup>+</sup>: 364.0983, found: 364.0984.

**(2*S*,3*R*,4*R*)-6-benzyl-2-hydroxy-3-methyl-4-((*E*)-styryl)-3,4,5,6-tetrahydropyrano[2,3-*c*]pyrrol-7(2*H*)-one **4p****

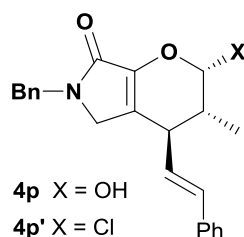

Prepared according to the general procedure using *n*-propanal (17.4 mg, 0.3 mmol, 1.5 equiv) and 1-benzyl-4-((*E*)-3-phenylallylidene)-pyrrolidine-2,3-dione **2p** (60.6 mg, 0.2 mmol, 1.0 equiv). Purification of the crude product via column chromatography delivered **4p** as a white solid with 98% yield. The diastereomeric ratio was determined to be 85:15 by crude <sup>1</sup>H-NMR analysis, and the diastereoisomers cannot be separated by simple column chromatography; in order to get clean NMR and HPLC spectrum, **4p** was transformed to its analogue **4p'**<sup>[31]</sup>, thus the enantiomeric excess of **4p'** was determined to be >99% by chiral HPLC analysis on Chiralpak AD-H column (25% 2-propanol/*n*-hexane, 1 mL/min), UV 254 nm, *t*<sub>major</sub> = 9.08 min, *t*<sub>minor</sub> = 10.79 min; [α]<sub>D</sub><sup>20</sup> = +216.2 (*c* = 0.32 in CH<sub>2</sub>Cl<sub>2</sub>, data for **4p'**).

NMR and HRMS data for the product **4p'** :

**<sup>1</sup>H NMR (400 MHz, CDCl<sub>3</sub>):** δ (ppm): 7.35 – 7.27 (m, 7H), 7.25 – 7.23 (m, 2H), 6.58 (d, *J* = 15.4 Hz, 1H), 6.19 (d, *J* = 2.4 Hz, 1H), 5.85 (dd, *J* = 15.4 Hz, *J* = 9.6 Hz, 1H), 4.61 (q, *J* = 14.8 Hz, 2H), 3.67 – 3.66 (m, 2H), 3.16 (d, *J* = 10.4 Hz, 1H), 2.26 – 2.18 (m, 1H), 1.11 (d, *J* = 6.8 Hz, 3H).

**<sup>13</sup>C NMR (100 MHz, CDCl<sub>3</sub>):** δ (ppm): 164.4, 141.1, 136.8, 136.0, 135.1, 128.8, 128.7, 128.2, 128.1, 127.7, 126.6, 126.3, 125.4, 94.2, 47.7, 46.6, 39.8, 29.7, 15.0

**HRMS (ESI):** *m/z* calculated for C<sub>23</sub>H<sub>22</sub>ClNO<sub>2</sub>Na<sup>+</sup>: 402.1237, found: 402.1240.

**(2S,3R,4S)-2-hydroxy-6-(4-methoxybenzyl)-3-methyl-4-phenyl-3,4,5,6-tetrahydropyrano[2,3-c]pyrrol-7(2H)-one 4q**

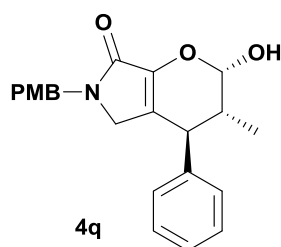

Prepared according to the general procedure using *n*-propanal (17.4 mg, 0.3 mmol, 1.5 equiv) and 4-benzylidene-1-(4-methoxybenzyl)-pyrrolidine-2,3-dione **2q** (61.4 mg, 0.2 mmol, 1.0 equiv). Purification of the crude product via column chromatography delivered **4q** as a white solid with 85% yield. The diastereomeric ratio was determined to be 90:10 by crude <sup>1</sup>H-NMR analysis, and the enantiomeric excess of the major product was determined to be 97% by chiral HPLC analysis on Chiralpak AD-H column (30% 2-propanol/*n*-hexane, 1 mL/min), UV 220 nm,  $t_{\text{major}} = 6.24$  min,  $t_{\text{minor}} = 11.75$  min;  $[\alpha]_{\text{D}}^{20} = +71.0$  ( $c = 2.32$  in CH<sub>2</sub>Cl<sub>2</sub>).

*NMR and HRMS data for the product 4q:*

<sup>1</sup>H NMR (400 MHz, CDCl<sub>3</sub>):  $\delta$  (ppm): 7.24 – 7.20 (m, 2H), 7.18 – 7.14 (m, 1H), 7.06 – 7.00 (m, 4H), 6.74 – 6.70 (m, 2H), 5.66 (br s, 1H), 4.55 (d,  $J = 14.8$  Hz, 1H), 4.28 (d,  $J = 14.8$  Hz, 1H), 3.68 (s, 3H), 3.44 (d,  $J = 10.8$  Hz, 1H), 3.40 – 3.25 (m, 2H), 2.07 – 1.99 (m, 1H), 0.88 (d,  $J = 6.8$  Hz, 3H).

<sup>13</sup>C NMR (100 MHz, CDCl<sub>3</sub>):  $\delta$  (ppm): 166.9, 159.0, 142.4, 140.5, 129.4, 128.8, 128.6, 128.4, 127.0, 124.0, 114.0, 96.8, 55.2, 47.8, 45.9, 41.5, 39.8, 14.2

HRMS (ESI):  $m/z$  calculated for C<sub>22</sub>H<sub>23</sub>NO<sub>4</sub>Na<sup>+</sup>: 388.1525, found: 388.1528.

**(2S,3R,4S)-6-benzyl-3-ethyl-2-hydroxy-4-phenyl-3,4,5,6-tetrahydropyrano[2,3-c]pyrrol-7(2H)-one 4r**

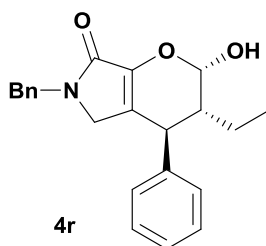

Prepared according to the general procedure using *n*-butyraldehyde (21.6 mg, 0.3 mmol, 1.5 equiv) and 1-benzyl-4-benzylidenepyrrolidine-2,3-dione **2a** (55.4 mg, 0.2 mmol, 1.0 equiv). Purification of the crude product via column chromatography delivered **4r** as a white solid with 88% yield. The diastereomeric ratio was determined to be >95:5 by crude <sup>1</sup>H-NMR analysis, and the enantiomeric excess of the major product was determined to be 98% by chiral HPLC analysis on Chiralpak AD-H column (20% 2-propanol/*n*-hexane, 1 mL/min), UV 220 nm,  $t_{\text{major}} = 5.78$  min,  $t_{\text{minor}} = 10.08$  min;  $[\alpha]_{\text{D}}^{20} = +79.8$  ( $c = 0.94$  in CH<sub>2</sub>Cl<sub>2</sub>).

*NMR and HRMS data for the product 4r:*

**<sup>1</sup>H NMR (400 MHz, CDCl<sub>3</sub>):** δ (ppm): 7.32 – 7.28 (m, 3H), 7.25 – 7.21 (m, 3H), 7.18 – 7.12 (m, 4H), 6.05 (br s, 1H), 5.88 (br s, 1H), 4.72 (d, *J* = 14.8 Hz, 1H), 4.40 (d, *J* = 14.8 Hz, 1H), 3.54 (d, *J* = 10.8 Hz, 1H), 3.49 – 3.31 (m, 2H), 1.97 – 1.90 (m, 1H), 1.57 – 1.47 (m, 2H), 0.87 (t, *J* = 7.2 Hz, 3H).

**<sup>13</sup>C NMR (100 MHz, CDCl<sub>3</sub>):** δ (ppm): 166.8, 142.3, 140.7, 136.8, 128.7, 128.6, 128.1, 128.0, 127.6, 127.1, 124.4, 94.7, 47.9, 46.5, 46.0, 40.9, 21.6, 11.7

**HRMS (ESI):** *m/z* calculated for C<sub>22</sub>H<sub>23</sub>NO<sub>3</sub>Na<sup>+</sup>: 372.1576, found: 372.1578.

**(2*S*,3*R*,4*S*)-6-benzyl-2-hydroxy-4-phenyl-3-propyl-3,4,5,6-tetrahydropyrano[2,3-*c*]pyrrol-7(2*H*)-one 4s**

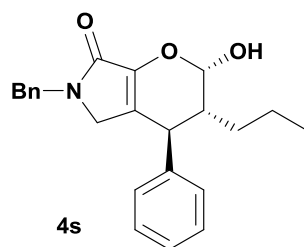

Prepared according to the general procedure using *n*-pentanal (25.8 mg, 0.3 mmol, 1.5 equiv) and 1-benzyl-4-benzylidenepyrrolidine-2,3-dione **2a** (55.4 mg, 0.2 mmol, 1.0 equiv). Purification of the crude product via column chromatography delivered **4s** as a white solid with 92% yield. The diastereomeric ratio was determined to be 94:6 by crude <sup>1</sup>H-NMR analysis, and the enantiomeric excess of the major product was determined to be 96% by chiral HPLC analysis on Chiralpak AD-H column (25% 2-propanol/*n*-hexane, 1 mL/min), UV 220 nm, *t*<sub>major</sub> = 5.23 min, *t*<sub>minor</sub> = 8.47 min; [α]<sub>D</sub><sup>20</sup> = +60.8 (*c* = 1.12 in CH<sub>2</sub>Cl<sub>2</sub>).

*NMR and HRMS data for the product 4s:*

**<sup>1</sup>H NMR (400 MHz, CDCl<sub>3</sub>):** δ (ppm): 7.33 – 7.21 (m, 6H), 7.18 – 7.12 (m, 4H), 6.60 (br s, 1H), 5.88 (br s, 1H), 4.71 (d, *J* = 14.8 Hz, 1H), 4.40 (d, *J* = 14.8 Hz, 1H), 3.55 (d, *J* = 10.8 Hz, 1H), 3.46 (d, *J* = 18.4 Hz, 1H), 3.32 (d, *J* = 18.4 Hz, 1H), 2.07 – 2.00 (m, 1H), 1.60 – 1.51 (m, 1H), 1.48 – 1.38 (m, 1H), 1.21 – 1.10 (m, 1H), 0.92 – 0.83 (m, 1H), 0.77 (t, *J* = 7.2 Hz, 3H).

**<sup>13</sup>C NMR (100 MHz, CDCl<sub>3</sub>):** δ (ppm): 167.0, 142.2, 140.7, 136.7, 128.7, 128.6, 128.0, 127.9, 127.5, 127.1, 124.5, 94.9, 48.0, 46.5, 44.1, 40.9, 30.8, 20.1, 14.1

**HRMS (ESI):** *m/z* calculated for C<sub>23</sub>H<sub>25</sub>NO<sub>3</sub>Na<sup>+</sup>: 386.1732, found: 386.1736.

**(2*S*,3*R*,4*S*)-6-benzyl-3-butyl-2-hydroxy-4-phenyl-3,4,5,6-tetrahydropyrano[2,3-*c*]pyrrol-7(2*H*)-one 4t**

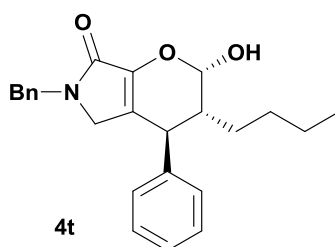



Prepared according to the general procedure using *n*-hexanal (30.0 mg, 0.3 mmol, 1.5 equiv) and 1-benzyl-4-benzylidenepyrrolidine-2,3-dione **2a** (55.4 mg, 0.2 mmol, 1.0 equiv). Purification of the crude product via column chromatography delivered **4t** as a white solid with 82% yield. The diastereomeric ratio was determined to be 93:7 by crude <sup>1</sup>H-NMR analysis, and the enantiomeric excess of the major product was determined to be 97% by chiral HPLC analysis on Chiralpak AD-H column (25% 2-propanol/*n*-hexane, 1 mL/min), UV 220 nm, *t*<sub>major</sub> = 5.08 min, *t*<sub>minor</sub> = 7.40 min; [α]<sub>D</sub><sup>20</sup> = +58.2 (*c* = 1.21 in CH<sub>2</sub>Cl<sub>2</sub>).

*NMR and HRMS data for the product 4t:*

<sup>1</sup>H NMR (400 MHz, CDCl<sub>3</sub>): δ (ppm): 7.32 – 7.27 (m, 4H), 7.24 – 7.21 (m, 2H), 7.18 – 7.16 (m, 2H), 7.14 – 7.12 (m, 2H), 5.83 (br s, 1H), 4.72 (d, *J* = 14.8 Hz, 1H), 4.40 (d, *J* = 14.8 Hz, 1H), 3.53 (d, *J* = 10.8 Hz, 1H), 3.46 (d, *J* = 18.4 Hz, 1H), 3.32 (d, *J* = 18.4 Hz, 1H), 2.04 – 1.97 (m, 1H), 1.58 – 1.48 (m, 1H), 1.40 – 1.32 (m, 1H), 1.26 – 1.05 (m, 4H), 0.77 (t, *J* = 7.2 Hz, 3H).

<sup>13</sup>C NMR (100 MHz, CDCl<sub>3</sub>): δ (ppm): 166.8, 142.2, 140.6, 136.8, 130.1, 128.7, 128.6, 128.0, 127.6, 127.1, 124.5, 94.9, 47.9, 46.5, 44.2, 40.9, 29.1, 28.3, 22.7, 13.8

HRMS (ESI): *m/z* calculated for C<sub>24</sub>H<sub>27</sub>NO<sub>3</sub>Na<sup>+</sup>: 400.1889, found: 400.1892.

**(2*S*,3*R*,4*S*)-6-benzyl-2-hydroxy-3-isopropyl-4-phenyl-3,4,5,6-tetrahydropyranof[2,3-*c*]pyrrol-7(2*H*)-one 4u**

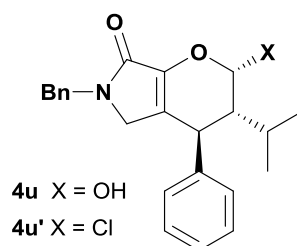

Prepared according to the general procedure using 3-methylbutanal (25.8 mg, 0.3 mmol, 1.5 equiv) and 1-benzyl-4-benzylidenepyrrolidine-2,3-dione **2a** (55.4 mg, 0.2 mmol, 1.0 equiv). Purification of the crude product via column chromatography delivered **4u** as a white solid with 70% yield. The diastereomeric ratio was determined to be 85:15 by crude <sup>1</sup>H-NMR analysis, and the diastereoisomers cannot be separated by simple column chromatography; in order to get clean NMR and HPLC spectrum, **4u** was transformed to its analogue **4u'**<sup>[3]</sup>, thus the enantiomeric excess of **4u'** was determined to be 97% by chiral HPLC analysis on Chiralpak OD-H column (30% 2-propanol/*n*-hexane, 1 mL/min), UV 220 nm, *t*<sub>minor</sub> = 8.74 min, *t*<sub>major</sub> = 13.03 min; [α]<sub>D</sub><sup>20</sup> = +175.0 (*c* = 0.26 in CH<sub>2</sub>Cl<sub>2</sub>, data for **4u'**).

*NMR and HRMS data for the product 4u'* :

<sup>1</sup>H NMR (400 MHz, CDCl<sub>3</sub>): δ (ppm): 7.33 – 7.24 (m, 6H), 7.17 – 7.14 (m, 4H), 6.36 (d, *J* = 2.4 Hz, 1H), 4.75 (d, *J* = 14.8 Hz, 1H), 4.35 (d, *J* = 14.8 Hz, 1H), 3.81 (d, *J* = 11.2 Hz, 1H), 3.50 (d, *J* = 18.4 Hz, 1H), 3.19 (d, *J* = 18.4 Hz, 1H), 2.42 – 2.37 (m, 1H), 1.75 – 1.67 (m, 1H), 0.95 (d, *J* = 7.2 Hz, 3H), 0.79 (d, *J* = 7.2 Hz, 3H).

<sup>13</sup>C NMR (100 MHz, CDCl<sub>3</sub>): δ (ppm): 164.4, 140.9, 139.7, 136.8, 129.1, 128.7, 128.1, 127.9, 127.6, 127.5, 127.4, 91.7, 50.9, 47.4, 46.4, 39.9, 28.1, 21.1, 19.0

HRMS (ESI): *m/z* calculated for C<sub>23</sub>H<sub>24</sub>ClNO<sub>2</sub>Na<sup>+</sup>: 404.1393, found: 404.1397.

**(2S,3R,4S)-3,6-dibenzyl-2-hydroxy-4-phenyl-3,4,5,6-tetrahydropyrano[2,3-c]pyrrol-7(2H)-one 4v**

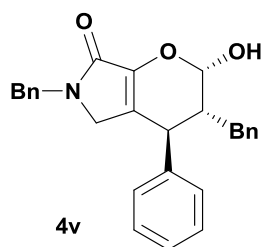

Prepared according to the general procedure using 3-phenylpropanal (40.2 mg, 0.3 mmol, 1.5 equiv) and 1-benzyl-4-benzylidenepyrrolidine-2,3-dione **2a** (55.4 mg, 0.2 mmol, 1.0 equiv). Purification of the crude product via column chromatography delivered **4v** as a white solid with 85% yield. The diastereomeric ratio was determined to be 93:7 by crude  $^1\text{H-NMR}$  analysis, and the enantiomeric excess of the major product was determined to be 99% by chiral HPLC analysis on Chiralpak AD-H column (25% 2-propanol/*n*-hexane, 1 mL/min), UV 220 nm,  $t_{\text{major}} = 6.25$  min,  $t_{\text{minor}} = 7.78$  min;  $[\alpha]_{\text{D}}^{20} = +126.8$  ( $c = 0.48$  in  $\text{CH}_2\text{Cl}_2$ ).

*NMR and HRMS data for the product 4v:*

$^1\text{H NMR}$  (400 MHz,  $\text{CDCl}_3$ ):  $\delta$  (ppm): 7.35 – 7.19 (m, 8H), 7.18 – 7.16 (m, 4H), 7.14 – 7.09 (m, 1H), 7.06 – 7.04 (m, 2H), 5.45 (br s, 1H), 4.72 (d,  $J = 14.8$  Hz, 1H), 4.40 (d,  $J = 14.8$  Hz, 1H), 3.65 (d,  $J = 10.8$  Hz, 1H), 3.48 (d,  $J = 18.4$  Hz, 1H), 3.33 (d,  $J = 18.4$  Hz, 1H), 2.77 – 2.71 (m, 1H), 2.56 (dd,  $J = 13.6$  Hz,  $J = 3.6$  Hz, 1H), 2.29 – 2.22 (m, 1H).

$^{13}\text{C NMR}$  (100 MHz,  $\text{CDCl}_3$ ):  $\delta$  (ppm): 167.0, 142.2, 140.7, 136.7, 128.7, 128.6, 128.0, 127.9, 127.5, 127.1, 124.5, 94.9, 48.0, 46.5, 44.1, 40.9, 30.8, 20.1, 14.1

**HRMS (ESI):**  $m/z$  calculated for  $\text{C}_{23}\text{H}_{25}\text{NO}_3\text{Na}^+$ : 386.1732, found: 386.1736.

**(2S,3R,4S)-6-benzyl-3-(2-(benzyloxy)ethyl)-2-hydroxy-4-phenyl-3,4,5,6-tetrahydropyrano[2,3-c]pyrrol-7(2H)-one 4w**

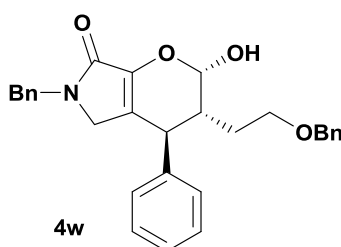

Prepared according to the general procedure using 4-(benzyloxy)butanal (40.2 mg, 0.3 mmol, 1.5 equiv) and 1-benzyl-4-benzylidenepyrrolidine-2,3-dione **2a** (55.4 mg, 0.2 mmol, 1.0 equiv). Purification of the crude product via column chromatography delivered **4w** as a white solid with 80% yield. The diastereomeric ratio was determined to be 94:6 by crude  $^1\text{H-NMR}$  analysis, and the enantiomeric excess of the major product was determined to be 99% by chiral HPLC analysis on Chiralpak AD-H column (25% 2-propanol/*n*-hexane, 1 mL/min), UV 220 nm,  $t_{\text{major}} = 7.11$  min,  $t_{\text{minor}} = 10.56$  min;  $[\alpha]_{\text{D}}^{20} = +69.1$  ( $c = 1.09$  in  $\text{CH}_2\text{Cl}_2$ ).

*NMR and HRMS data for the product 4w:*

$^1\text{H NMR}$  (400 MHz,  $\text{CDCl}_3$ ):  $\delta$  (ppm): 7.33 – 7.24 (m, 8H), 7.23 – 7.21 (m, 3H), 7.18 – 7.12 (m, 4H), 6.37 (br s, 1H), 5.86 (br s, 1H), 4.70 (d,  $J = 14.8$  Hz, 1H), 4.41 (d,  $J = 14.8$  Hz, 1H),

4.33 (s, 2H), 3.59 (d,  $J = 10.8$  Hz, 1H), 3.50 – 3.42 (m, 2H), 3.37 – 3.31 (m, 2H), 2.29 – 2.23 (m, 1H), 1.91 – 1.81 (m, 1H), 1.66 – 1.58 (m, 1H).

$^{13}\text{C}$  NMR (100 MHz,  $\text{CDCl}_3$ ):  $\delta$  (ppm): 166.8, 142.2, 140.4, 138.2, 136.7, 128.8, 128.6, 128.4, 128.3, 128.0, 127.6, 127.5, 127.4, 127.2, 124.1, 94.9, 72.6, 68.0, 47.9, 46.5, 41.6, 40.9, 28.7

HRMS (ESI):  $m/z$  calculated for  $\text{C}_{29}\text{H}_{29}\text{NO}_4\text{Na}^+$ : 478.1994, found: 478.2000.

#### 4. General Procedure for the Synthesis of Chiral Bicyclic Dihydropyranes **6** by Directly Using Aqueous Acetaldehyde

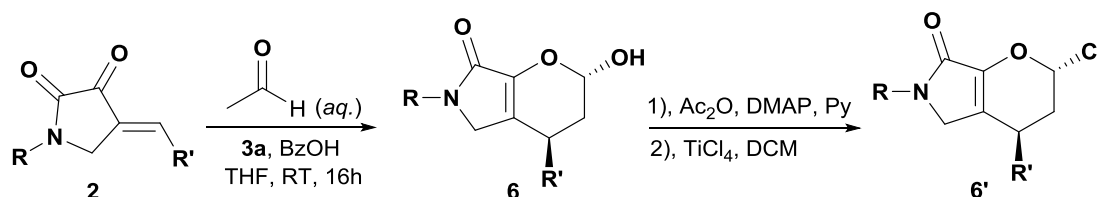

A glass tube was charged with pyrrolidine-2,3-dione **2** (0.2 mmol), amine catalyst **3a** (0.04 mmol, 13 mg) and benzoic acid (0.04 mmol, 4.9 mg) in 2 mL THF. The 40% aqueous acetaldehyde **5** (0.6 mmol, 66mg) was added with a syringe, and the reaction was sealed with a Teflon cap and stirred at room temperature for about 16 hours. When the reaction was complete, the mixture was directly purified by column chromatography on silica gel eluting with petroleum ether/ethyl acetate (4:1 to 1:1) to afford the corresponding bicyclic dihydropyranes **6**, which was analyzed by crude  $^1\text{H}$ -NMR to determine the diastereoselectivity of the *oxo*-IEDDA reaction. Since the diastereoisomers of **6** cannot be separated by simple column chromatography in most cases, we transform **6** to its analogue **6'** by using the following sequential reactions: a glass tube was charged with **6**, Ac<sub>2</sub>O (5 eq.) and DMAP (0.1 eq.) in 1 mL pyridine, and the reaction was stirred at room temperature for about 2 hours. When the reaction was completed, 2 mL of 20% hydrochloric acid was added to the reaction mixture, and the organic material was extracted with ethyl acetate, washed with brine and dried over anhydrous Na<sub>2</sub>SO<sub>4</sub>, then concentrated under reduced pressure to give the corresponding acetylated compound; such compound was dissolved in 2 mL DCM under argon, and TiCl<sub>4</sub> (5 eq.) was added into the reaction mixture. The reaction was stirred at room temperature for about 16 hours. When the reaction was completed, 2 mL DCM and 1mL water was added to the reaction mixture. The organic layer was separated, dried over anhydrous Na<sub>2</sub>SO<sub>4</sub> and purified by column chromatography on silica gel eluting with petroleum ether/ethyl acetate (6:1 to 4:1) to afford the desired pure product **6'** (>95:5 d.r.) which was further analyzed by  $^1\text{H}$ -NMR,  $^{13}\text{C}$ -HMR, HRMS, chiral HPLC analysis, *etc.*

**(2S,4S)-6-benzyl-2-hydroxy-4-phenyl-3,4,5,6-tetrahydropyrano[2,3-c]pyrrol-7(2H)-one 6a**

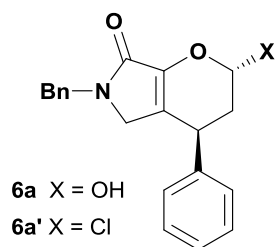

According to the general procedure, the crude product was purified via column chromatography delivering **6a** as a white solid with 95% yield. The diastereomeric ratio was determined to be 88:12 by crude  $^1\text{H-NMR}$  analysis. **6a** was transformed to its analogue **6a'** (only a single diastereoisomer was obtained) with 86% yield. The enantiomeric excess of **6a'** was determined to be 99% by chiral HPLC analysis on Chiralpak OD-H column (30% 2-propanol/*n*-hexane, 1 mL/min), UV 220 nm,  $t_{\text{major}} = 14.96$  min,  $t_{\text{minor}} = 20.92$  min;  $[\alpha]_{\text{D}}^{20} = +124.8$  ( $c = 0.32$  in  $\text{CH}_2\text{Cl}_2$ , data for **6a'**).

*NMR and HRMS data for the product 6a'* :

$^1\text{H NMR}$  (400 MHz,  $\text{CDCl}_3$ ):  $\delta$  (ppm): 7.35 – 7.27 (m, 6H), 7.21 – 7.15 (m, 4H), 6.44 (t,  $J = 2.4$  Hz, 1H), 4.75 (d,  $J = 14.8$  Hz, 1H), 4.44 (d,  $J = 14.8$  Hz, 1H), 4.07 (dd,  $J = 11.6$  Hz,  $J = 6.0$  Hz, 1H), 3.58 (dd,  $J = 18.4$  Hz,  $J = 1.6$  Hz, 1H), 3.46 (dd,  $J = 18.4$  Hz,  $J = 1.6$  Hz, 1H), 2.53 – 2.47 (m, 1H), 2.40 – 2.33 (m, 1H).

$^{13}\text{C NMR}$  (100 MHz,  $\text{CDCl}_3$ ):  $\delta$  (ppm): 164.3, 141.8, 139.6, 136.7, 129.1, 128.8, 128.0, 127.9, 127.7, 127.6, 125.3, 88.4, 47.4, 46.5, 39.6, 34.7

**HRMS (ESI):**  $m/z$  calculated for  $\text{C}_{20}\text{H}_{18}\text{ClNO}_2\text{Na}^+$ : 362.0924, found: 362.0927.

**(2S,4S)-2-hydroxy-6-(4-methoxybenzyl)-4-phenyl-3,4,5,6-tetrahydropyrano[2,3-c]pyrrol-7(2H)-one 6b**

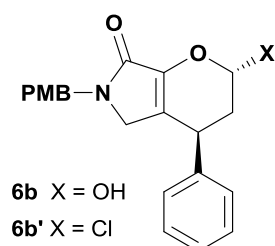

According to the general procedure, the crude product was purified via column chromatography delivering **6b** as a white solid with 90% yield. The diastereomeric ratio was determined to be 89:11 by crude  $^1\text{H-NMR}$  analysis. **6b** was transformed to its analogue **6b'** (only a single diastereoisomer was obtained) with 81% yield. The enantiomeric excess of **6b'** was determined to be 95% by chiral HPLC analysis on Chiralpak AD-H column (20% 2-propanol/*n*-hexane, 1 mL/min), UV 220 nm,  $t_{\text{major}} = 22.87$  min,  $t_{\text{minor}} = 26.50$  min;  $[\alpha]_{\text{D}}^{20} = +56.6$  ( $c = 0.54$  in  $\text{CH}_2\text{Cl}_2$ , data for **6b'**).

*NMR and HRMS data for the product 6b'* :

**<sup>1</sup>H NMR (400 MHz, CDCl<sub>3</sub>):** δ (ppm): 7.29 – 7.21 (m, 3H), 7.10 – 7.05 (m, 4H), 6.76 (d, *J* = 8.4 Hz, 2H), 6.36 (t, *J* = 2.4 Hz, 1H), 4.63 (d, *J* = 14.8 Hz, 1H), 4.29 (d, *J* = 14.8 Hz, 1H), 3.98 (dd, *J* = 11.6 Hz, *J* = 6.0 Hz, 1H), 3.71 (s, 3H), 3.48 (dd, *J* = 18.4 Hz, *J* = 1.6 Hz, 1H), 3.36 (dd, *J* = 18.4 Hz, *J* = 1.6 Hz, 1H), 2.45 – 2.39 (m, 1H), 2.32 – 2.25 (m, 1H).

**<sup>13</sup>C NMR (100 MHz, CDCl<sub>3</sub>):** δ (ppm): 164.2, 159.1, 141.9, 139.7, 129.5, 129.1, 128.8, 127.9, 127.7, 125.2, 114.1, 88.4, 55.3, 47.3, 45.9, 39.6, 34.8

**HRMS (ESI):** *m/z* calculated for C<sub>21</sub>H<sub>20</sub>ClNO<sub>3</sub>Na<sup>+</sup>: 392.1029, found: 392.1030.

**(2*S*,4*S*)-6-benzyl-4-(4-bromophenyl)-2-hydroxy-3,4,5,6-tetrahydropyrano[2,3-*c*]pyrrol-7(2*H*)-one**  
**6c**

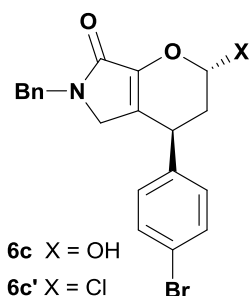

According to the general procedure, the crude product was purified via column chromatography delivering **6c** as a white solid with 88% yield. The diastereomeric ratio was determined to be 85:15 by crude <sup>1</sup>H-NMR analysis. **6c** was transformed to its analogue **6c'** (only a single diastereoisomer was obtained) with 80% yield. The enantiomeric excess of **6c'** was determined to be 97% by chiral HPLC analysis on Chiralpak OD-H column (30% 2-propanol/*n*-hexane, 1 mL/min), UV 220 nm, *t*<sub>major</sub> = 16.79 min, *t*<sub>minor</sub> = 22.55 min; [*α*]<sub>D</sub><sup>20</sup> = +121.6 (*c* = 0.32 in CH<sub>2</sub>Cl<sub>2</sub>, data for **6c'**).

*NMR and HRMS data for the product 6c'* :

**<sup>1</sup>H NMR (400 MHz, CDCl<sub>3</sub>):** δ (ppm): 7.46 (d, *J* = 8.4 Hz, 2H), 7.34 – 7.27 (m, 3H), 7.21 – 7.19 (m, 2H), 7.05 (d, *J* = 8.4 Hz, 2H), 6.43 (t, *J* = 2.4 Hz, 1H), 4.74 (d, *J* = 14.8 Hz, 1H), 4.45 (d, *J* = 14.8 Hz, 1H), 4.04 (dd, *J* = 11.6 Hz, *J* = 6.0 Hz, 1H), 3.56 (dd, *J* = 18.4 Hz, *J* = 1.6 Hz, 1H), 3.43 (dd, *J* = 18.4 Hz, *J* = 1.6 Hz, 1H), 2.51 – 2.46 (m, 1H), 2.35 – 2.28 (m, 1H).

**<sup>13</sup>C NMR (100 MHz, CDCl<sub>3</sub>):** δ (ppm): 164.1, 142.1, 138.6, 136.6, 132.3, 129.6, 128.8, 128.1, 127.8, 124.4, 121.7, 88.2, 47.3, 46.5, 39.5, 34.3

**HRMS (ESI):** *m/z* calculated for C<sub>20</sub>H<sub>17</sub>BrClNO<sub>2</sub>Na<sup>+</sup>: 440.0029, found: 440.0030.

**(2*S*,4*S*)-6-benzyl-4-(4-chlorophenyl)-2-hydroxy-3,4,5,6-tetrahydropyrano[2,3-*c*]pyrrol-7(2*H*)-one**  
**6d**

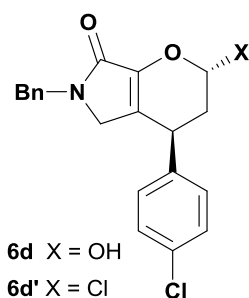

According to the general procedure, the crude product was purified via column chromatography delivering **6d** as a white solid with 92% yield. The diastereomeric ratio was determined to be 85:15 by crude  $^1\text{H-NMR}$  analysis. **6d** was transformed to its analogue **6d'** (only a single diastereoisomer was obtained) with 84% yield. The enantiomeric excess of **6c'** was determined to be 95% by chiral HPLC analysis on Chiralpak AD-H column (30% 2-propanol/*n*-hexane, 1 mL/min), UV 220 nm,  $t_{\text{major}} = 13.38$  min,  $t_{\text{minor}} = 14.79$  min;  $[\alpha]_{\text{D}}^{20} = +56.8$  ( $c = 0.94$  in  $\text{CH}_2\text{Cl}_2$ , data for **6d'**).

*NMR and HRMS data for the product 6d'* :

$^1\text{H NMR}$  (400 MHz,  $\text{CDCl}_3$ ):  $\delta$  (ppm): 7.34 – 7.26 (m, 5H), 7.21 – 7.19 (m, 2H), 7.12 – 7.09 (m, 2H), 6.43 (t,  $J = 2.4$  Hz, 1H), 4.74 (d,  $J = 14.8$  Hz, 1H), 4.45 (d,  $J = 14.8$  Hz, 1H), 4.06 (dd,  $J = 11.6$  Hz,  $J = 6.0$  Hz, 1H), 3.57 (dd,  $J = 18.4$  Hz,  $J = 1.6$  Hz, 1H), 3.43 (dd,  $J = 18.4$  Hz,  $J = 1.6$  Hz, 1H), 2.51 – 2.46 (m, 1H), 2.35 – 2.28 (m, 1H).

$^{13}\text{C NMR}$  (100 MHz,  $\text{CDCl}_3$ ):  $\delta$  (ppm): 164.1, 142.0, 138.1, 136.6, 133.6, 129.3, 129.2, 128.8, 128.1, 127.7, 124.6, 88.2, 47.3, 46.5, 39.5, 34.2

**HRMS (ESI)**:  $m/z$  calculated for  $\text{C}_{20}\text{H}_{17}\text{Cl}_2\text{NO}_2\text{Na}^+$ : 396.0534, found: 396.0535.

**(2*S*,4*S*)-6-benzyl-4-(4-fluorophenyl)-2-hydroxy-3,4,5,6-tetrahydropyrano[2,3-*c*]pyrrol-7(2*H*)-one**  
**6e**

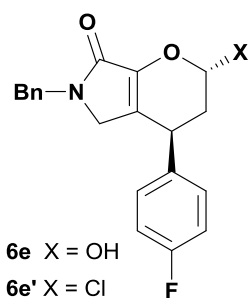

According to the general procedure, the crude product was purified via column chromatography delivering **6e** as a white solid with 98% yield. The diastereomeric ratio was determined to be 87:13 by crude  $^1\text{H-NMR}$  analysis. **6e** was transformed to its analogue **6e'** (only a single diastereoisomer was obtained) with 85% yield. The enantiomeric excess of **6e'** was determined to be 96% by chiral HPLC analysis on Chiralpak AD-H column (30% 2-propanol/*n*-hexane, 1 mL/min), UV 220 nm,  $t_{\text{major}} = 12.89$  min,  $t_{\text{minor}} = 14.60$  min;  $[\alpha]_{\text{D}}^{20} = +58.3$  ( $c = 1.21$  in  $\text{CH}_2\text{Cl}_2$ , data for **6e'**).

*NMR and HRMS data for the product 6e'* :

$^1\text{H NMR}$  (400 MHz,  $\text{CDCl}_3$ ):  $\delta$  (ppm): 7.33 – 7.25 (m, 3H), 7.21 – 7.19 (m, 2H), 7.15 – 7.12 (m, 2H), 7.05 – 6.99 (m, 2H), 6.43 (t,  $J = 2.4$  Hz, 1H), 4.74 (d,  $J = 14.8$  Hz, 1H), 4.45 (d,  $J = 14.8$  Hz, 1H), 4.07 (dd,  $J = 11.6$  Hz,  $J = 6.0$  Hz, 1H), 3.57 (dd,  $J = 18.4$  Hz,  $J = 1.6$  Hz, 1H), 3.43 (dd,  $J = 18.4$  Hz,  $J = 1.6$  Hz, 1H), 2.52 – 2.46 (m, 1H), 2.36 – 2.29 (m, 1H).

$^{13}\text{C NMR}$  (100 MHz,  $\text{CDCl}_3$ ):  $\delta$  (ppm): 164.2, 163.3, 160.9, 141.9, 136.6, 135.3, 135.2, 129.4, 129.3, 128.8, 128.0, 127.7, 124.9, 116.2, 116.0, 88.3, 47.3, 46.5, 39.7, 34.1

**HRMS (ESI)**:  $m/z$  calculated for  $\text{C}_{20}\text{H}_{17}\text{ClFNO}_2\text{Na}^+$ : 380.0830, found: 380.0828.

**(2S,4S)-6-benzyl-4-(3-bromophenyl)-2-hydroxy-3,4,5,6-tetrahydropyrano[2,3-c]pyrrol-7(2H)-one**  
**6f**

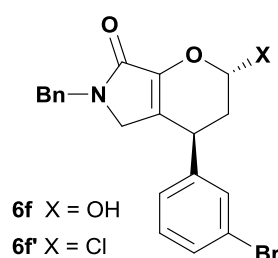

According to the general procedure, the crude product was purified via column chromatography delivering **6f** as a white solid with 97% yield. The diastereomeric ratio was determined to be 86:14 by crude  $^1\text{H-NMR}$  analysis. **6f** was transformed to its analogue **6f'** (only a single diastereoisomer was obtained) with 82% yield. The enantiomeric excess of **6f'** was determined to be 96% by chiral HPLC analysis on Chiralpak AD-H column (30% 2-propanol/*n*-hexane, 1 mL/min), UV 220 nm,  $t_{\text{minor}} = 13.32$  min,  $t_{\text{major}} = 15.70$  min;  $[\alpha]_{\text{D}}^{20} = +60.8$  ( $c = 0.97$  in  $\text{CH}_2\text{Cl}_2$ , data for **6f'**).

*NMR and HRMS data for the product 6f'* :

$^1\text{H NMR}$  (400 MHz,  $\text{CDCl}_3$ ):  $\delta$  (ppm): 7.43 – 7.41 (m, 1H), 7.34 – 7.26 (m, 4H), 7.23 – 7.19 (m, 3H), 7.11 – 7.08 (m, 1H), 6.43 (t,  $J = 2.4$  Hz, 1H), 4.77 (d,  $J = 14.8$  Hz, 1H), 4.45 (d,  $J = 14.8$  Hz, 1H), 4.04 (dd,  $J = 11.6$  Hz,  $J = 6.0$  Hz, 1H), 3.58 (dd,  $J = 18.4$  Hz,  $J = 1.6$  Hz, 1H), 3.45 (dd,  $J = 18.4$  Hz,  $J = 1.6$  Hz, 1H), 2.53 – 2.47 (m, 1H), 2.37 – 2.29 (m, 1H).

$^{13}\text{C NMR}$  (100 MHz,  $\text{CDCl}_3$ ):  $\delta$  (ppm): 164.1, 142.1, 142.0, 136.6, 131.0, 130.9, 130.7, 128.8, 128.0, 127.7, 126.5, 124.3, 123.1, 88.1, 47.3, 46.5, 39.4, 34.5

**HRMS (ESI)**:  $m/z$  calculated for  $\text{C}_{20}\text{H}_{17}\text{BrClNO}_2\text{Na}^+$ : 440.0029, found: 440.0027.

**(2S,4R)-6-benzyl-4-(2-chlorophenyl)-2-hydroxy-3,4,5,6-tetrahydropyrano[2,3-c]pyrrol-7(2H)-one**  
**6g**

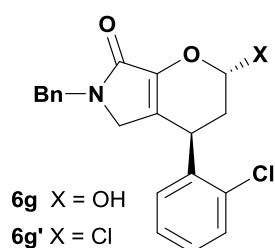

According to the general procedure, the crude product was purified via column chromatography delivering **6g** as a white solid with 95% yield. The diastereomeric ratio was determined to be 84:16 by crude  $^1\text{H-NMR}$  analysis. **6g** was transformed to its analogue **6g'** (only a single diastereoisomer was obtained) with 80% yield. The enantiomeric excess of **6g'** was determined to be 95% by chiral HPLC analysis on Chiralpak OD-H column (30% 2-propanol/*n*-hexane, 1 mL/min), UV 220 nm,  $t_{\text{major}} = 12.99$  min,  $t_{\text{minor}} = 18.38$  min;  $[\alpha]_{\text{D}}^{20} = +66.7$  ( $c = 1.06$  in  $\text{CH}_2\text{Cl}_2$ , data for **6g'**).

*NMR and HRMS data for the product 6g'* :

**<sup>1</sup>H NMR (400 MHz, CDCl<sub>3</sub>):** δ (ppm): 7.39 – 7.37 (m, 1H), 7.34 – 7.26 (m, 3H), 7.24 – 7.19 (m, 4H), 7.14 – 7.11 (m, 1H), 6.43 (t, *J* = 2.4 Hz, 1H), 4.72 (d, *J* = 14.8 Hz, 1H), 4.63 (br s, 1H), 4.52 (d, *J* = 14.8 Hz, 1H), 3.64 (dd, *J* = 18.4 Hz, *J* = 1.6 Hz, 1H), 3.53 (dd, *J* = 18.4 Hz, *J* = 1.6 Hz, 1H), 2.55 – 2.50 (m, 1H), 2.36 (br s, 1H).

**<sup>13</sup>C NMR (100 MHz, CDCl<sub>3</sub>):** δ (ppm): 164.3, 142.5, 137.1, 136.7, 134.1, 130.3, 129.0, 128.8, 128.0, 127.7, 127.6, 124.4, 88.3, 47.5, 46.5, 37.8, 29.7

**HRMS (ESI):** *m/z* calculated for C<sub>20</sub>H<sub>17</sub>Cl<sub>2</sub>NO<sub>2</sub>Na<sup>+</sup>: 396.0534, found: 396.0531.

**(2*S*,4*R*)-6-benzyl-4-(2,4-dichlorophenyl)-2-hydroxy-3,4,5,6-tetrahydropyrano[2,3-*c*]pyrrol-7(2*H*)-one 6h**

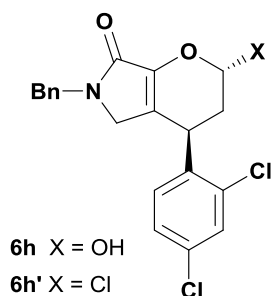

According to the general procedure, the crude product was purified via column chromatography delivering **6h** as a white solid with 86% yield. The diastereomeric ratio was determined to be 82:18 by crude <sup>1</sup>H-NMR analysis. **6h** was transformed to its analogue **6h'** (only a single diastereoisomer was obtained) with 78% yield. The enantiomeric excess of **6h'** was determined to be 96% by chiral HPLC analysis on Chiralpak AD-H column (30% 2-propanol/*n*-hexane, 1 mL/min), UV 220 nm, *t*<sub>major</sub> = 11.91 min, *t*<sub>minor</sub> = 17.52 min; [*α*]<sub>D</sub><sup>20</sup> = +48.7 (*c* = 1.22 in CH<sub>2</sub>Cl<sub>2</sub>, data for **6h'**).

*NMR and HRMS data for the product 6h'* :

**<sup>1</sup>H NMR (400 MHz, CDCl<sub>3</sub>):** δ (ppm): 7.40 (d, *J* = 2.4 Hz, 1H), 7.34 – 7.25 (m, 3H), 7.24 – 7.20 (m, 3H), 7.06 (d, *J* = 8.4 Hz, 1H), 6.43 (t, *J* = 2.4 Hz, 1H), 4.70 (d, *J* = 14.8 Hz, 1H), 4.59 (br s, 1H), 4.53 (d, *J* = 14.8 Hz, 1H), 3.63 (dd, *J* = 18.4 Hz, *J* = 1.6 Hz, 1H), 3.50 (dd, *J* = 18.4 Hz, *J* = 1.6 Hz, 1H), 2.53 – 2.48 (m, 1H), 2.32 (br s, 1H).

**<sup>13</sup>C NMR (100 MHz, CDCl<sub>3</sub>):** δ (ppm): 164.0, 142.7, 136.5, 135.6, 134.7, 134.1, 130.1, 128.8, 128.2, 128.0, 127.9, 127.8, 123.6, 88.0, 47.3, 46.5, 37.8, 29.7

**HRMS (ESI):** *m/z* calculated for C<sub>20</sub>H<sub>16</sub>Cl<sub>3</sub>NO<sub>2</sub>Na<sup>+</sup>: 430.0144, found: 430.0142.

**(2*S*,4*S*)-6-benzyl-2-hydroxy-4-(*p*-tolyl)-3,4,5,6-tetrahydropyrano[2,3-*c*]pyrrol-7(2*H*)-one 6i**

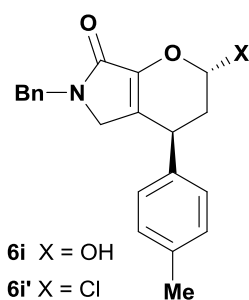



According to the general procedure, the crude product was purified via column chromatography delivering **6i** as a white solid with 91% yield. The diastereomeric ratio was determined to be 86:14 by crude <sup>1</sup>H-NMR analysis. **6i** was transformed to its analogue **6i'** (only a single diastereoisomer was obtained) with 83% yield. The enantiomeric excess of **6i'** was determined to be 95% by chiral HPLC analysis on Chiralpak AD-H column (25% 2-propanol/*n*-hexane, 1 mL/min), UV 220 nm, *t*<sub>major</sub> = 11.76 min, *t*<sub>minor</sub> = 12.88 min; [ $\alpha$ ]<sub>D</sub><sup>20</sup> = +35.4 (*c* = 1.14 in CH<sub>2</sub>Cl<sub>2</sub>, data for **6i'**).

*NMR and HRMS data for the product 6i'* :

<sup>1</sup>H NMR (400 MHz, CDCl<sub>3</sub>):  $\delta$  (ppm): 7.33 – 7.26 (m, 3H), 7.21 – 7.18 (m, 2H), 7.13 (d, *J* = 7.8 Hz, 2H), 7.04 (d, *J* = 7.8 Hz, 2H), 6.43 (t, *J* = 2.4 Hz, 1H), 4.74 (d, *J* = 14.8 Hz, 1H), 4.44 (d, *J* = 14.8 Hz, 1H), 4.03 (dd, *J* = 11.6 Hz, *J* = 6.0 Hz, 1H), 3.56 (dd, *J* = 18.4 Hz, *J* = 1.6 Hz, 1H), 3.46 (dd, *J* = 18.4 Hz, *J* = 1.6 Hz, 1H), 2.50 – 2.44 (m, 1H), 2.38 – 2.31 (m, 4H).

<sup>13</sup>C NMR (100 MHz, CDCl<sub>3</sub>):  $\delta$  (ppm): 164.3, 141.7, 137.5, 136.7, 136.5, 129.8, 128.7, 128.0, 127.7, 127.6, 125.6, 88.5, 47.5, 46.5, 39.7, 34.3, 21.0

HRMS (ESI): *m/z* calculated for C<sub>21</sub>H<sub>20</sub>ClNO<sub>2</sub>Na<sup>+</sup>: 376.1080, found: 376.1083.

**(2*S*,4*S*)-6-benzyl-2-hydroxy-4-(4-methoxyphenyl)-3,4,5,6-tetrahydropyrano[2,3-*c*]pyrrol-7(2*H*)-one 6j**

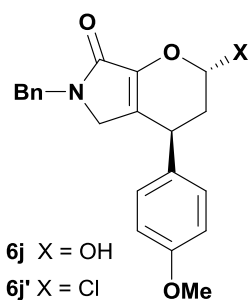

According to the general procedure, the crude product was purified via column chromatography delivering **6j** as a white solid with 95% yield. The diastereomeric ratio was determined to be 85:15 by crude <sup>1</sup>H-NMR analysis. **6j** was transformed to its analogue **6j'** (only a single diastereoisomer was obtained) with 84% yield. The enantiomeric excess of **6j'** was determined to be 95% by chiral HPLC analysis on Chiralpak AD-H column (30% 2-propanol/*n*-hexane, 1 mL/min), UV 220 nm, *t*<sub>minor</sub> = 15.36 min, *t*<sub>major</sub> = 16.89 min; [ $\alpha$ ]<sub>D</sub><sup>20</sup> = +115.0 (*c* = 0.23 in CH<sub>2</sub>Cl<sub>2</sub>, data for **6j'**).

*NMR and HRMS data for the product 6j'* :

<sup>1</sup>H NMR (400 MHz, CDCl<sub>3</sub>):  $\delta$  (ppm): 7.26 – 7.19 (m, 3H), 7.14 – 7.11 (m, 2H), 7.02 – 6.99 (m, 2H), 6.80 – 6.76 (m, 2H), 6.36 (t, *J* = 2.4 Hz, 1H), 4.67 (d, *J* = 14.8 Hz, 1H), 4.37 (d, *J* = 14.8 Hz, 1H), 3.95 (dd, *J* = 11.6 Hz, *J* = 6.0 Hz, 1H), 3.72 (s, 3H), 3.49 (dd, *J* = 18.4 Hz, *J* = 1.6 Hz, 1H), 3.37 (dd, *J* = 18.4 Hz, *J* = 1.6 Hz, 1H), 2.43 – 2.37 (m, 1H), 2.29 – 2.22 (m, 1H).

<sup>13</sup>C NMR (100 MHz, CDCl<sub>3</sub>):  $\delta$  (ppm): 164.4, 159.1, 141.7, 136.8, 131.5, 128.9, 128.7, 128.1, 127.7, 125.8, 114.5, 88.6, 55.3, 47.5, 46.5, 39.7, 33.9

HRMS (ESI): *m/z* calculated for C<sub>21</sub>H<sub>20</sub>ClNO<sub>3</sub>Na<sup>+</sup>: 392.1029, found: 392.1030.

**(2*S*,4*S*)-6-benzyl-2-hydroxy-4-(2-methoxyphenyl)-3,4,5,6-tetrahydropyrano[2,3-*c*]pyrrol-7(2*H*)-one 6k**

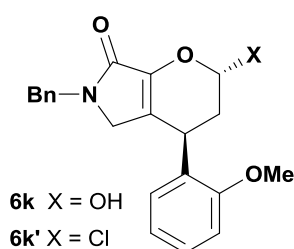

According to the general procedure, the crude product was purified via column chromatography delivering **6k** as a white solid with 90% yield. The diastereomeric ratio was determined to be 86:14 by crude <sup>1</sup>H-NMR analysis. **6k** was transformed to its analogue **6k'** (only a single diastereoisomer was obtained) with 81% yield. The enantiomeric excess of **6k'** was determined to be 96% by chiral HPLC analysis on Chiralpak AD-H column (30% 2-propanol/*n*-hexane, 1 mL/min), UV 220 nm, *t*<sub>major</sub> = 16.28 min, *t*<sub>minor</sub> = 21.60 min; [ $\alpha$ ]<sub>D</sub><sup>20</sup> = +78.5 (*c* = 0.46 in CH<sub>2</sub>Cl<sub>2</sub>, data for **6k'**).

*NMR and HRMS data for the product 6k'* :

**<sup>1</sup>H NMR (400 MHz, CDCl<sub>3</sub>):**  $\delta$  (ppm): 7.32 – 7.25 (m, 3H), 7.24 – 7.18 (m, 3H), 7.08 (dd, *J* = 7.2 Hz, *J* = 1.6 Hz, 1H), 6.91 (t, *J* = 7.2 Hz, 1H), 6.85 (d, *J* = 8.4 Hz, 1H), 6.44 (t, *J* = 2.4 Hz, 1H), 4.60 (dd, *J* = 17.2 Hz, *J* = 15.2 Hz, 1H), 4.42 (dd, *J* = 11.6 Hz, *J* = 6.0 Hz, 1H), 3.72 (s, 3H), 3.59 (dd, *J* = 18.4 Hz, *J* = 1.6 Hz, 1H), 3.43 (dd, *J* = 18.4 Hz, *J* = 1.6 Hz, 1H), 2.53 – 2.46 (m, 1H), 2.41 – 2.35 (m, 1H).

**<sup>13</sup>C NMR (100 MHz, CDCl<sub>3</sub>):**  $\delta$  (ppm): 164.6, 157.3, 141.1, 137.0, 129.2, 128.8, 128.7, 127.9, 127.6, 127.3, 126.3, 121.0, 110.9, 89.0, 55.2, 47.6, 46.4, 37.1, 29.7

**HRMS (ESI):** *m/z* calculated for C<sub>21</sub>H<sub>20</sub>ClNO<sub>3</sub>Na<sup>+</sup>: 392.1029, found: 392.1030.

**(2*S*,4*S*)-6-benzyl-2-hydroxy-4-((*E*)-styryl)-3,4,5,6-tetrahydropyrano[2,3-*c*]pyrrol-7(2*H*)-one 6l**

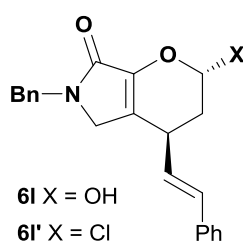

According to the general procedure, the crude product was purified via column chromatography delivering **6l** as a white solid with 89% yield. The diastereomeric ratio was determined to be 82:18 by crude <sup>1</sup>H-NMR analysis. **6l** was transformed to its analogue **6l'** (only a single diastereoisomer was obtained) with 70% yield. The enantiomeric excess of **6l'** was determined to be 90% by chiral HPLC analysis on Chiralpak AD-H column (20% 2-propanol/*n*-hexane, 1 mL/min), UV 220 nm, *t*<sub>major</sub> = 9.83 min, *t*<sub>minor</sub> = 18.29 min; [ $\alpha$ ]<sub>D</sub><sup>20</sup> = +138.5 (*c* = 0.38 in CH<sub>2</sub>Cl<sub>2</sub>, data for **6l'**).

*NMR and HRMS data for the product 6l'* :

**<sup>1</sup>H NMR (400 MHz, CDCl<sub>3</sub>):** δ (ppm): 7.34 – 7.28 (m, 7H), 7.25 – 7.23 (m, 3H), 6.60 (d, *J* = 15.6 Hz, 1H), 6.42 (t, *J* = 2.4 Hz, 1H), 5.96 (dd, *J* = 15.6 Hz, *J* = 8.8 Hz, 1H), 4.62 (q, *J* = 14.8 Hz, 2H), 3.71 – 3.70 (m, 3H), 2.43 – 2.37 (m, 1H), 2.23 – 2.16 (m, 1H).

**<sup>13</sup>C NMR (100 MHz, CDCl<sub>3</sub>):** δ (ppm): 164.3, 141.0, 136.7, 136.0, 133.8, 128.8, 128.7, 128.2, 128.1, 127.7, 127.0, 126.3, 124.8, 88.3, 47.7, 46.6, 37.1, 32.4

**HRMS (ESI):** *m/z* calculated for C<sub>22</sub>H<sub>20</sub>ClNO<sub>2</sub>Na<sup>+</sup>: 388.1080, found: 388.1080.

**(2*S*,4*S*)-6-benzyl-2-hydroxy-4-(naphthalen-2-yl)-3,4,5,6-tetrahydropyrano[2,3-*c*]pyrrol-7(2*H*)-one 6m**

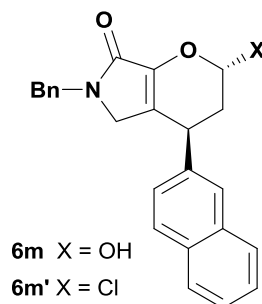

According to the general procedure, the crude product was purified via column chromatography delivering **6m** as a white solid with 83% yield. The diastereomeric ratio was determined to be 84:16 by crude <sup>1</sup>H-NMR analysis. **6m** was transformed to its analogue **6m'** (only a single diastereoisomer was obtained) with 82% yield. The enantiomeric excess of **6m'** was determined to be 96% by chiral HPLC analysis on Chiralpak AD-H column (25% 2-propanol/*n*-hexane, 1 mL/min), UV 220 nm, *t*<sub>minor</sub> = 17.36 min, *t*<sub>major</sub> = 33.53 min; [α]<sub>D</sub><sup>20</sup> = +45.4 (*c* = 1.21 in CH<sub>2</sub>Cl<sub>2</sub>, data for **6m'**).

*NMR and HRMS data for the product 6m' :*

**<sup>1</sup>H NMR (400 MHz, CDCl<sub>3</sub>):** δ (ppm): 7.83 – 7.76 (m, 3H), 7.66 (br s, 1H), 7.53 – 7.46 (m, 2H), 7.31 – 7.22 (m, 4H), 7.19 – 7.17 (m, 2H), 6.48 (t, *J* = 2.4 Hz, 1H), 4.75 (d, *J* = 14.8 Hz, 1H), 4.42 (d, *J* = 14.8 Hz, 1H), 4.24 (dd, *J* = 11.6 Hz, *J* = 6.0 Hz, 1H), 3.59 (dd, *J* = 18.4 Hz, *J* = 1.6 Hz, 1H), 3.45 (dd, *J* = 18.4 Hz, *J* = 1.6 Hz, 1H), 2.59 – 2.45 (m, 2H).

**<sup>13</sup>C NMR (100 MHz, CDCl<sub>3</sub>):** δ (ppm): 164.3, 141.9, 136.9, 136.6, 133.4, 132.7, 129.1, 128.7, 128.1, 127.7, 127.6, 127.5, 127.1, 126.6, 126.3, 125.3, 125.2, 88.4, 47.5, 46.5, 39.4, 34.9

**HRMS (ESI):** *m/z* calculated for C<sub>24</sub>H<sub>20</sub>ClNO<sub>2</sub>Na<sup>+</sup>: 412.1080, found: 412.1081.

## 5. Procedure for Synthetic Transformations of 4a

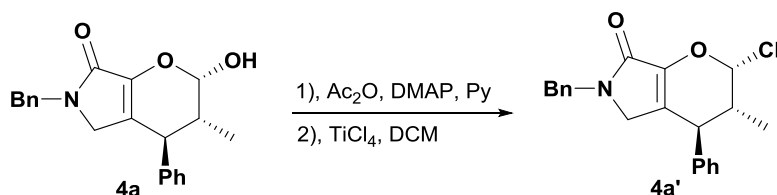

A dry glass tube was charged with **4a** (33.5 mg, 0.1 mmol), Ac<sub>2</sub>O (51 mg, 0.5 mmol) and DMAP (1.2 mg, 0.01 mmol) in 1 mL pyridine, and the reaction was stirred at room

temperature for 2 hours. When the reaction was completed, 2 mL of 20% hydrochloric acid was added to the reaction mixture, and the organic material was extracted with ethyl acetate, washed with brine and dried over anhydrous  $\text{Na}_2\text{SO}_4$ , then concentrated under reduced pressure to give the corresponding acetylated compound; such compound was dissolved in 2 mL of DCM under argon, and  $\text{TiCl}_4$  (94.5 mg, 0.5 mmol) was added into the reaction mixture. The reaction was stirred at room temperature for 16 hours. When the reaction was completed, 2 mL DCM and 1 mL water was added to the reaction mixture. The organic layer was separated, dried over anhydrous  $\text{Na}_2\text{SO}_4$  and purified by column chromatography on silica gel eluting with petroleum ether/ethyl acetate (6:1 to 4:1) to afford the desired pure product **4a'** as a white solid with 88% yield. The diastereomeric ratio was determined to be >95:5 by crude  $^1\text{H-NMR}$  analysis, and the enantiomeric excess was determined to be 99% by chiral HPLC analysis on Chiralpak AD-H column (30% 2-propanol/*n*-hexane, 1 mL/min), UV 220 nm,  $t_{\text{major}} = 23.32$  min,  $t_{\text{minor}} = 25.87$  min;  $[\alpha]_{\text{D}}^{20} = +190.2$  ( $c = 0.67$  in  $\text{CH}_2\text{Cl}_2$ ).

*NMR and HRMS data for the product 4a'*:

$^1\text{H NMR}$  (400 MHz,  $\text{CDCl}_3$ ):  $\delta$  (ppm): 7.35 – 7.23 (m, 6H), 7.20 – 7.17 (m, 2H), 7.13 – 7.11 (m, 2H), 6.21 (d,  $J = 2.4$  Hz, 1H), 4.74 (d,  $J = 14.8$  Hz, 1H), 4.42 (d,  $J = 14.8$  Hz, 1H), 3.55 – 3.49 (m, 2H), 3.37 (d,  $J = 18.4$  Hz, 1H), 2.47 – 2.38 (m, 1H), 0.94 (d,  $J = 6.8$  Hz, 3H).

$^{13}\text{C NMR}$  (100 MHz,  $\text{CDCl}_3$ ):  $\delta$  (ppm): 164.4, 141.7, 138.7, 136.7, 129.0, 128.7, 128.4, 128.0, 127.7, 127.6, 126.1, 94.4, 47.3, 46.5, 42.0, 41.9, 14.8

**HRMS (ESI):**  $m/z$  calculated for  $\text{C}_{21}\text{H}_{20}\text{ClNO}_2\text{Na}^+$ : 376.1080, found: 376.1077.

- In order to rationalize the configuration of newly formed C-Cl bond in the chloro-compound **4a'**, a proposed reaction mechanism and transition state of the above synthetic transformation was described. As shown in the following scheme, the Ac protected hydroxyl group was firstly eliminated in the presence of Lewis acid. Then, because of anomeric effect of the dihydropyran, the nucleophilic chloride preferred to attack the oxonium intermediate from the bottom face, generating a configurationally favored axial bond. Thus, the corresponding product **4a'** with excellent stereoselectivity was obtained.

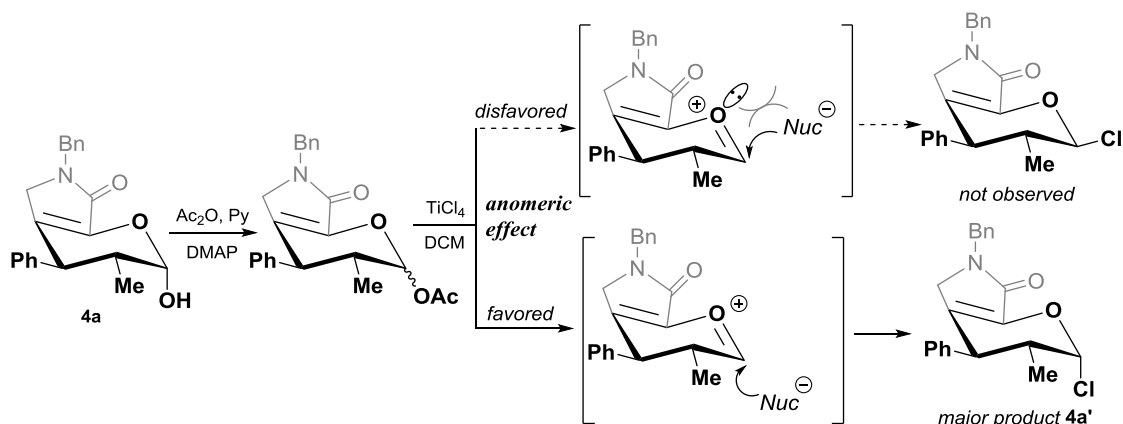

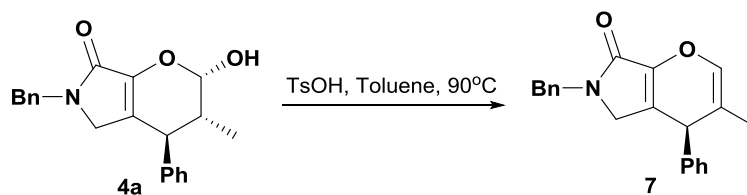

A dry glass tube was charged with **4a** (33.5 mg, 0.1 mmol), TsOH (86 mg, 0.5 mmol) in 1 mL toluene, and the reaction was stirred at 90 °C for 2 hours. When the reaction was completed, the reaction mixture was directly purified by column chromatography on silica gel eluting with petroleum ether/ethyl acetate (6:1 to 4:1) to afford the desired pure product **7** as a white solid with 85% yield. The enantiomeric excess was determined to be 99% by chiral HPLC analysis on Chiralpak AD-H column (20% 2-propanol/*n*-hexane, 1 mL/min), UV 220 nm,  $t_{\text{major}} = 16.47$  min,  $t_{\text{minor}} = 35.97$  min;  $[\alpha]_{\text{D}}^{20} = +10.4$  ( $c = 1.90$  in  $\text{CH}_2\text{Cl}_2$ ).

*NMR and HRMS data for the product 7:*

**$^1\text{H}$  NMR (400 MHz,  $\text{CDCl}_3$ ):**  $\delta$  (ppm): 7.33 – 7.22 (m, 6H), 7.19 – 7.16 (m, 4H), 6.51 (s, 1H), 4.82 (d,  $J = 14.8$  Hz, 1H), 4.31 (d,  $J = 14.8$  Hz, 1H), 4.08 (s, 1H), 3.53 (d,  $J = 18.4$  Hz, 1H), 3.34 (d,  $J = 18.4$  Hz, 1H), 1.42 (s, 3H).

**$^{13}\text{C}$  NMR (100 MHz,  $\text{CDCl}_3$ ):**  $\delta$  (ppm): 164.1, 141.4, 141.2, 136.7, 135.9, 128.8, 128.7, 128.0, 127.9, 127.6, 127.4, 123.1, 111.7, 47.3, 46.3, 43.2, 16.2

**HRMS (ESI):**  $m/z$  calculated for  $\text{C}_{21}\text{H}_{19}\text{NO}_2\text{Na}^+$ : 340.1313, found: 340.1316.

## 6. Crystal Data and Structure Refinement for the Enantiopure 4b

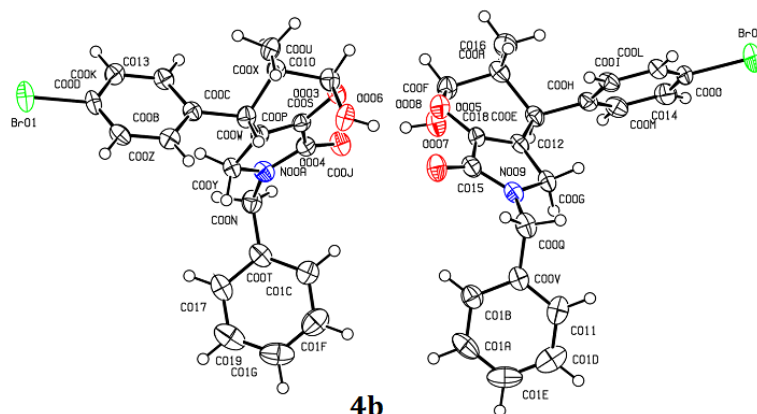

|                                               |                                                               |
|-----------------------------------------------|---------------------------------------------------------------|
| Identification code                           | <b>4b</b>                                                     |
| Empirical formula                             | $C_{42}H_{40}Br_2N_2O_6$                                      |
| Formula weight                                | 828.58                                                        |
| Temperature/K                                 | 292.71(10)                                                    |
| Crystal system                                | monoclinic                                                    |
| Space group                                   | $P2_1$                                                        |
| $a/\text{\AA}$                                | 9.5936(4)                                                     |
| $b/\text{\AA}$                                | 17.0134(7)                                                    |
| $c/\text{\AA}$                                | 12.4020(5)                                                    |
| $\alpha/^\circ$                               | 90                                                            |
| $\beta/^\circ$                                | 111.095(5)                                                    |
| $\gamma/^\circ$                               | 90                                                            |
| Volume/ $\text{\AA}^3$                        | 1888.61(14)                                                   |
| $Z$                                           | 2                                                             |
| $\rho_{\text{calc}}/\text{cm}^3$              | 1.457                                                         |
| $\mu/\text{mm}^{-1}$                          | 3.132                                                         |
| $F(000)$                                      | 848.0                                                         |
| Crystal size/ $\text{mm}^3$                   | $0.5 \times 0.3 \times 0.2$                                   |
| Radiation                                     | $\text{CuK}\alpha$ ( $\lambda = 1.54184$ )                    |
| $2\Theta$ range for data collection/ $^\circ$ | 9.244 to 134.144                                              |
| Index ranges                                  | $-10 \leq h \leq 11, -20 \leq k \leq 20, -13 \leq l \leq 14$  |
| Reflections collected                         | 20048                                                         |
| Independent reflections                       | 6542 [ $R_{\text{int}} = 0.0568, R_{\text{sigma}} = 0.0594$ ] |

Data/restraints/parameters 6542/1/473  
 Goodness-of-fit on  $F^2$  1.014  
 Final R indexes [ $I \geq 2\sigma(I)$ ]  $R_1 = 0.0546$ ,  $wR_2 = 0.1360$   
 Final R indexes [all data]  $R_1 = 0.0616$ ,  $wR_2 = 0.1437$   
 Largest diff. peak/hole /  $e \text{ \AA}^{-3}$  0.83/-0.52  
 Flack parameter 0.030(15)

- CCDC 1480846 (**4b**) contains the supplementary crystallographic data for this paper. These data can be obtained free of charge from the Cambridge Crystallographic Data Centre via [www.ccdc.cam.ac.uk/data\\_request/cif](http://www.ccdc.cam.ac.uk/data_request/cif).
- From the crystallographic data, an intermolecular hydrogen bonding interaction was observed. The data of such hydrogen bonding interaction is listed as follows:

Hydrogen bonds with  $H..A < r(A) + 2.000$  Angstroms and  $\langle DHA \rangle > 110$  deg.  
 Appropriate HTAB instructions appended to .res file for future use.

| D-H       | d(D-H) | d(H..A) | $\langle DHA \rangle$ | d(D..A) | A                          |
|-----------|--------|---------|-----------------------|---------|----------------------------|
| O006-H006 | 0.840  | 2.321   | 144.94                | 3.047   | O005                       |
| O006-H006 | 0.840  | 2.326   | 135.34                | 2.983   | O007                       |
| O008-H008 | 0.840  | 2.052   | 155.10                | 2.836   | O004                       |
| C00N-H00C | 0.990  | 2.597   | 116.61                | 3.167   | O006 [ -x+1, y-1/2, -z+1 ] |
| C00N-H00C | 0.990  | 2.472   | 170.48                | 3.452   | O007 [ -x+1, y-1/2, -z+1 ] |

## 7. References and notes

- [1] (a) E. Krell, *Handbook of Laboratory Distillation*, Elsevier Publishing Company, Amsterdam-London-New York, 1963; b) M. J. Rosengart, *The Technique of Distillation and Rectification in the Laboratory*, VEB Verlag Technik, Berlin, 1954; c) H. Stage *Columns for laboratory distillation*, *Angew. Chem.*, 1947, **B19**, 175.
- [2] P. L. Southwick, E. F. Barnas, *J. Org. Chem.*, 1962, **27**, 98.
- [3] For detail of the procedure for such function group transformation, see in page S27: *Procedure for Synthetic Transformations of 4a*.

## 8. NMR and HPLC Spectra of the Chiral Bicyclic Dihydropyranes

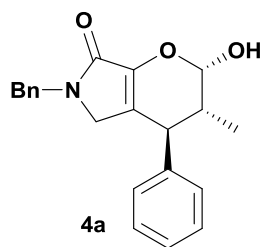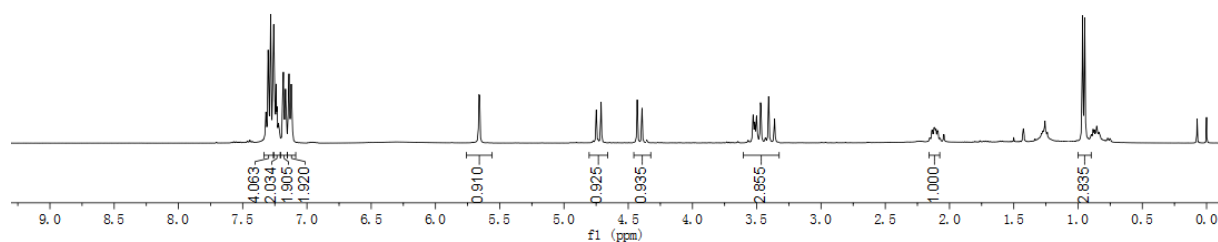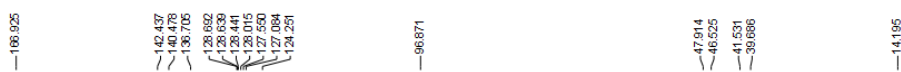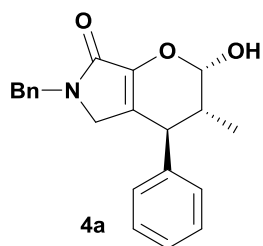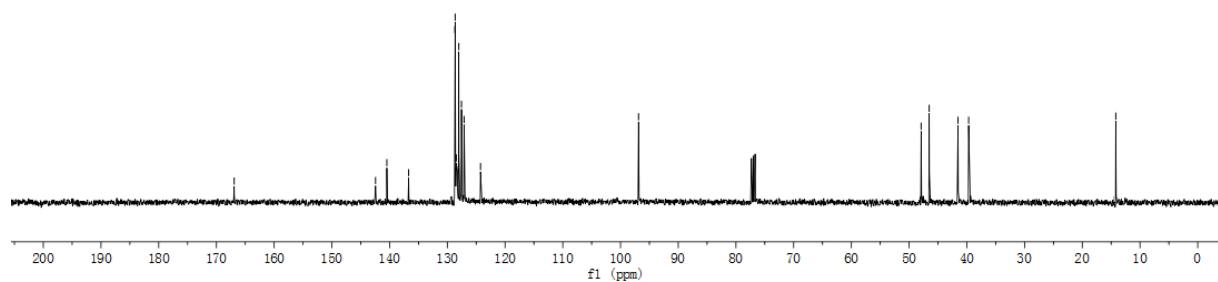



### Peak Analysis Report

| No. | Peak Name | Ret.Time (detected) | Area    | Rel.Area | Height  | Amount |
|-----|-----------|---------------------|---------|----------|---------|--------|
|     |           | min                 | mAU*min | %        | mAU     |        |
| 1   | n.a.      | 6.49                | 57.124  | 50.47    | 233.590 | n.a.   |
| 2   | n.a.      | 12.25               | 56.054  | 49.53    | 87.234  | n.a.   |

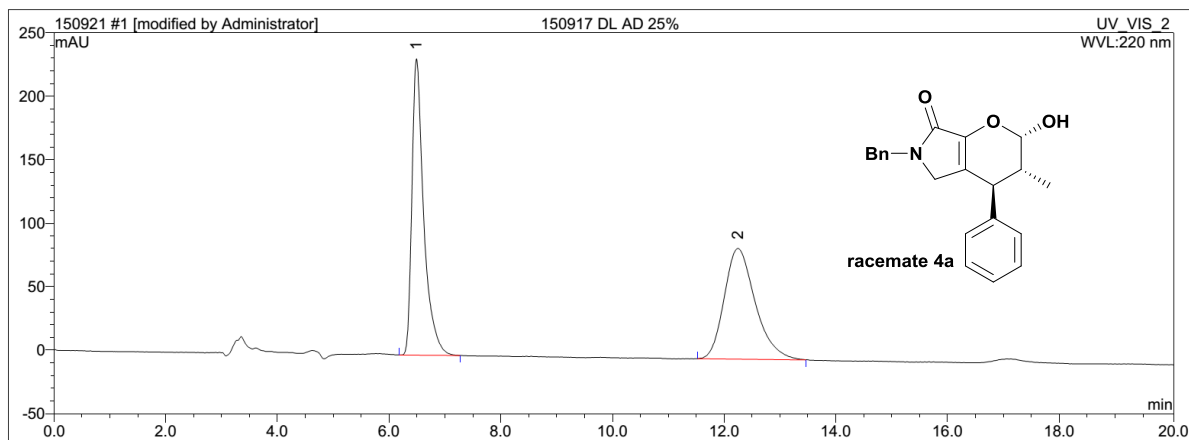

### Peak Analysis Report

| No. | Peak Name | Ret.Time (detected) | Area    | Rel.Area | Height  | Amount |
|-----|-----------|---------------------|---------|----------|---------|--------|
|     |           | min                 | mAU*min | %        | mAU     |        |
| 1   | n.a.      | 6.48                | 198.933 | 99.44    | 797.842 | n.a.   |
| 2   | n.a.      | 12.19               | 1.125   | 0.56     | 2.320   | n.a.   |

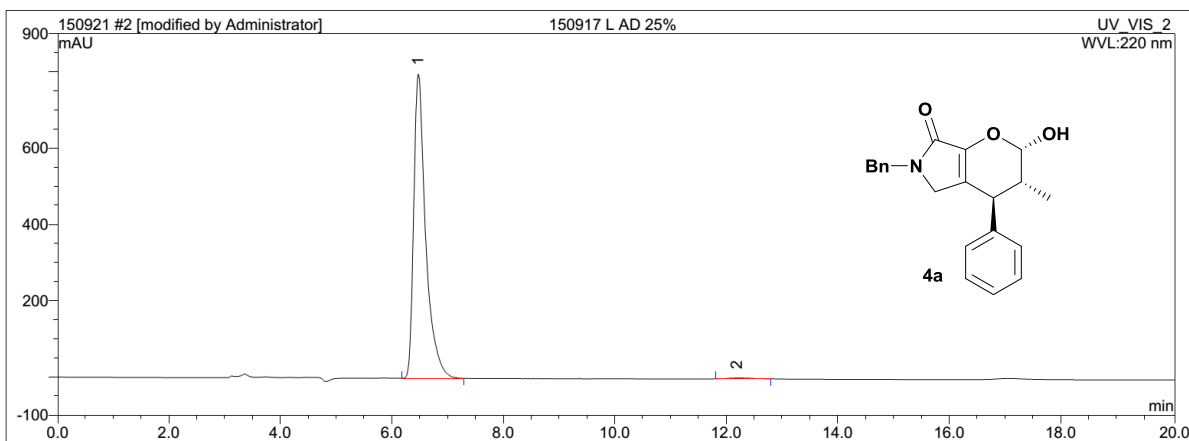

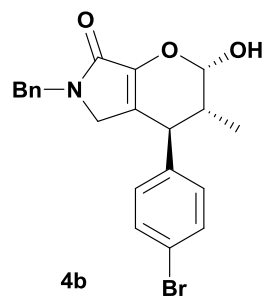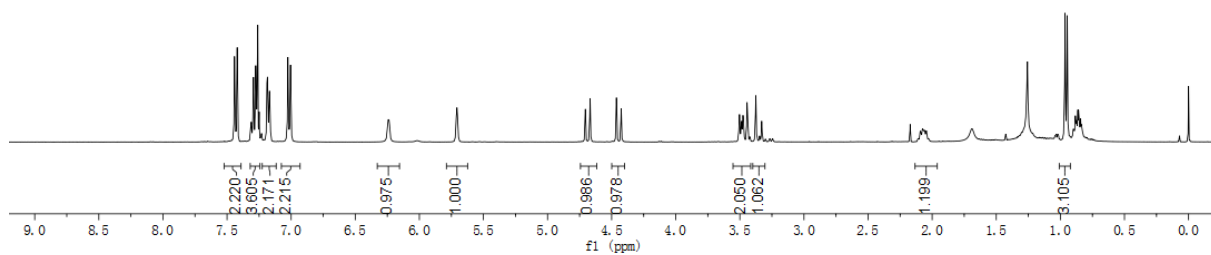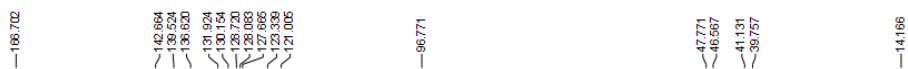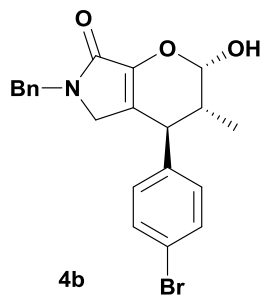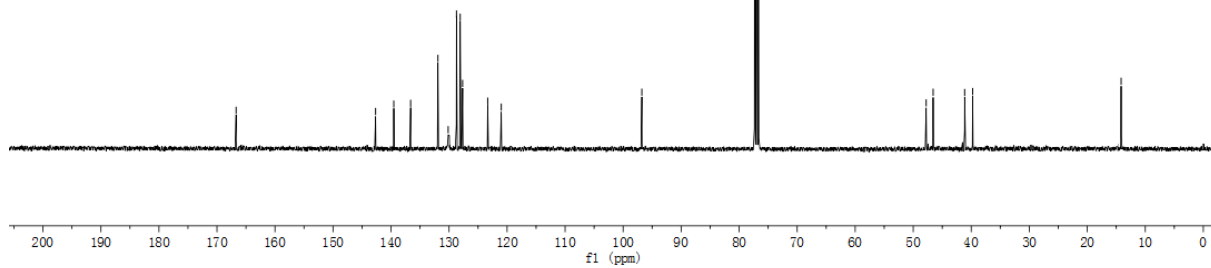

### Peak Analysis Report

| No. | Peak Name | Ret.Time (detected)<br>min | Area<br>mAU*min | Rel.Area<br>% | Height<br>mAU | Amount |
|-----|-----------|----------------------------|-----------------|---------------|---------------|--------|
| 1   | n.a.      | 6.43                       | 32.598          | 50.30         | 128.425       | n.a.   |
| 2   | n.a.      | 11.10                      | 32.211          | 49.70         | 59.416        | n.a.   |

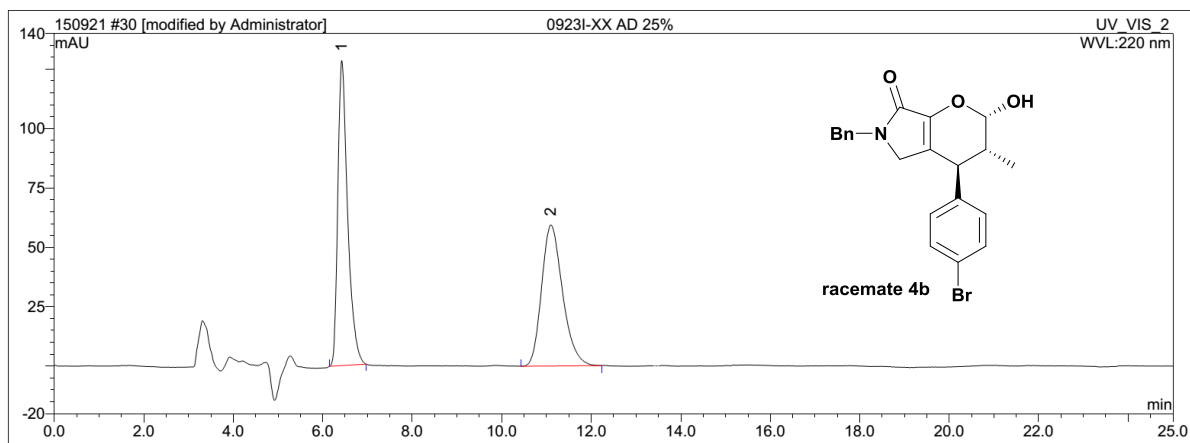

### Peak Analysis Report

| No. | Peak Name | Ret.Time (detected)<br>min | Area<br>mAU*min | Rel.Area<br>% | Height<br>mAU | Amount |
|-----|-----------|----------------------------|-----------------|---------------|---------------|--------|
| 1   | n.a.      | 6.43                       | 51.886          | 99.87         | 204.943       | n.a.   |
| 2   | n.a.      | 11.10                      | 0.068           | 0.13          | 0.369         | n.a.   |

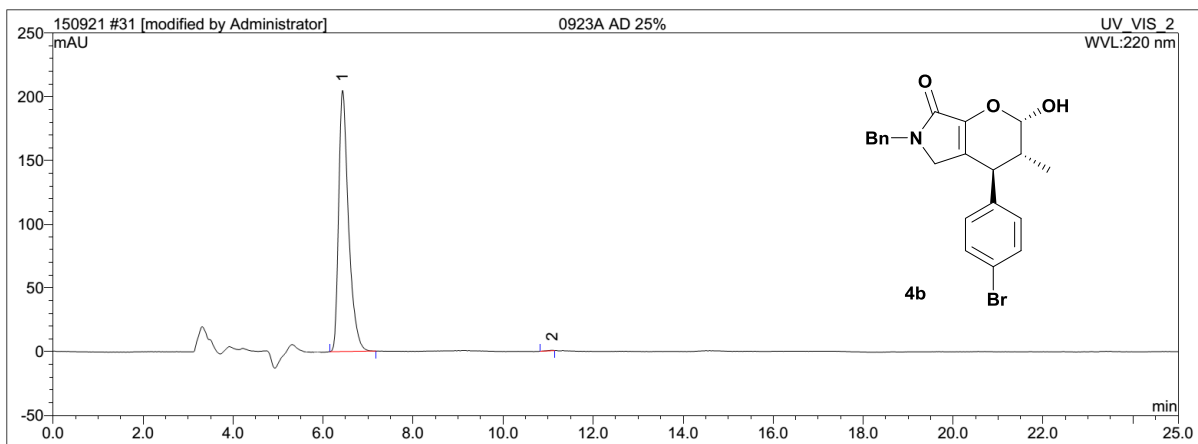

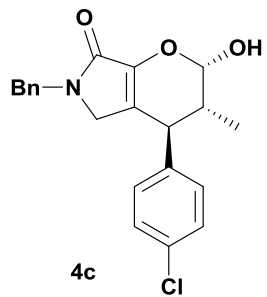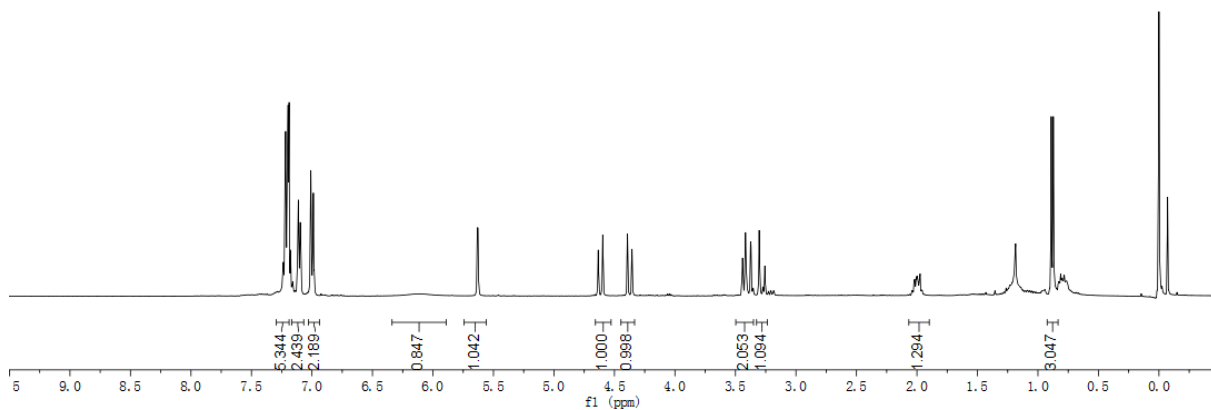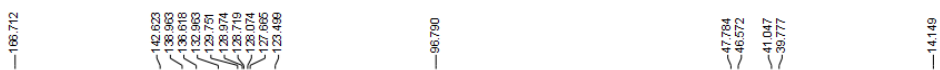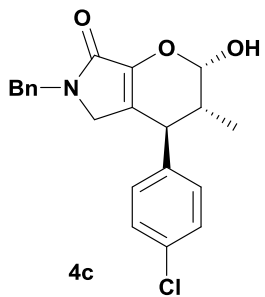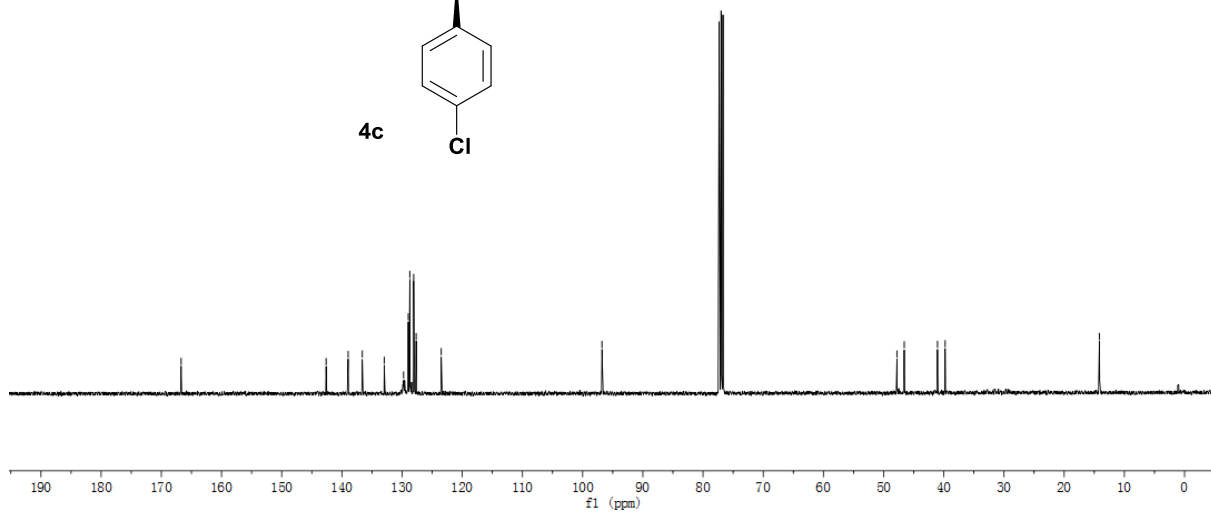

### Peak Analysis Report

| No. | Peak Name | Ret.Time (detected)<br>min | Area<br>mAU*min | Rel.Area<br>% | Height<br>mAU | Amount |
|-----|-----------|----------------------------|-----------------|---------------|---------------|--------|
| 1   | n.a.      | 6.36                       | 15.786          | 50.45         | 63.212        | n.a.   |
| 2   | n.a.      | 10.91                      | 15.505          | 49.55         | 29.892        | n.a.   |

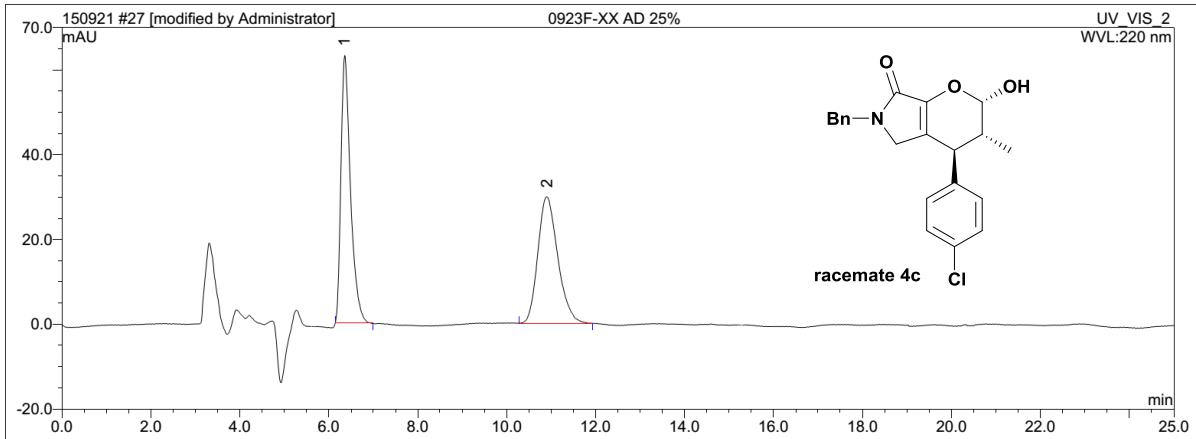

### Peak Analysis Report

| No. | Peak Name | Ret.Time (detected)<br>min | Area<br>mAU*min | Rel.Area<br>% | Height<br>mAU | Amount |
|-----|-----------|----------------------------|-----------------|---------------|---------------|--------|
| 1   | n.a.      | 6.36                       | 69.336          | 99.67         | 274.857       | n.a.   |
| 2   | n.a.      | 10.88                      | 0.232           | 0.33          | 0.770         | n.a.   |

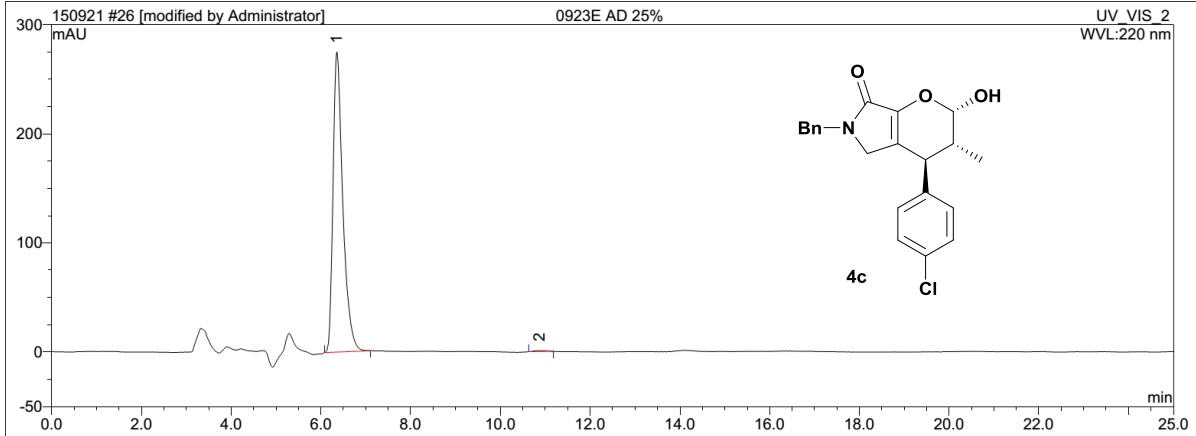

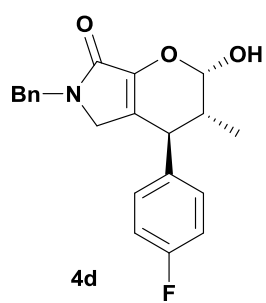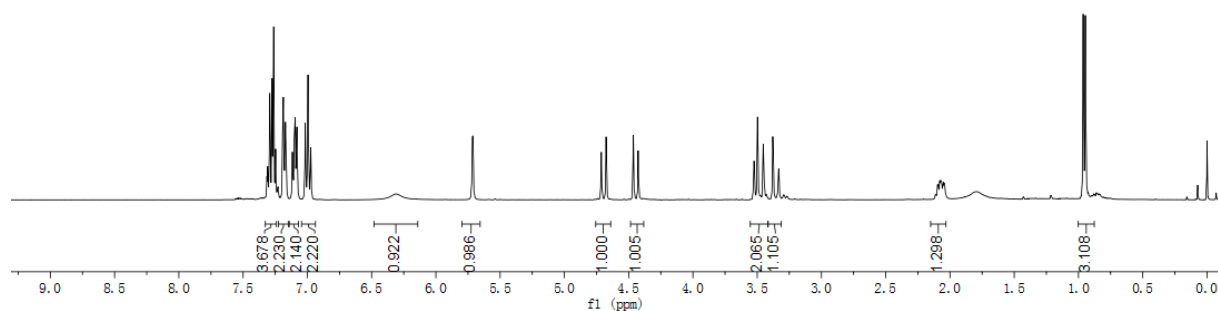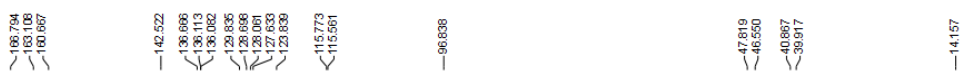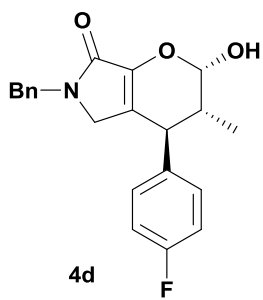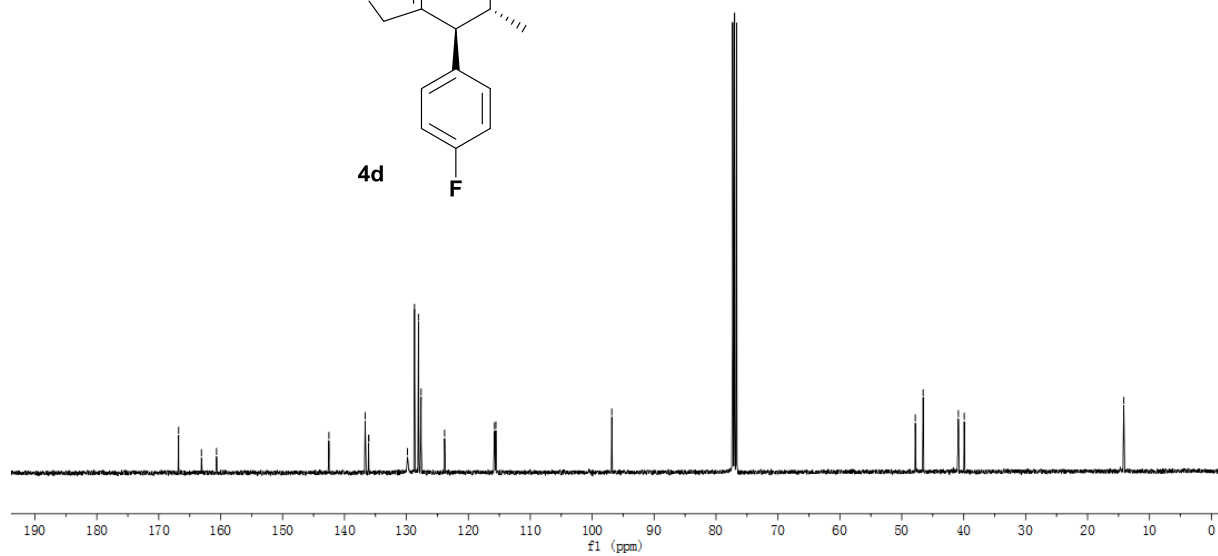

### Peak Analysis Report

| No. | Peak Name | Ret.Time (detected)<br>min | Area<br>mAU*min | Rel.Area<br>% | Height<br>mAU | Amount |
|-----|-----------|----------------------------|-----------------|---------------|---------------|--------|
| 1   | n.a.      | 6.46                       | 17.471          | 49.99         | 70.358        | n.a.   |
| 2   | n.a.      | 11.45                      | 17.480          | 50.01         | 32.897        | n.a.   |

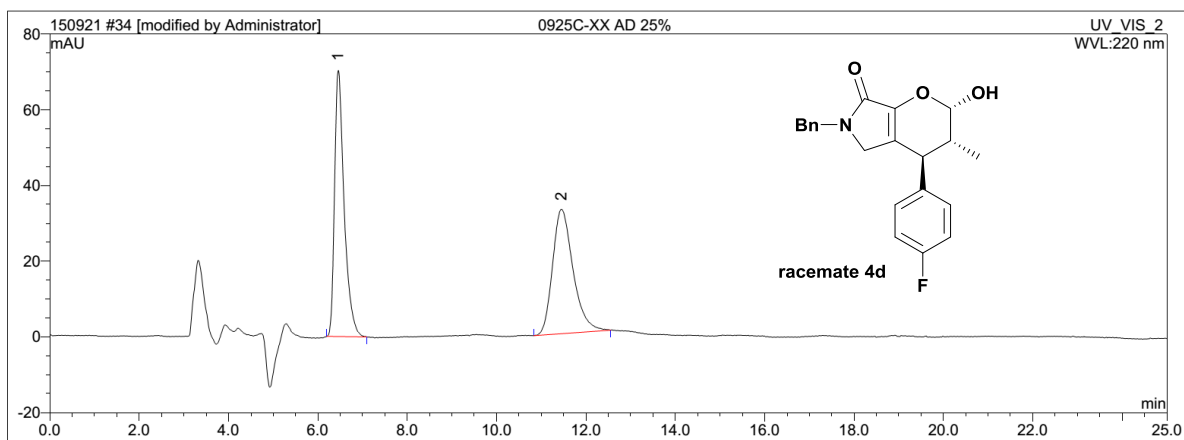

### Peak Analysis Report

| No. | Peak Name | Ret.Time (detected)<br>min | Area<br>mAU*min | Rel.Area<br>% | Height<br>mAU | Amount |
|-----|-----------|----------------------------|-----------------|---------------|---------------|--------|
| 1   | n.a.      | 6.45                       | 16.940          | 98.90         | 68.463        | n.a.   |
| 2   | n.a.      | 11.48                      | 0.188           | 1.10          | 0.383         | n.a.   |

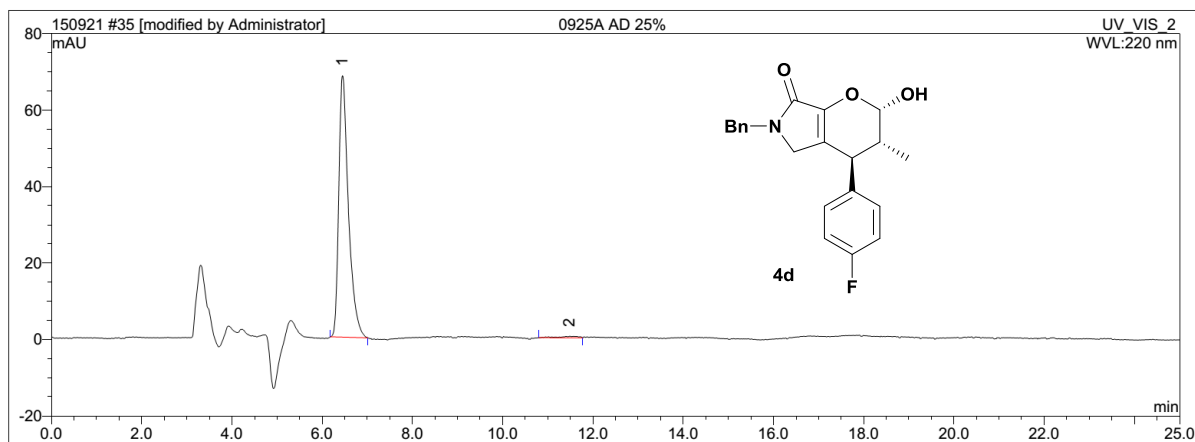

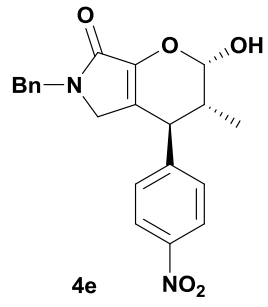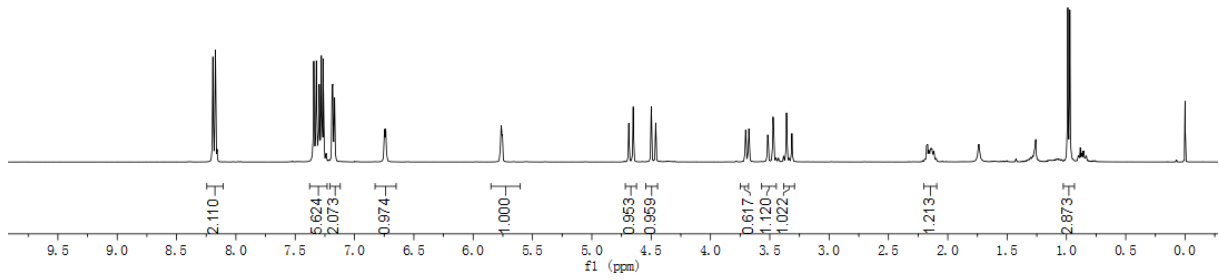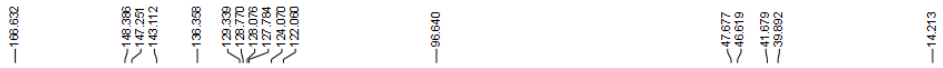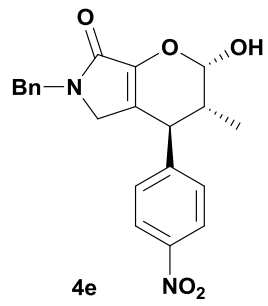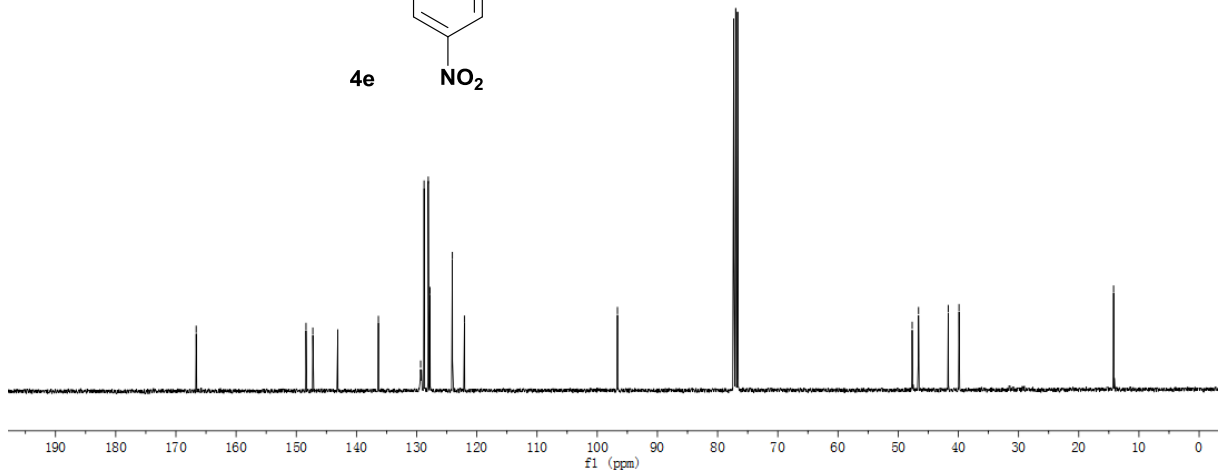



### Peak Analysis Report

| No. | Peak Name | Ret.Time (detected)<br>min | Area<br>mAU*min | Rel.Area<br>% | Height<br>mAU | Amount |
|-----|-----------|----------------------------|-----------------|---------------|---------------|--------|
| 1   | n.a.      | 9.69                       | 35.438          | 49.98         | 91.951        | n.a.   |
| 2   | n.a.      | 15.75                      | 35.465          | 50.02         | 48.646        | n.a.   |

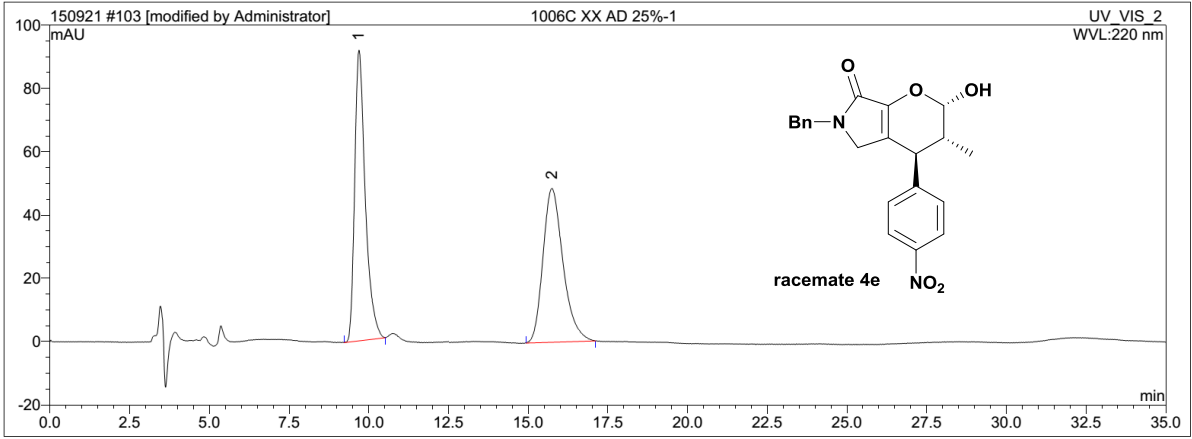

### Peak Analysis Report

| No. | Peak Name | Ret.Time (detected)<br>min | Area<br>mAU*min | Rel.Area<br>% | Height<br>mAU | Amount |
|-----|-----------|----------------------------|-----------------|---------------|---------------|--------|
| 1   | n.a.      | 9.68                       | 215.089         | 99.28         | 545.906       | n.a.   |
| 2   | n.a.      | 15.75                      | 1.564           | 0.72          | 2.354         | n.a.   |

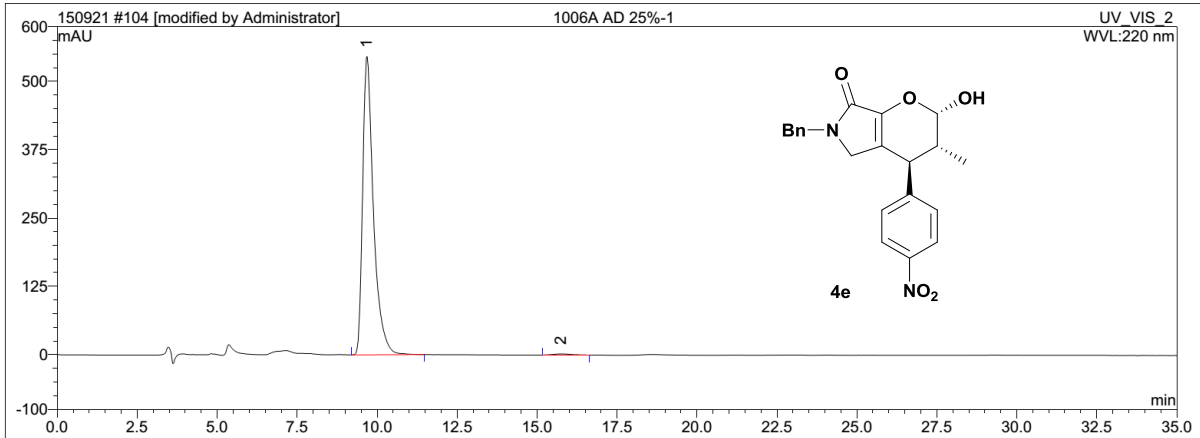

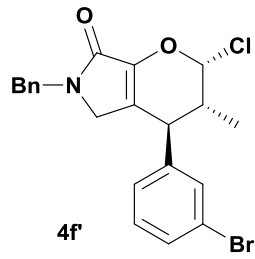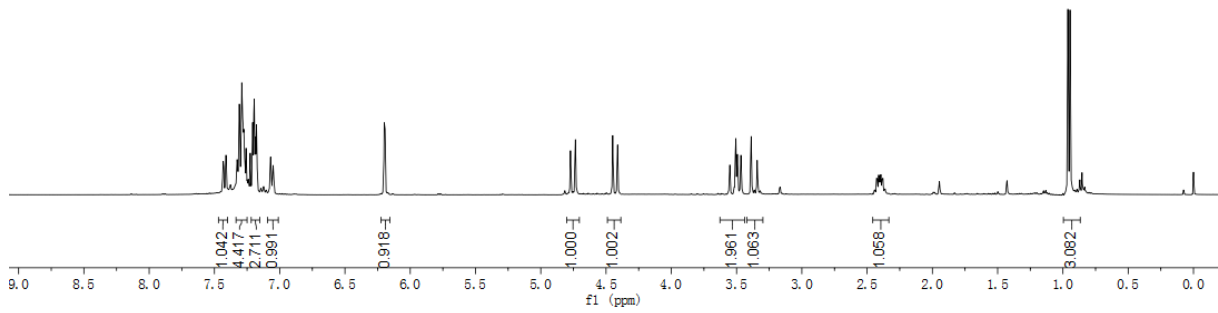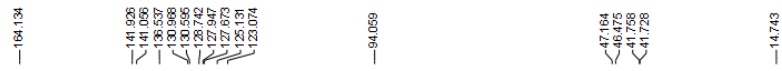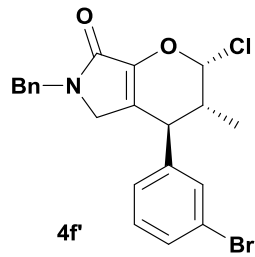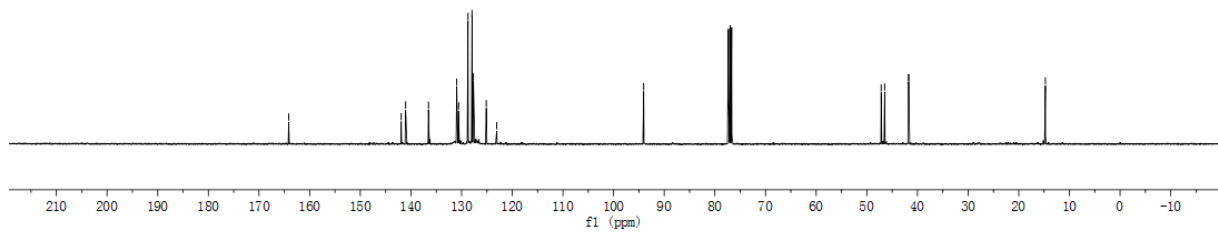

### Peak Analysis Report

| No. | Peak Name | Ret.Time (detected)<br>min | Area<br>mAU*min | Rel.Area<br>% | Height<br>mAU | Amount |
|-----|-----------|----------------------------|-----------------|---------------|---------------|--------|
| 1   | n.a.      | 37.48                      | 167.913         | 50.03         | 138.463       | n.a.   |
| 2   | n.a.      | 40.53                      | 167.686         | 49.97         | 121.747       | n.a.   |

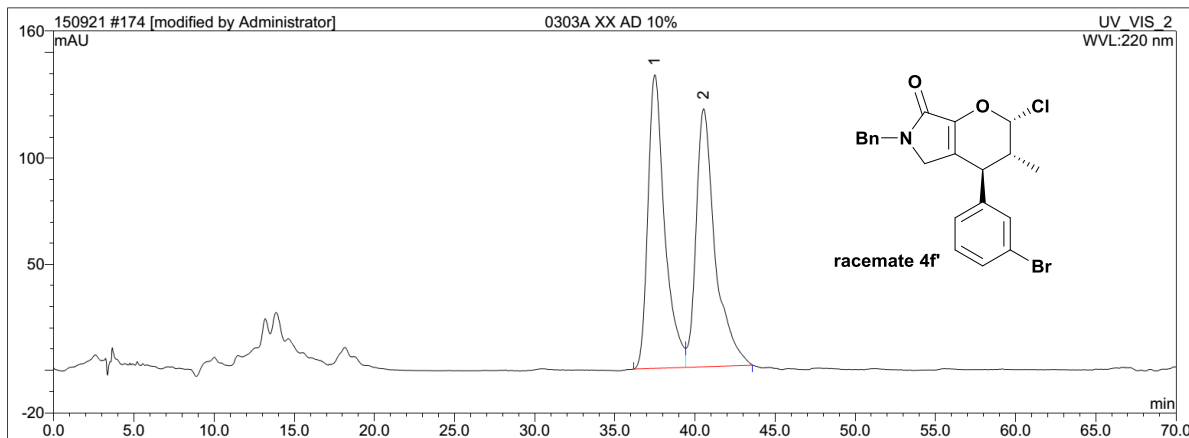

### Peak Analysis Report

| No. | Peak Name | Ret.Time (detected)<br>min | Area<br>mAU*min | Rel.Area<br>% | Height<br>mAU | Amount |
|-----|-----------|----------------------------|-----------------|---------------|---------------|--------|
| 1   | n.a.      | 36.58                      | 338.852         | 99.98         | 274.536       | n.a.   |
| 2   | n.a.      | 39.84                      | 0.082           | 0.02          | 0.032         | n.a.   |

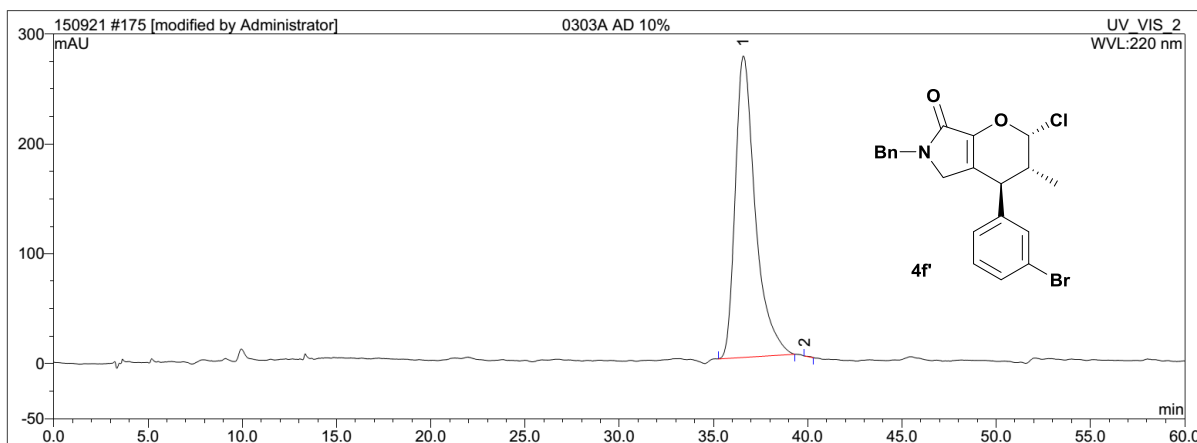

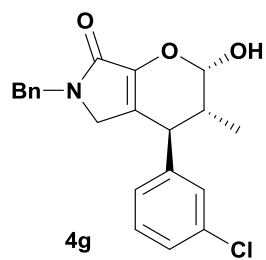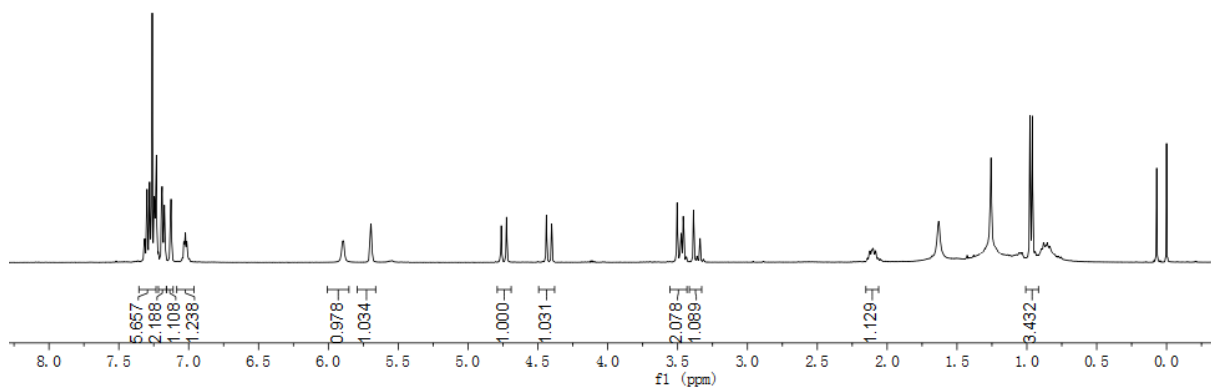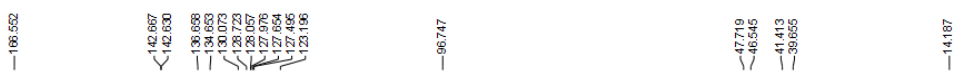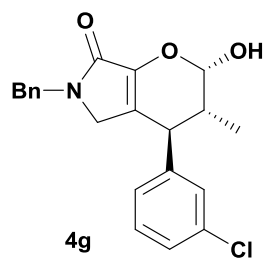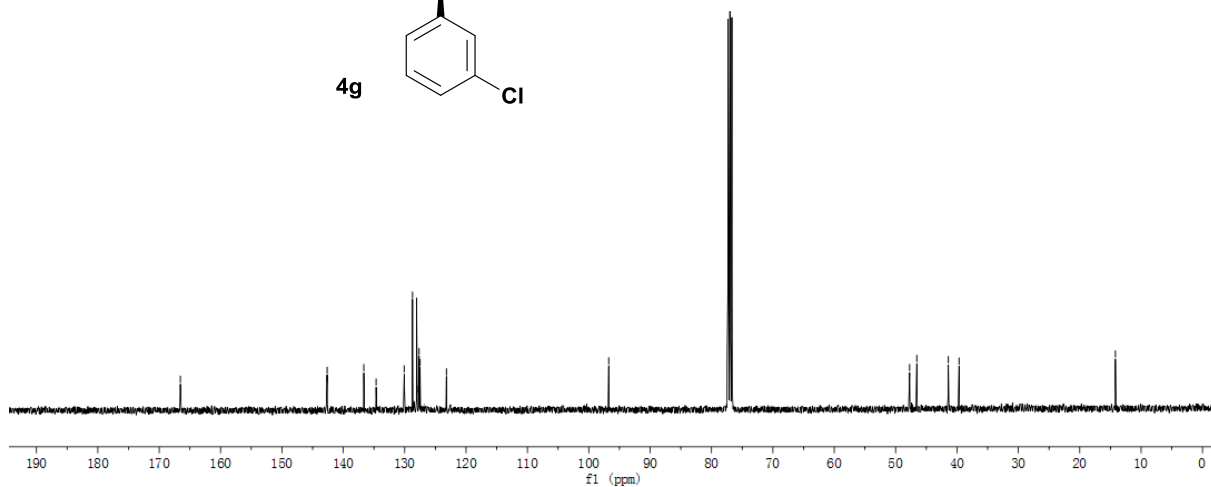

### Peak Analysis Report

| No. | Peak Name | Ret.Time (detected) | Area    | Rel.Area | Height  | Amount |
|-----|-----------|---------------------|---------|----------|---------|--------|
|     |           | min                 | mAU*min | %        | mAU     |        |
| 1   | n.a.      | 6.15                | 31.491  | 50.01    | 131.154 | n.a.   |
| 2   | n.a.      | 12.16               | 31.477  | 49.99    | 46.488  | n.a.   |

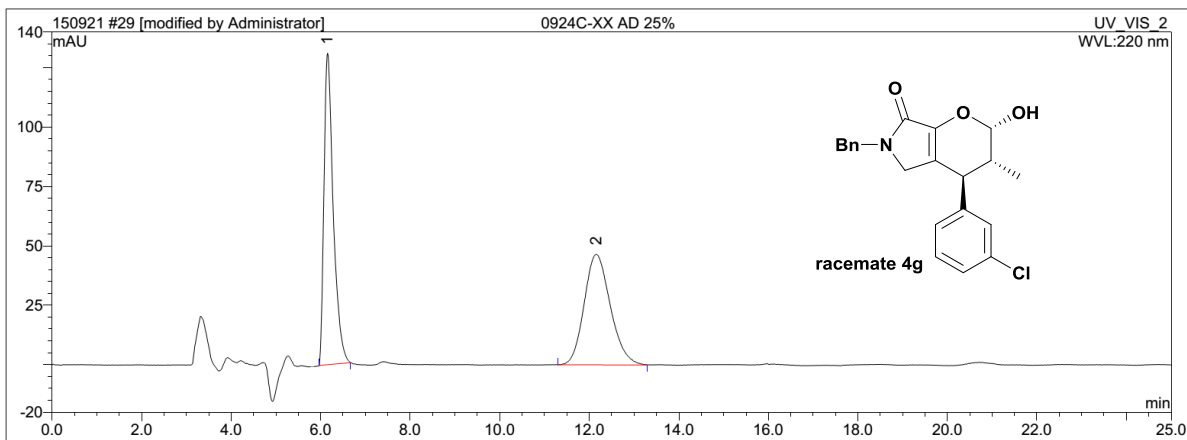

### Peak Analysis Report

| No. | Peak Name | Ret.Time (detected) | Area    | Rel.Area | Height  | Amount |
|-----|-----------|---------------------|---------|----------|---------|--------|
|     |           | min                 | mAU*min | %        | mAU     |        |
| 1   | n.a.      | 6.16                | 42.247  | 99.53    | 177.670 | n.a.   |
| 2   | n.a.      | 12.18               | 0.200   | 0.47     | 0.484   | n.a.   |

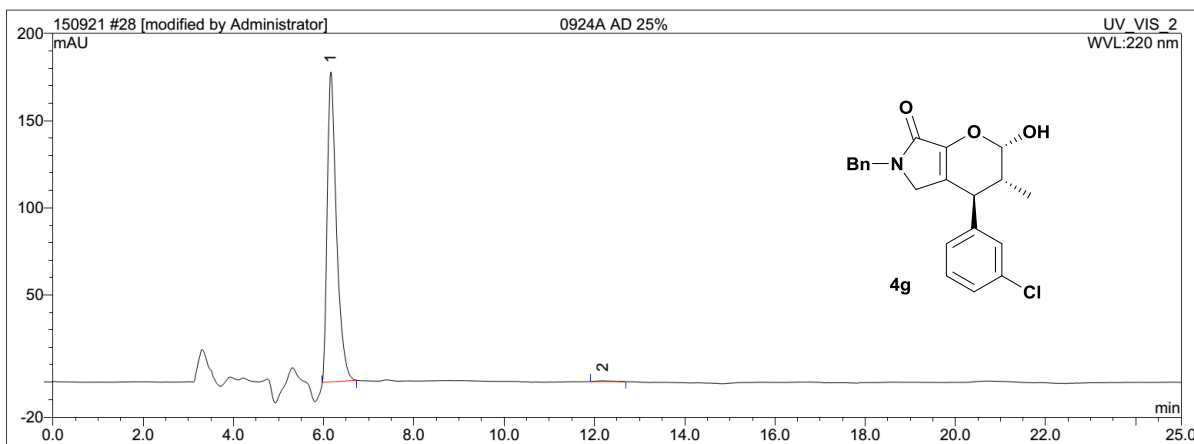

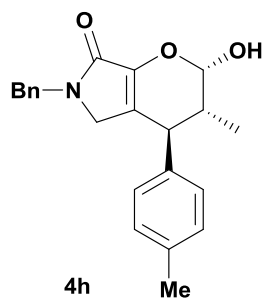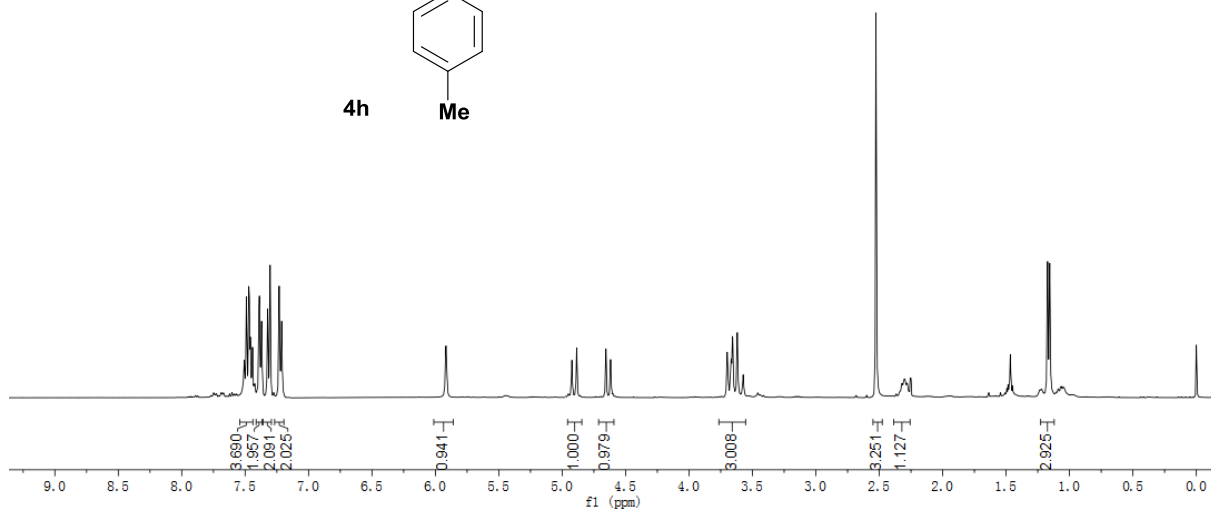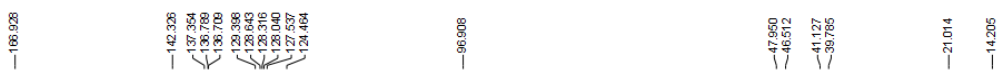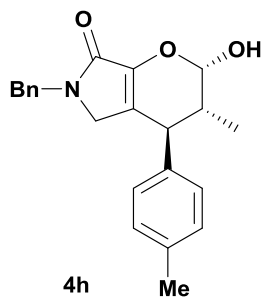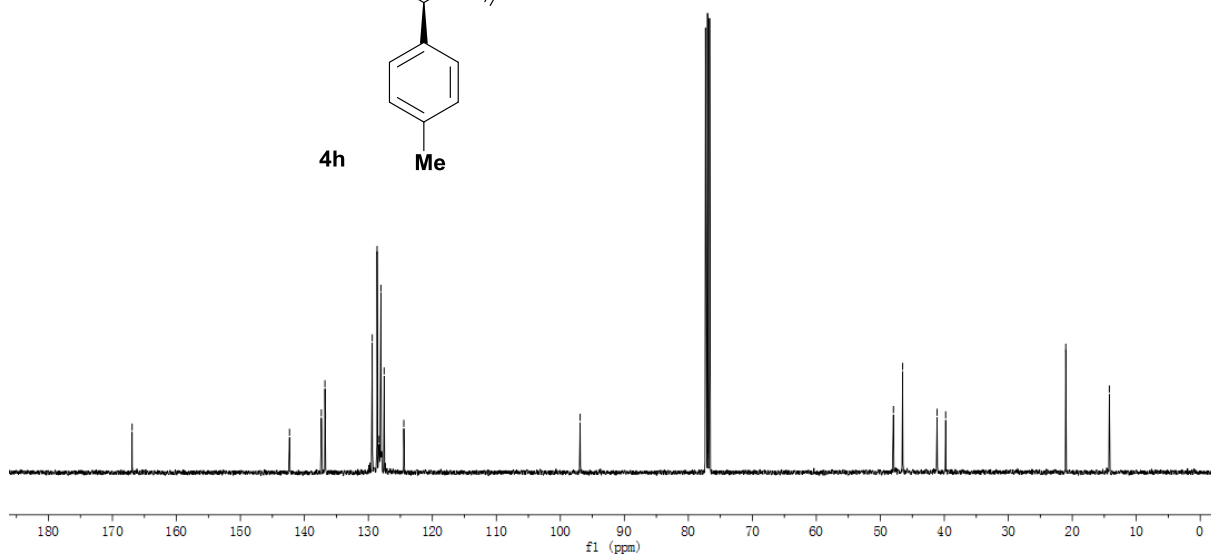

### Peak Analysis Report

| No. | Peak Name | Ret.Time (detected)<br>min | Area<br>mAU*min | Rel.Area<br>% | Height<br>mAU | Amount |
|-----|-----------|----------------------------|-----------------|---------------|---------------|--------|
| 1   | n.a.      | 5.88                       | 36.231          | 49.34         | 144.585       | n.a.   |
| 2   | n.a.      | 10.08                      | 37.206          | 50.66         | 67.116        | n.a.   |

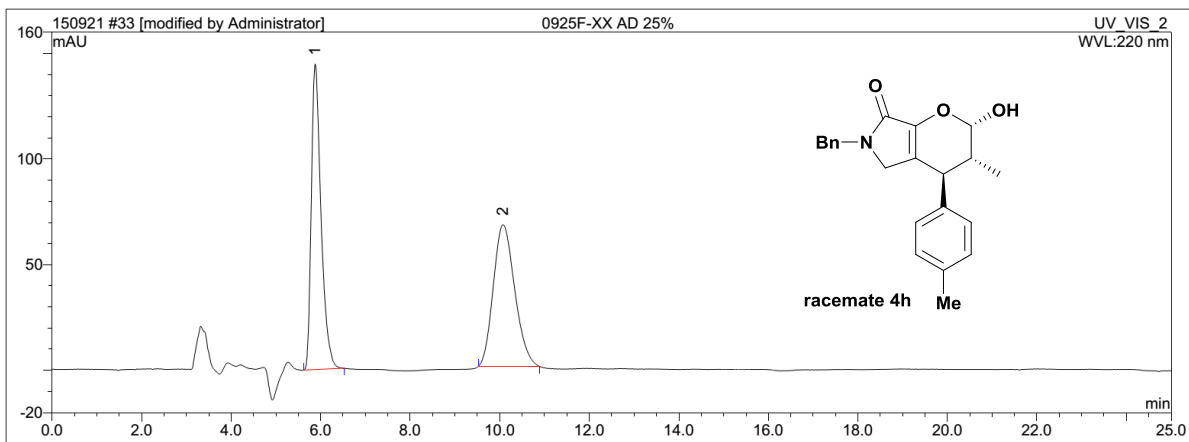

### Peak Analysis Report

| No. | Peak Name | Ret.Time (detected)<br>min | Area<br>mAU*min | Rel.Area<br>% | Height<br>mAU | Amount |
|-----|-----------|----------------------------|-----------------|---------------|---------------|--------|
| 1   | n.a.      | 5.87                       | 64.007          | 99.91         | 256.039       | n.a.   |
| 2   | n.a.      | 9.94                       | 0.057           | 0.09          | 0.315         | n.a.   |

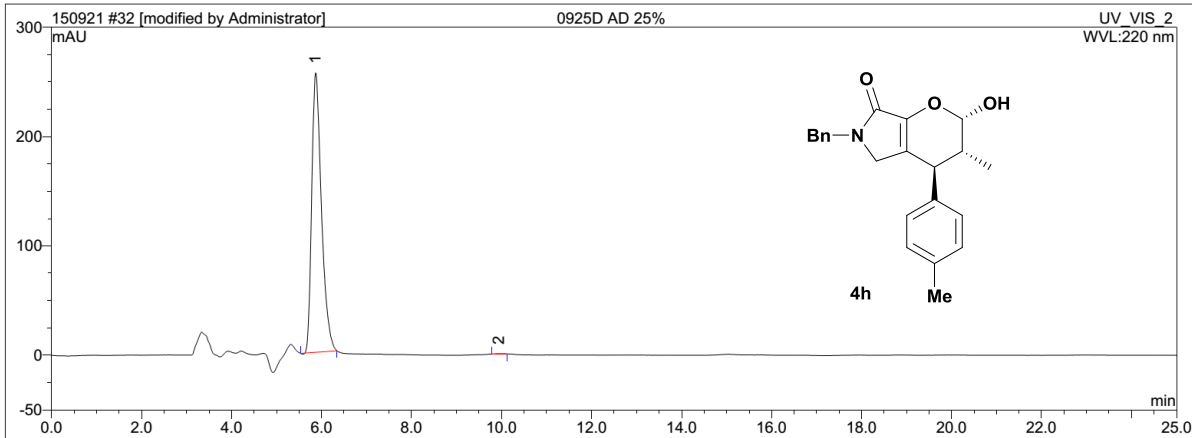

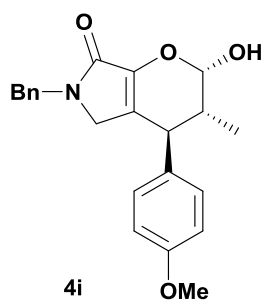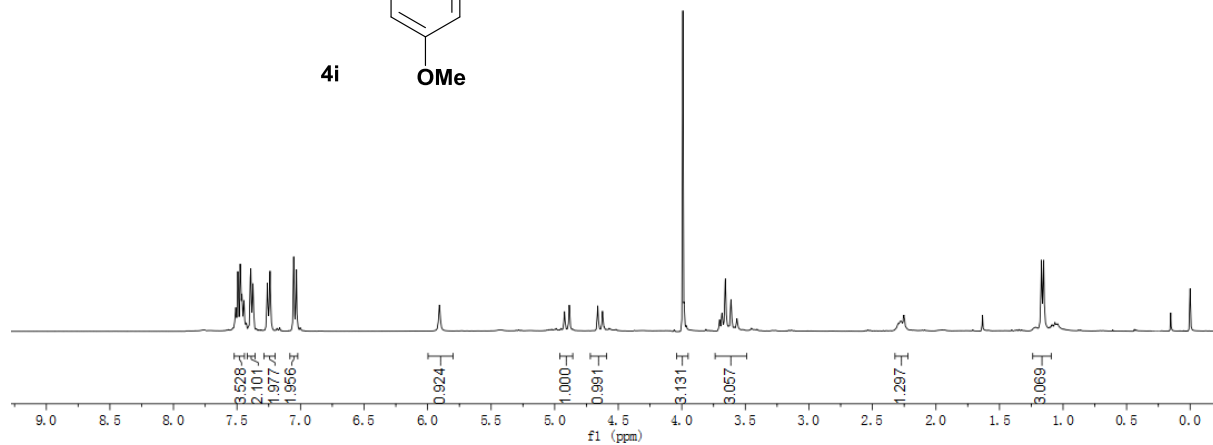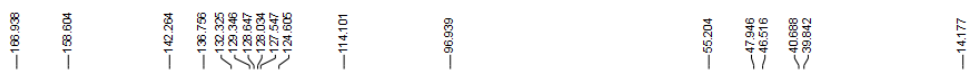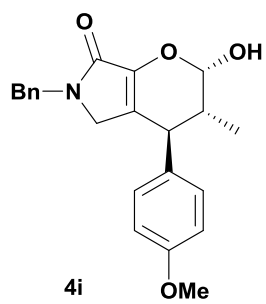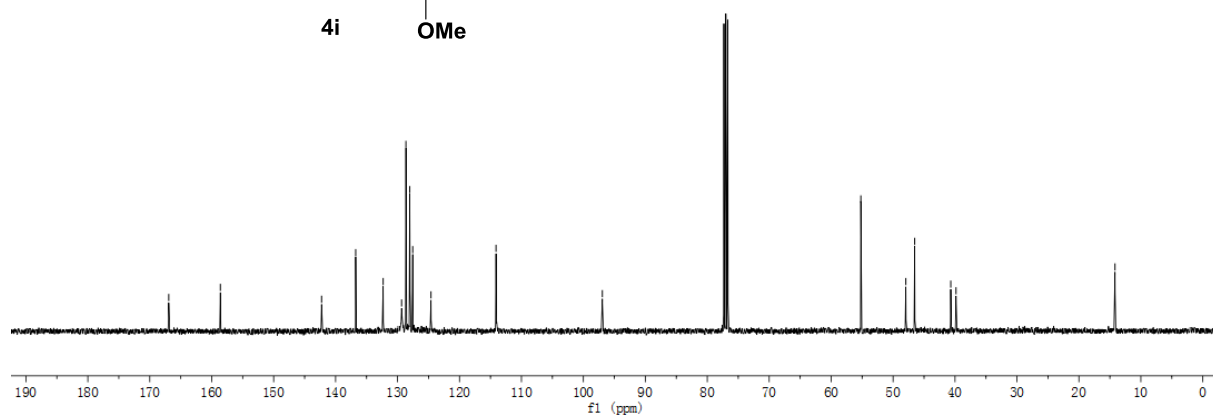



### Peak Analysis Report

| No. | Peak Name | Ret.Time (detected)<br>min | Area<br>mAU*min | Rel.Area<br>% | Height<br>mAU | Amount |
|-----|-----------|----------------------------|-----------------|---------------|---------------|--------|
| 1   | n.a.      | 7.15                       | 43.177          | 50.46         | 151.860       | n.a.   |
| 2   | n.a.      | 15.03                      | 42.395          | 49.54         | 47.389        | n.a.   |

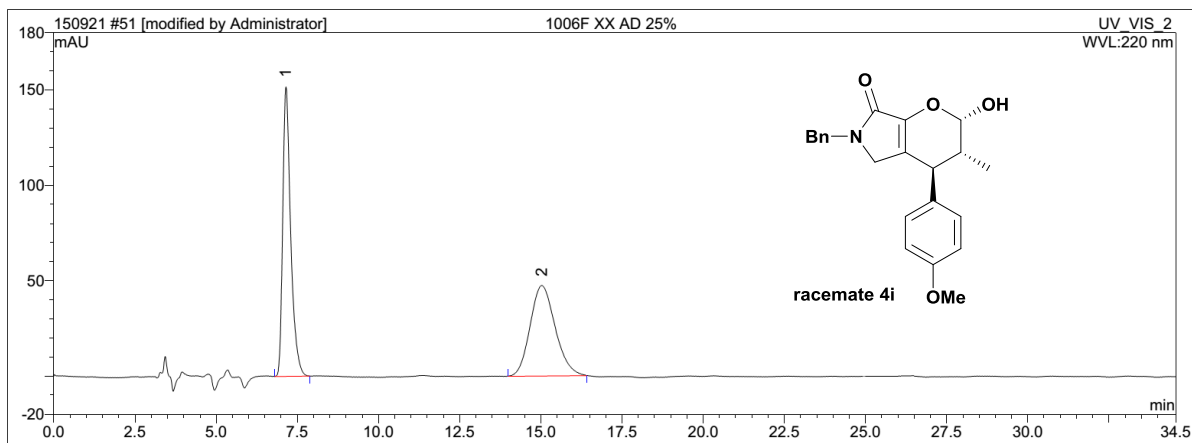

### Peak Analysis Report

| No. | Peak Name | Ret.Time (detected)<br>min | Area<br>mAU*min | Rel.Area<br>% | Height<br>mAU | Amount |
|-----|-----------|----------------------------|-----------------|---------------|---------------|--------|
| 1   | n.a.      | 7.14                       | 55.097          | 99.86         | 195.301       | n.a.   |
| 2   | n.a.      | 14.98                      | 0.078           | 0.14          | 0.214         | n.a.   |

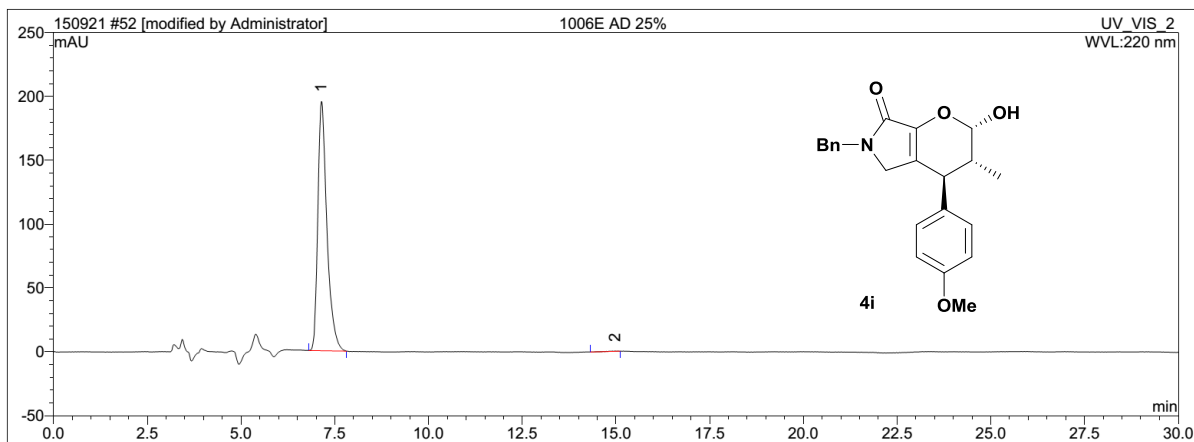

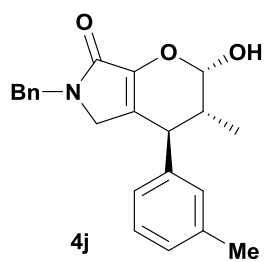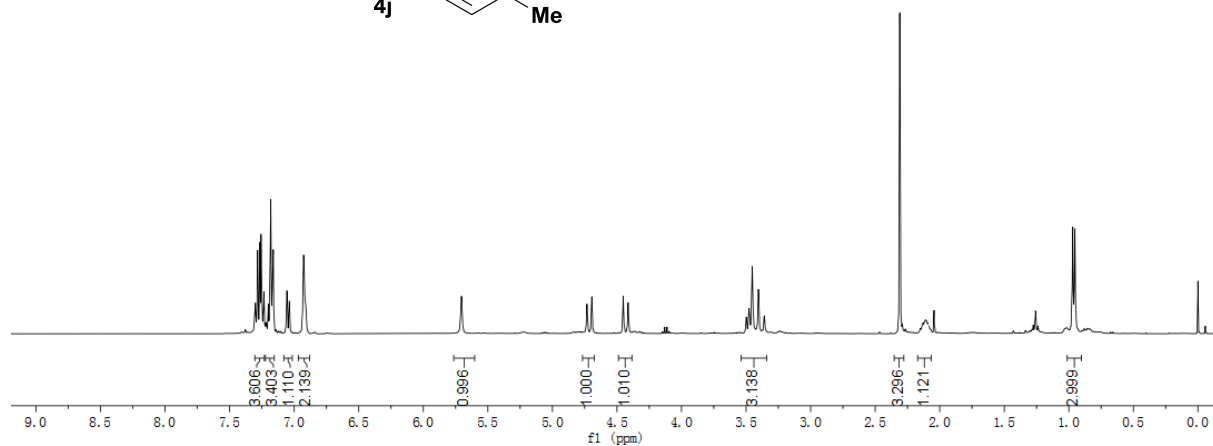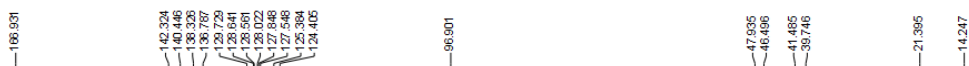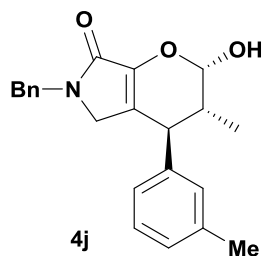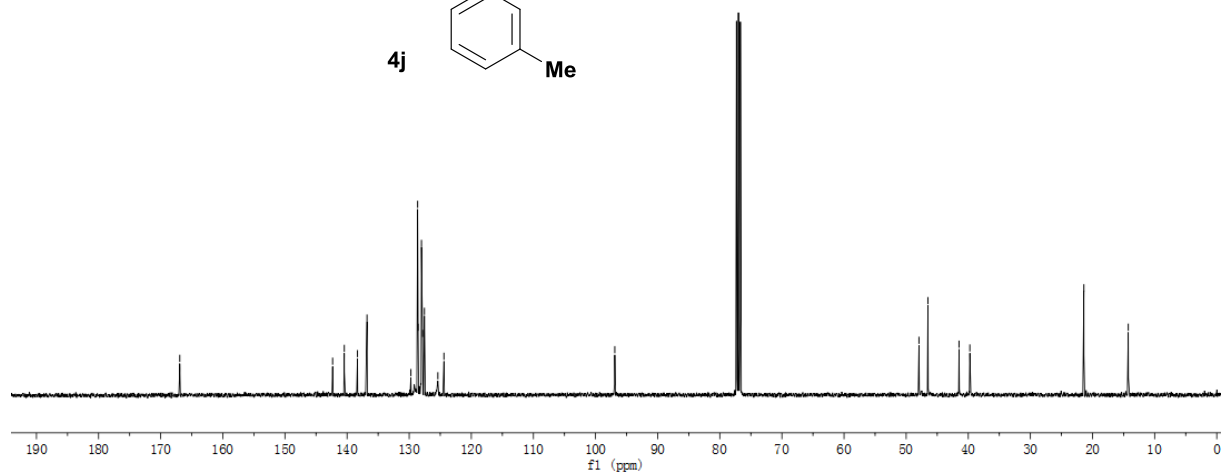

### Peak Analysis Report

| No. | Peak Name | Ret.Time (detected)<br>min | Area<br>mAU*min | Rel.Area<br>% | Height<br>mAU | Amount |
|-----|-----------|----------------------------|-----------------|---------------|---------------|--------|
| 1   | n.a.      | 5.52                       | 26.015          | 49.75         | 123.359       | n.a.   |
| 2   | n.a.      | 9.60                       | 26.272          | 50.25         | 47.637        | n.a.   |

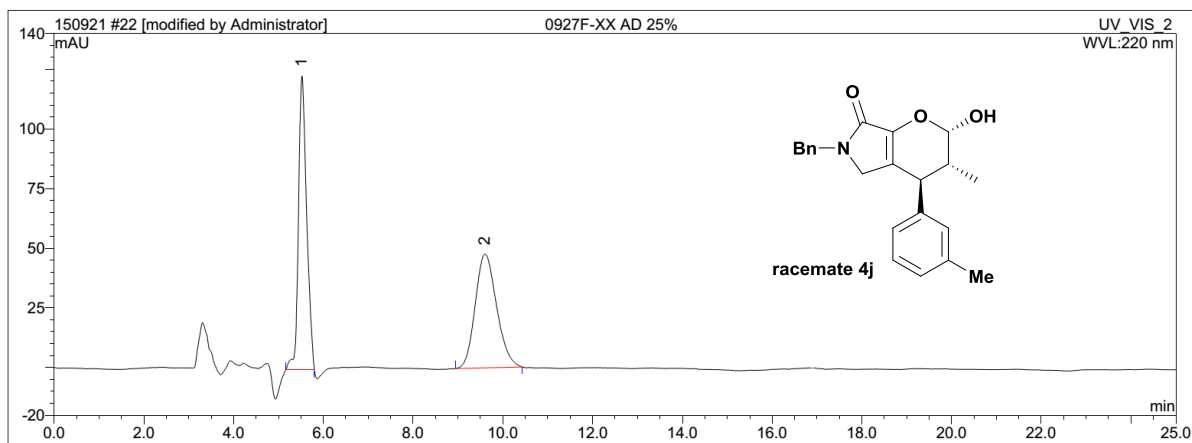

### Peak Analysis Report

| No. | Peak Name | Ret.Time (detected)<br>min | Area<br>mAU*min | Rel.Area<br>% | Height<br>mAU | Amount |
|-----|-----------|----------------------------|-----------------|---------------|---------------|--------|
| 1   | n.a.      | 5.52                       | 23.436          | 99.95         | 106.157       | n.a.   |
| 2   | n.a.      | 9.56                       | 0.011           | 0.05          | 0.024         | n.a.   |

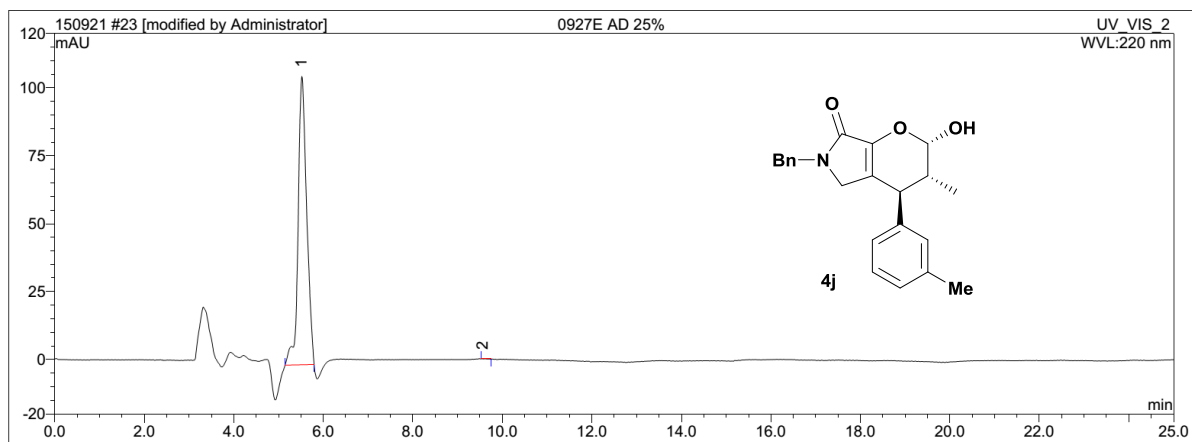

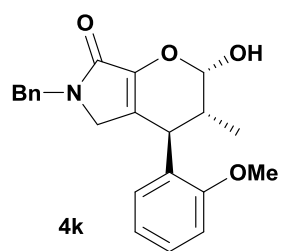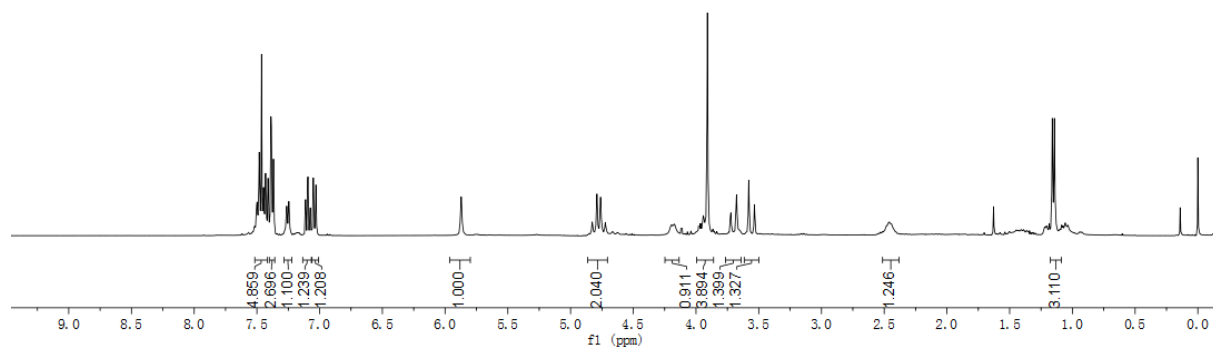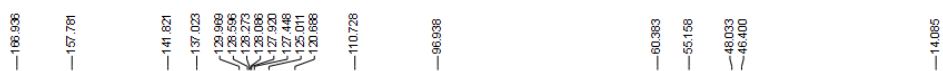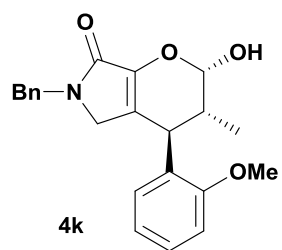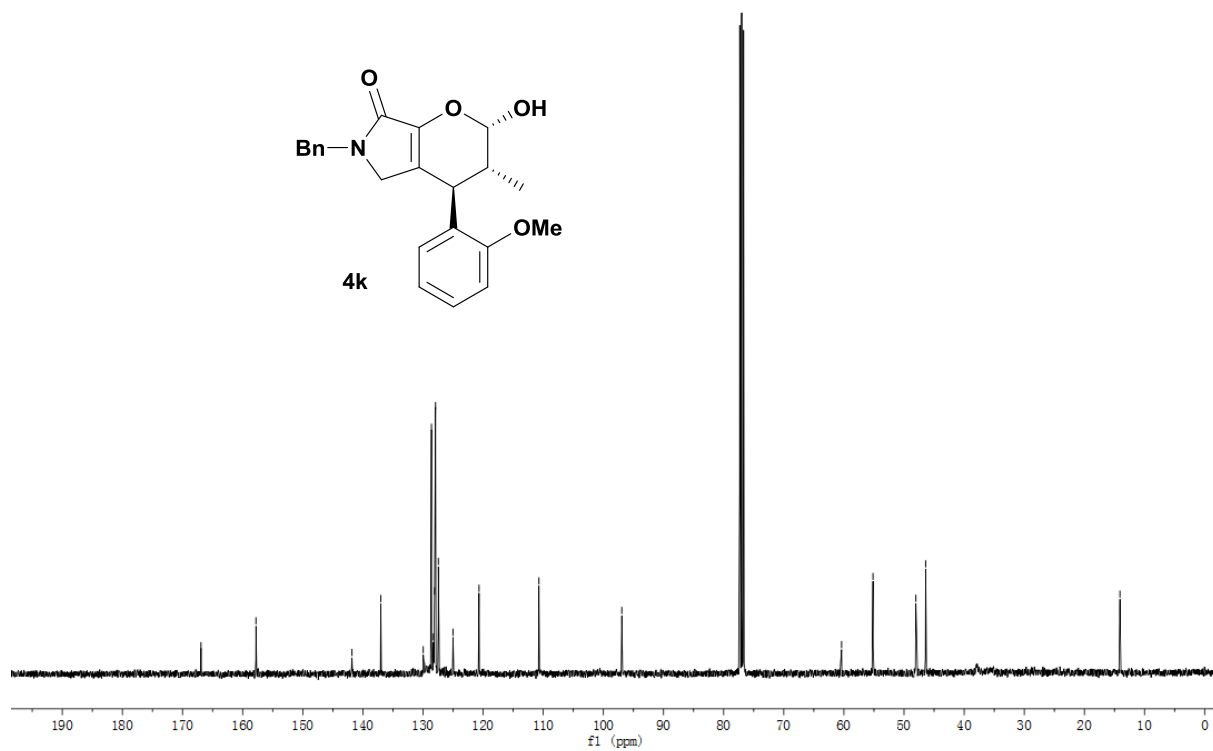

### Peak Analysis Report

| No. | Peak Name | Ret.Time (detected) | Area    | Rel.Area | Height | Amount |
|-----|-----------|---------------------|---------|----------|--------|--------|
|     |           | min                 | mAU*min | %        | mAU    |        |
| 1   | n.a.      | 8.01                | 29.332  | 49.45    | 89.465 | n.a.   |
| 2   | n.a.      | 17.93               | 29.986  | 50.55    | 39.869 | n.a.   |

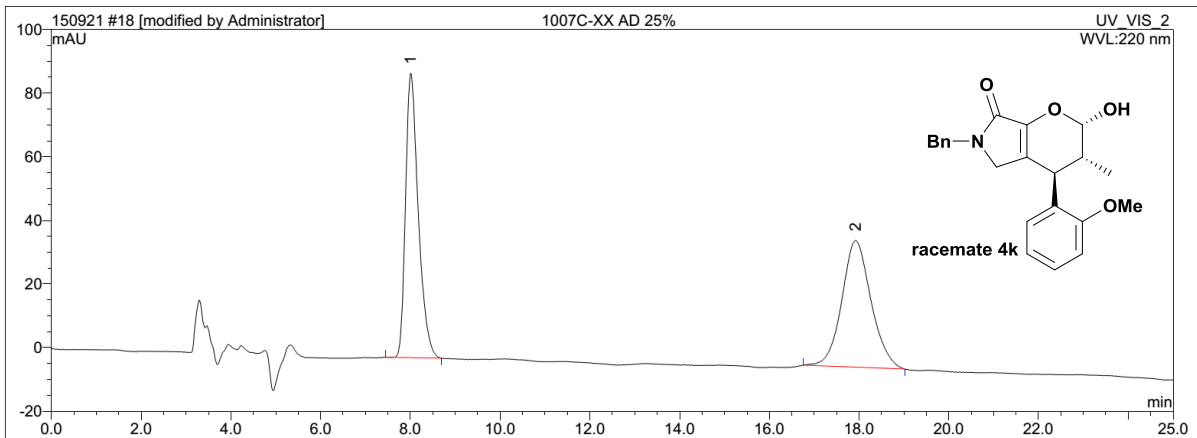

### Peak Analysis Report

| No. | Peak Name | Ret.Time (detected) | Area    | Rel.Area | Height  | Amount |
|-----|-----------|---------------------|---------|----------|---------|--------|
|     |           | min                 | mAU*min | %        | mAU     |        |
| 1   | n.a.      | 8.00                | 51.262  | 98.08    | 156.814 | n.a.   |
| 2   | n.a.      | 17.83               | 1.002   | 1.92     | 1.467   | n.a.   |

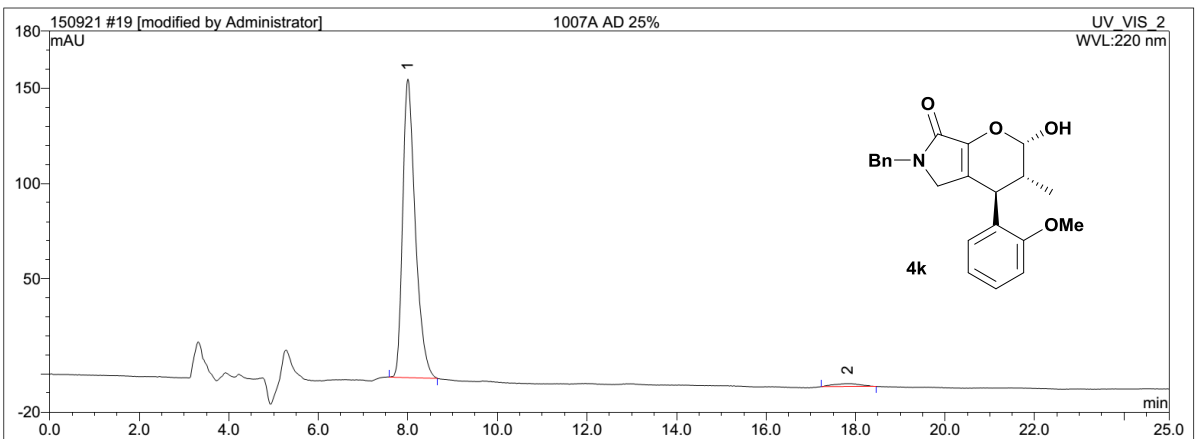

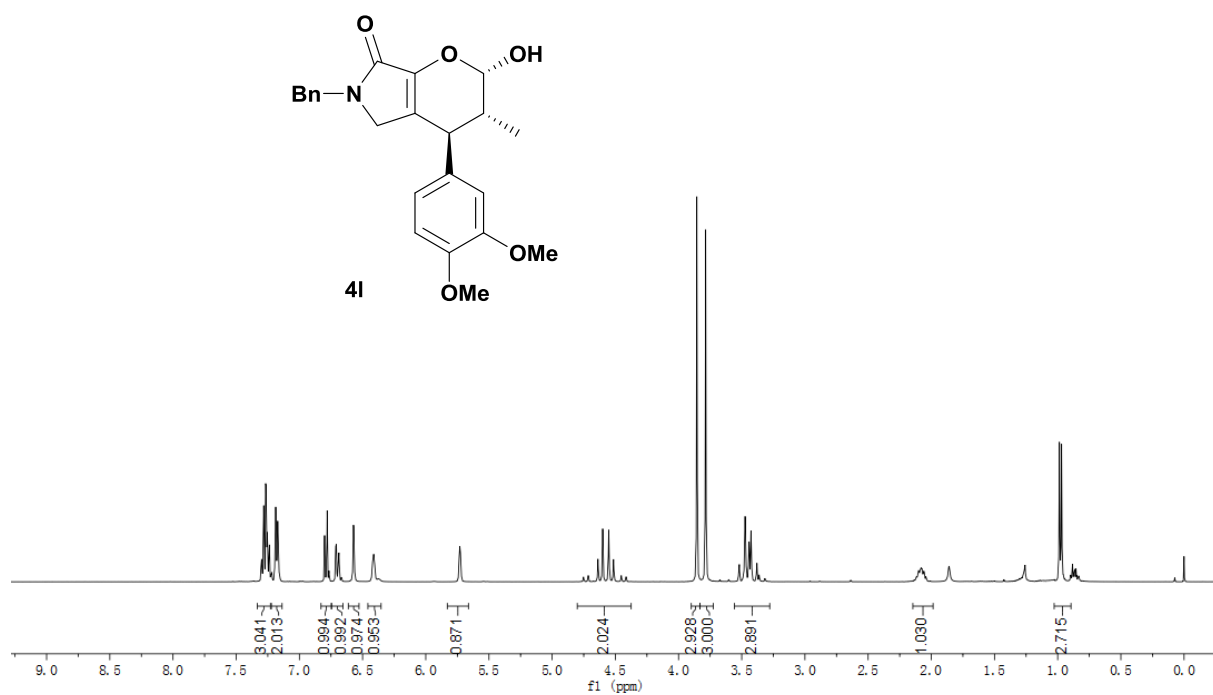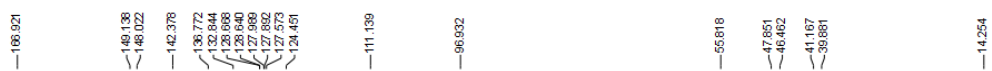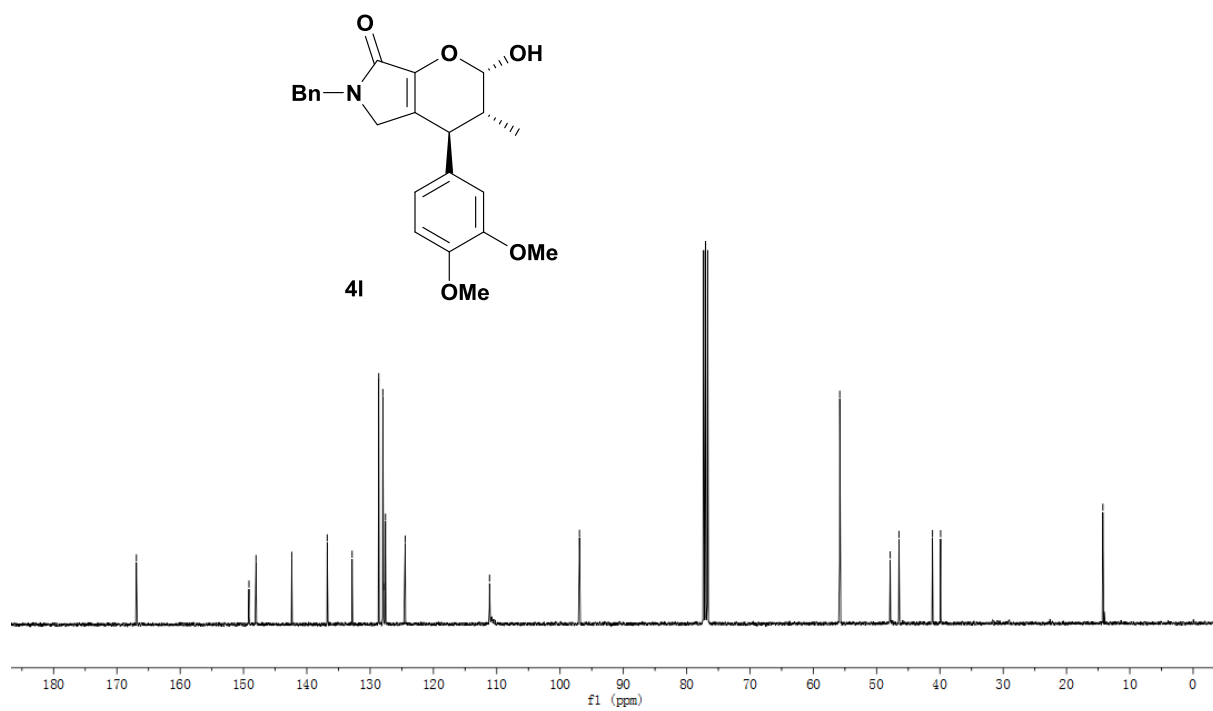

### Peak Analysis Report

| No. | Peak Name | Ret.Time (detected)<br>min | Area<br>mAU*min | Rel.Area<br>% | Height<br>mAU | Amount |
|-----|-----------|----------------------------|-----------------|---------------|---------------|--------|
| 1   | n.a.      | 7.89                       | 12.796          | 49.79         | 39.780        | n.a.   |
| 2   | n.a.      | 16.62                      | 12.905          | 50.21         | 14.569        | n.a.   |

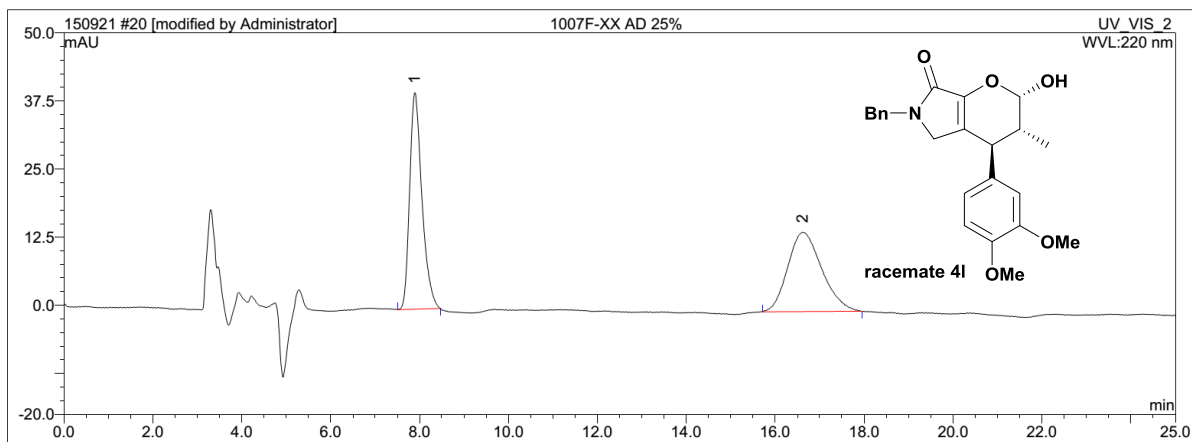

### Peak Analysis Report

| No. | Peak Name | Ret.Time (detected)<br>min | Area<br>mAU*min | Rel.Area<br>% | Height<br>mAU | Amount |
|-----|-----------|----------------------------|-----------------|---------------|---------------|--------|
| 1   | n.a.      | 7.89                       | 51.472          | 99.55         | 156.894       | n.a.   |
| 2   | n.a.      | 16.68                      | 0.232           | 0.45          | 0.411         | n.a.   |

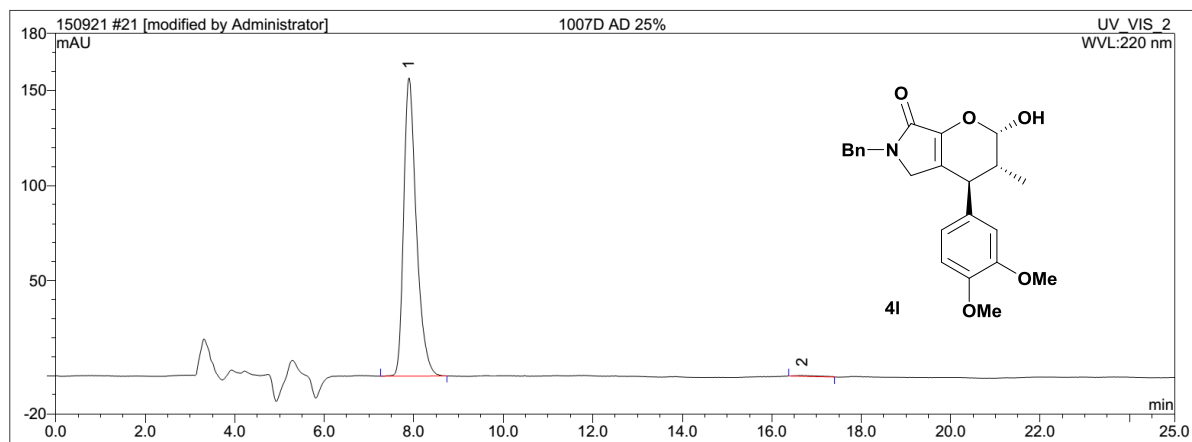

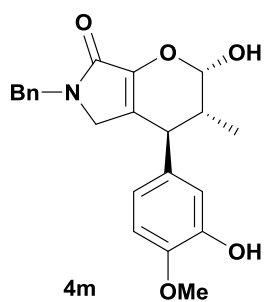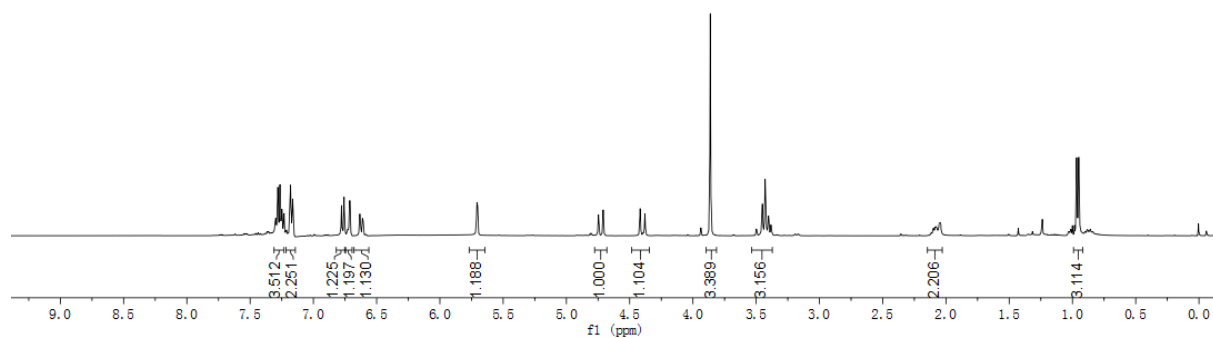

166.842  
 145.799  
 145.631  
 142.172  
 136.799  
 133.532  
 129.650  
 128.072  
 127.988  
 127.528  
 124.494  
 114.267  
 110.666  
 96.697  
 55.817  
 47.915  
 46.517  
 40.940  
 39.696  
 14.206

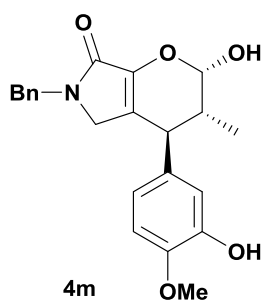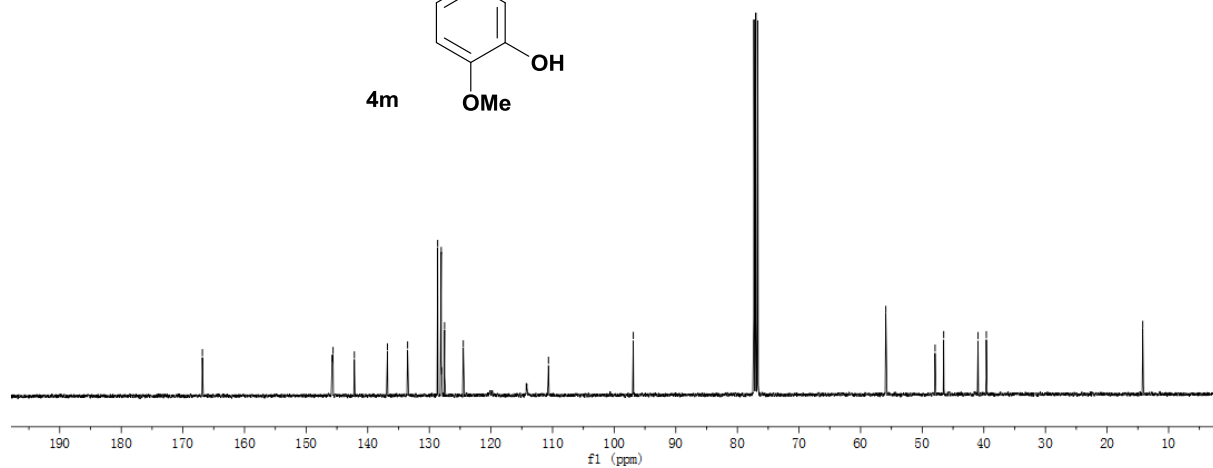



### Peak Analysis Report

| No. | Peak Name | Ret.Time (detected)<br>min | Area<br>mAU*min | Rel.Area<br>% | Height<br>mAU | Amount |
|-----|-----------|----------------------------|-----------------|---------------|---------------|--------|
| 1   | n.a.      | 10.17                      | 43.631          | 50.37         | 103.764       | n.a.   |
| 2   | n.a.      | 29.23                      | 42.997          | 49.63         | 37.062        | n.a.   |

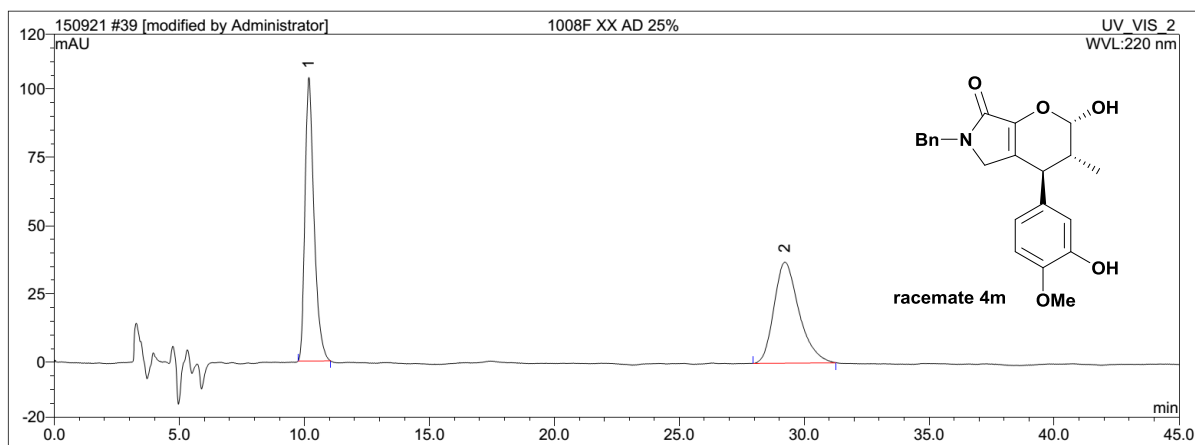

### Peak Analysis Report

| No. | Peak Name | Ret.Time (detected)<br>min | Area<br>mAU*min | Rel.Area<br>% | Height<br>mAU | Amount |
|-----|-----------|----------------------------|-----------------|---------------|---------------|--------|
| 1   | n.a.      | 10.18                      | 70.343          | 99.80         | 166.457       | n.a.   |
| 2   | n.a.      | 29.14                      | 0.140           | 0.20          | 0.400         | n.a.   |

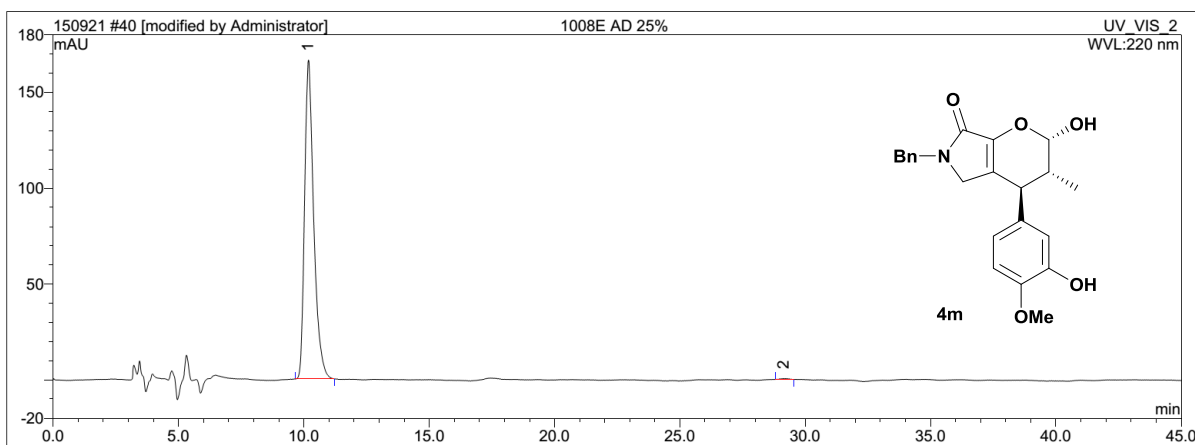

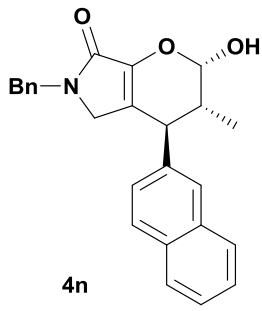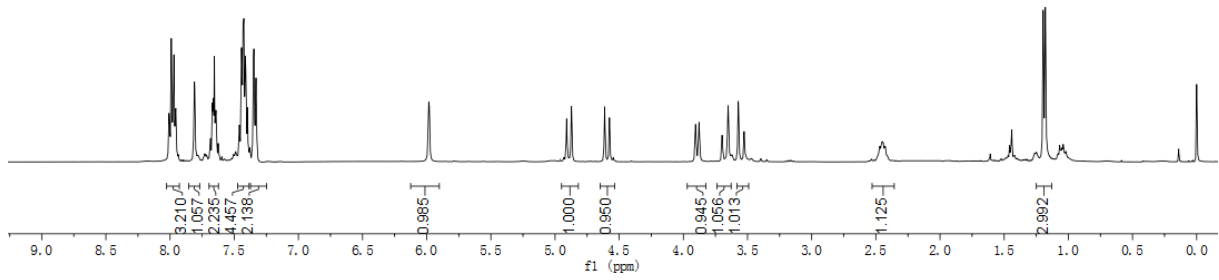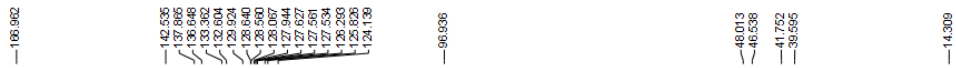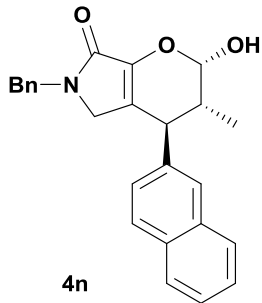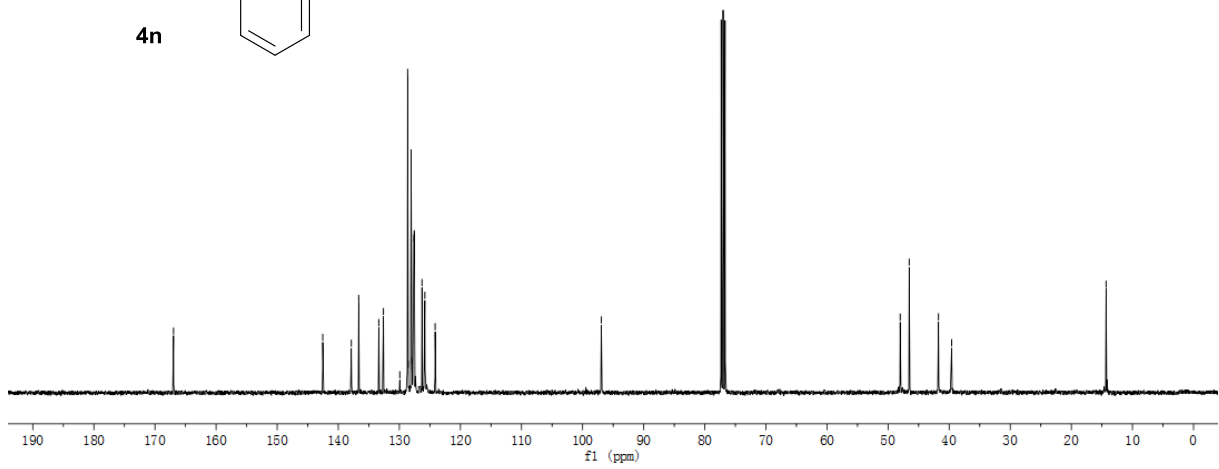

### Peak Analysis Report

| No. | Peak Name | Ret.Time (detected)<br>min | Area<br>mAU*min | Rel.Area<br>% | Height<br>mAU | Amount |
|-----|-----------|----------------------------|-----------------|---------------|---------------|--------|
| 1   | n.a.      | 6.93                       | 229.390         | 50.20         | 821.440       | n.a.   |
| 2   | n.a.      | 13.84                      | 227.523         | 49.80         | 261.424       | n.a.   |

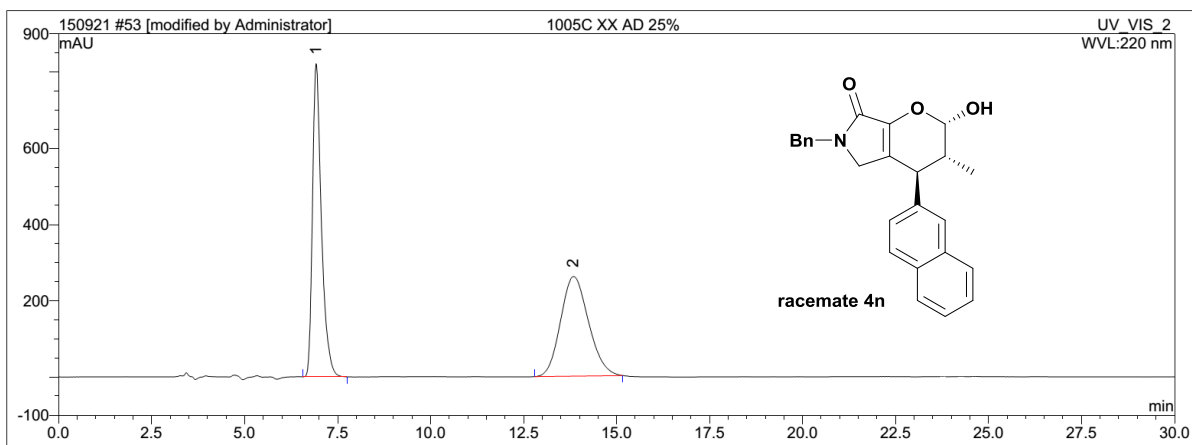

### Peak Analysis Report

| No. | Peak Name | Ret.Time (detected)<br>min | Area<br>mAU*min | Rel.Area<br>% | Height<br>mAU | Amount |
|-----|-----------|----------------------------|-----------------|---------------|---------------|--------|
| 1   | n.a.      | 6.92                       | 266.413         | 99.50         | 950.072       | n.a.   |
| 2   | n.a.      | 13.88                      | 1.328           | 0.50          | 2.175         | n.a.   |

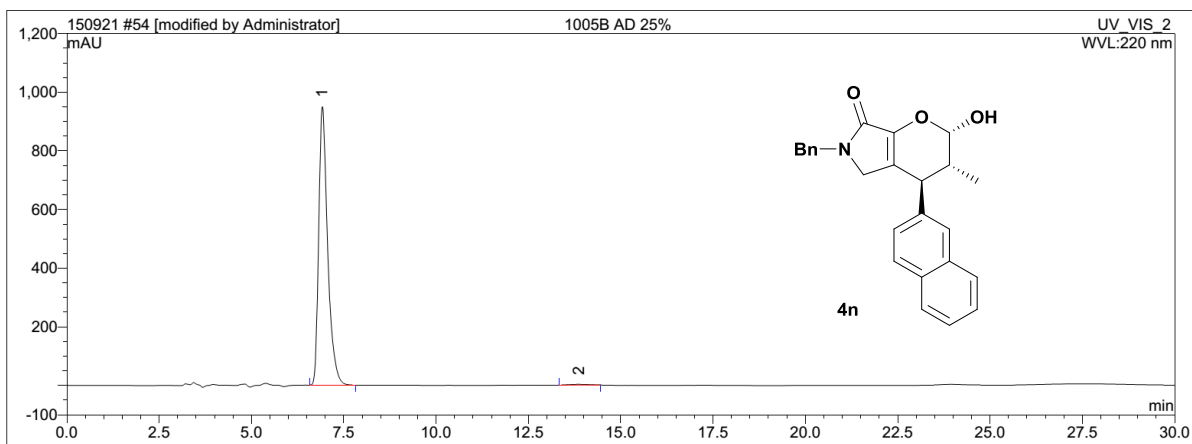

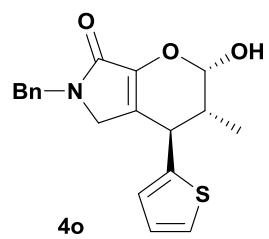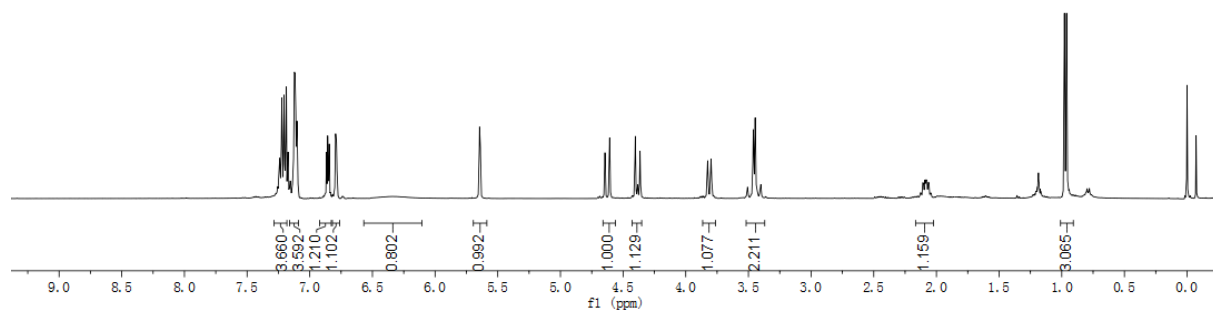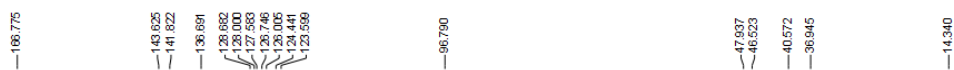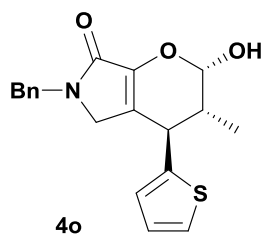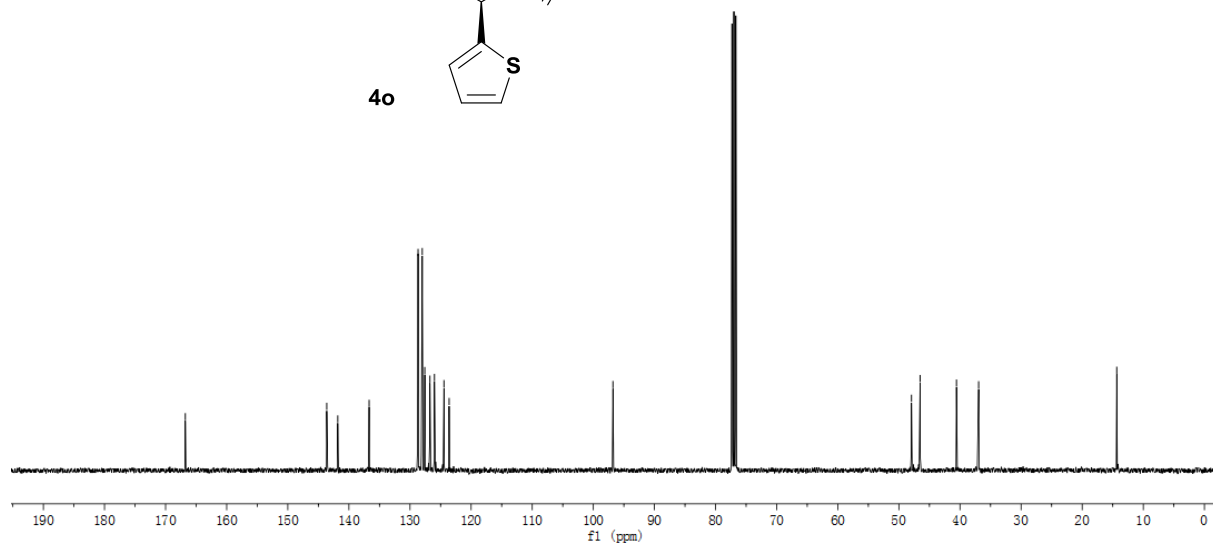

### Peak Analysis Report

| No. | Peak Name | Ret.Time (detected)<br>min | Area<br>mAU*min | Rel.Area<br>% | Height<br>mAU | Amount |
|-----|-----------|----------------------------|-----------------|---------------|---------------|--------|
| 1   | n.a.      | 9.23                       | 39.271          | 49.83         | 115.766       | n.a.   |
| 2   | n.a.      | 18.54                      | 39.532          | 50.17         | 39.788        | n.a.   |

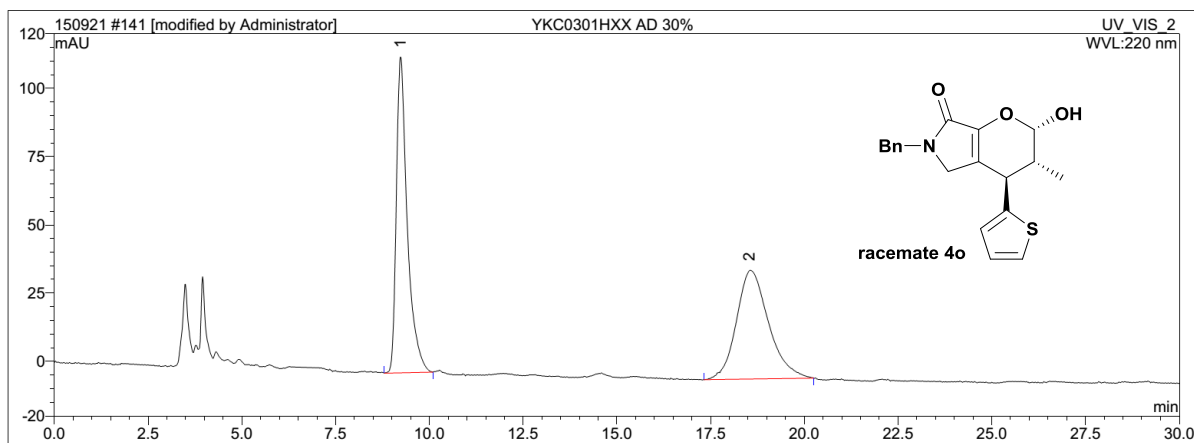

### Peak Analysis Report

| No. | Peak Name | Ret.Time (detected)<br>min | Area<br>mAU*min | Rel.Area<br>% | Height<br>mAU | Amount |
|-----|-----------|----------------------------|-----------------|---------------|---------------|--------|
| 1   | n.a.      | 9.22                       | 255.400         | 98.11         | 744.620       | n.a.   |
| 2   | n.a.      | 18.70                      | 4.922           | 1.89          | 5.471         | n.a.   |

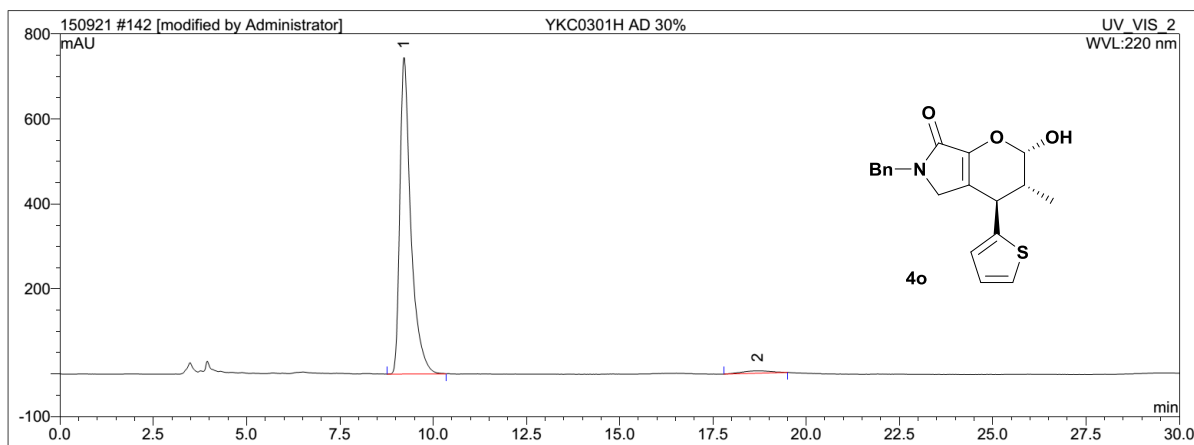

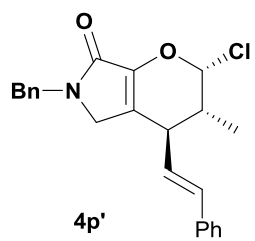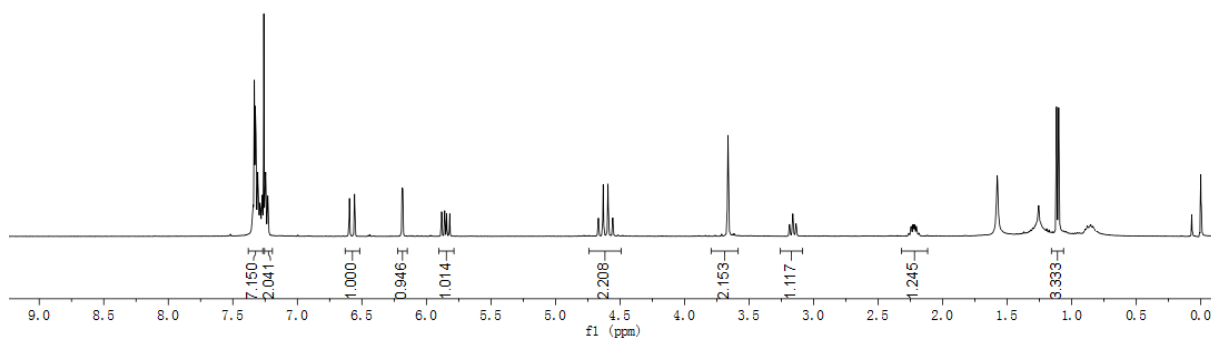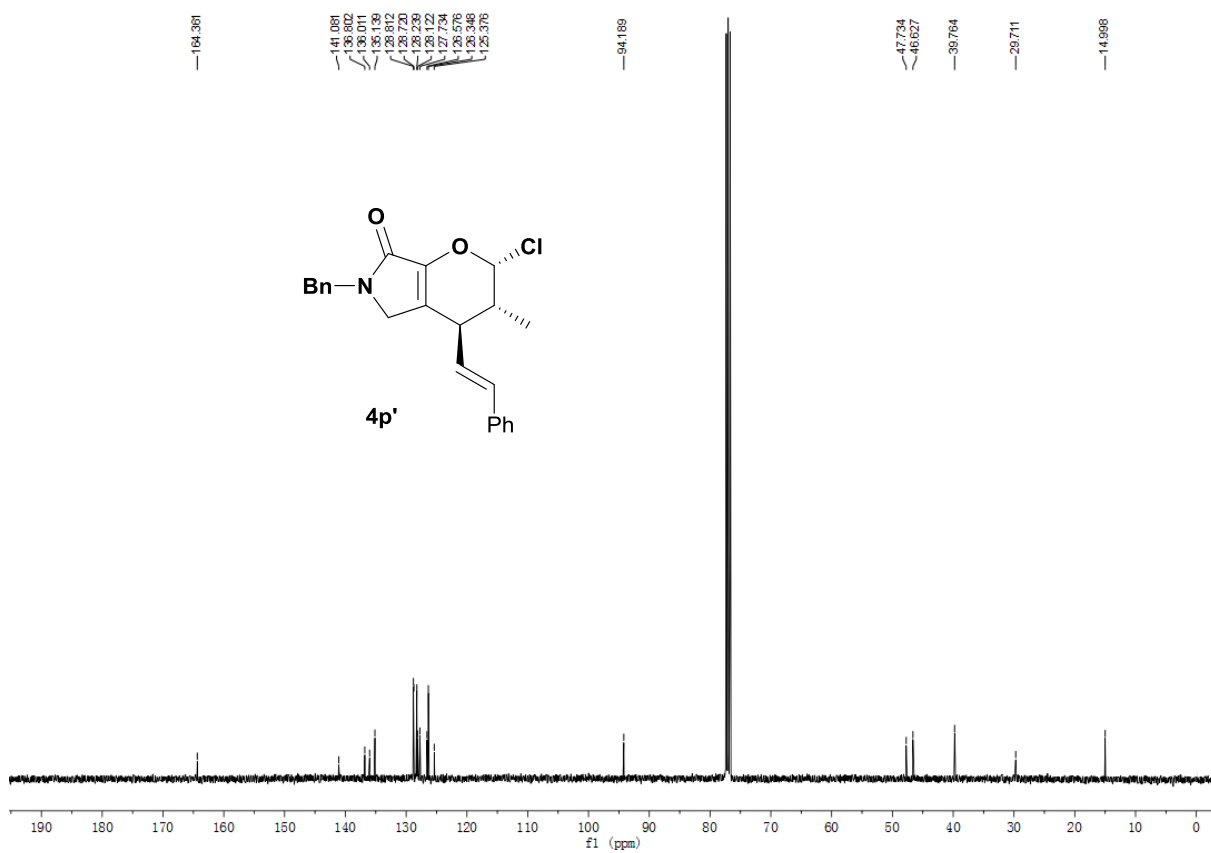

### Peak Analysis Report

| No. | Peak Name | Ret.Time (detected) | Area    | Rel.Area | Height  | Amount |
|-----|-----------|---------------------|---------|----------|---------|--------|
|     |           | min                 | mAU*min | %        | mAU     |        |
| 1   | n.a.      | 9.03                | 50.282  | 49.44    | 162.113 | n.a.   |
| 2   | n.a.      | 10.68               | 51.425  | 50.56    | 139.236 | n.a.   |

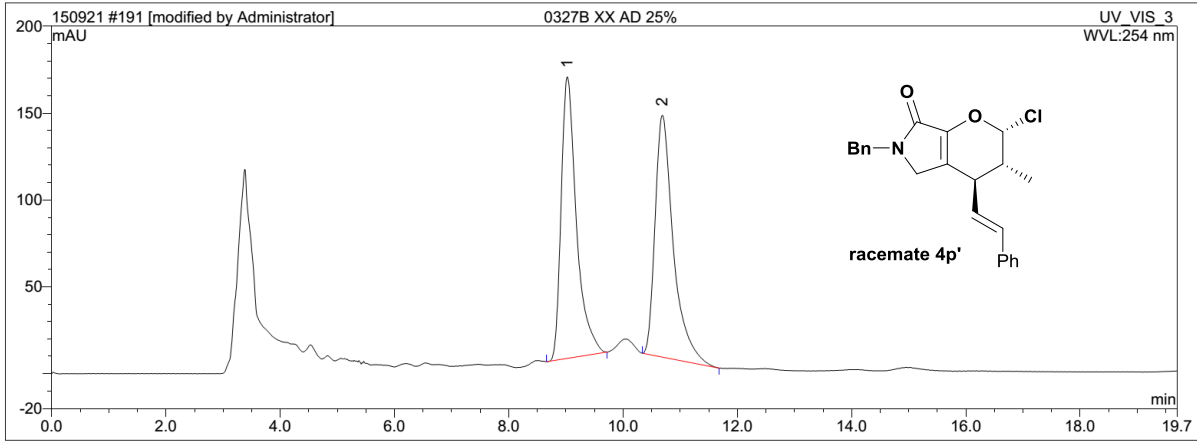

### Peak Analysis Report

| No. | Peak Name | Ret.Time (detected) | Area    | Rel.Area | Height  | Amount |
|-----|-----------|---------------------|---------|----------|---------|--------|
|     |           | min                 | mAU*min | %        | mAU     |        |
| 1   | n.a.      | 9.08                | 180.875 | 98.44    | 553.349 | n.a.   |
| 2   | n.a.      | 10.79               | 2.874   | 1.56     | 5.842   | n.a.   |

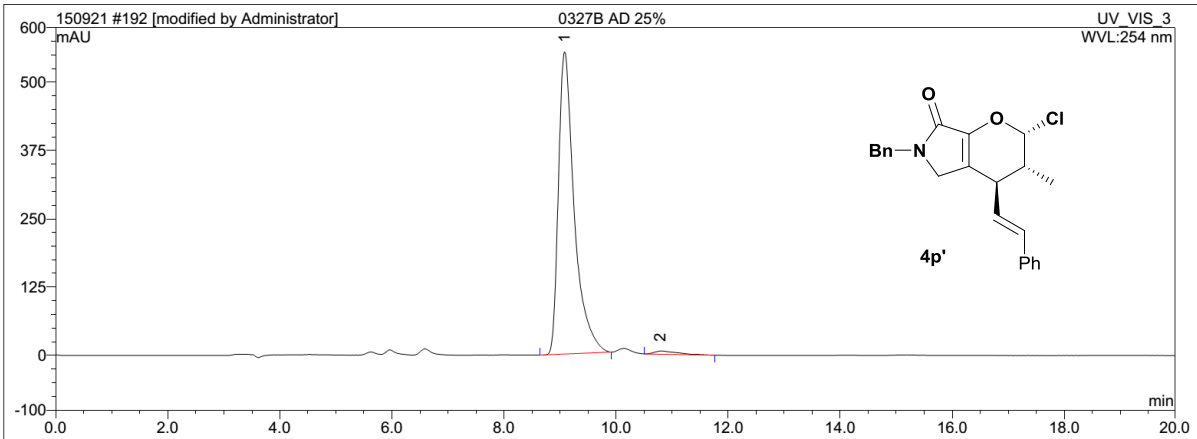

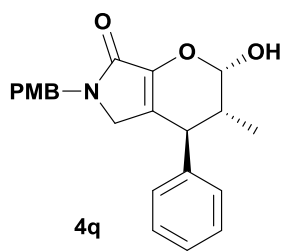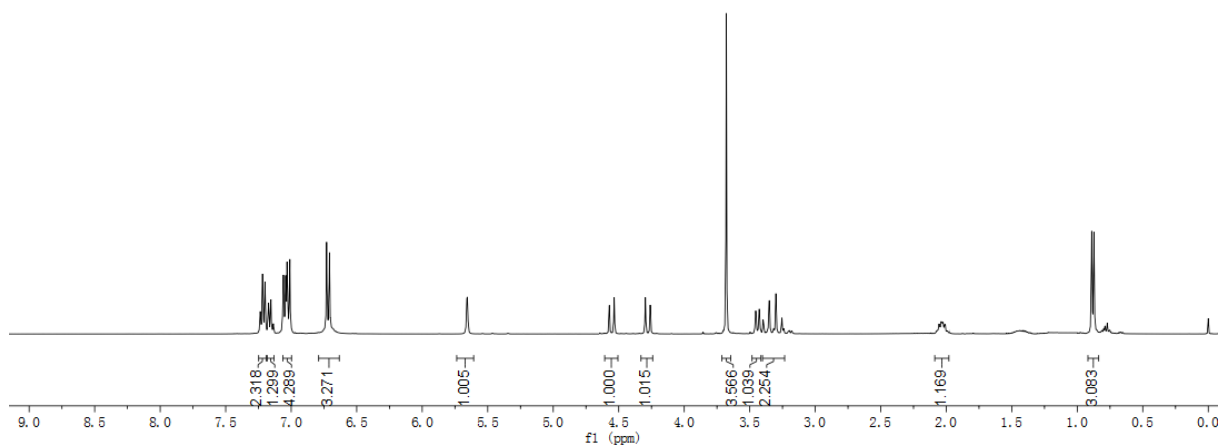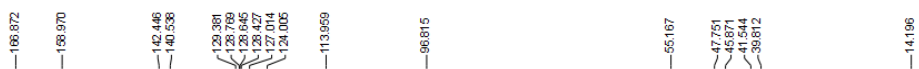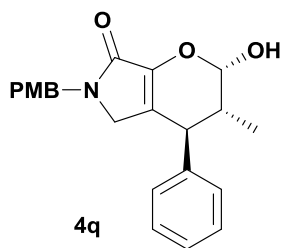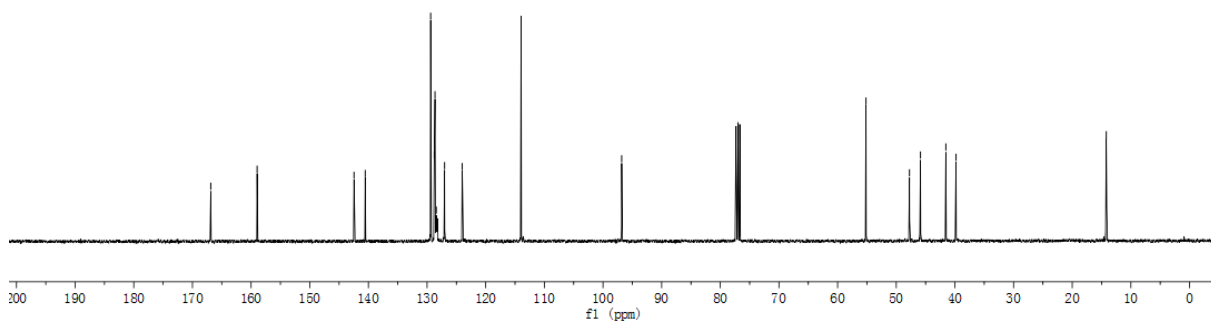



### Peak Analysis Report

| No. | Peak Name | Ret.Time (detected)<br>min | Area<br>mAU*min | Rel.Area<br>% | Height<br>mAU | Amount |
|-----|-----------|----------------------------|-----------------|---------------|---------------|--------|
| 1   | n.a.      | 6.24                       | 39.011          | 49.02         | 162.274       | n.a.   |
| 2   | n.a.      | 11.77                      | 40.565          | 50.98         | 46.928        | n.a.   |

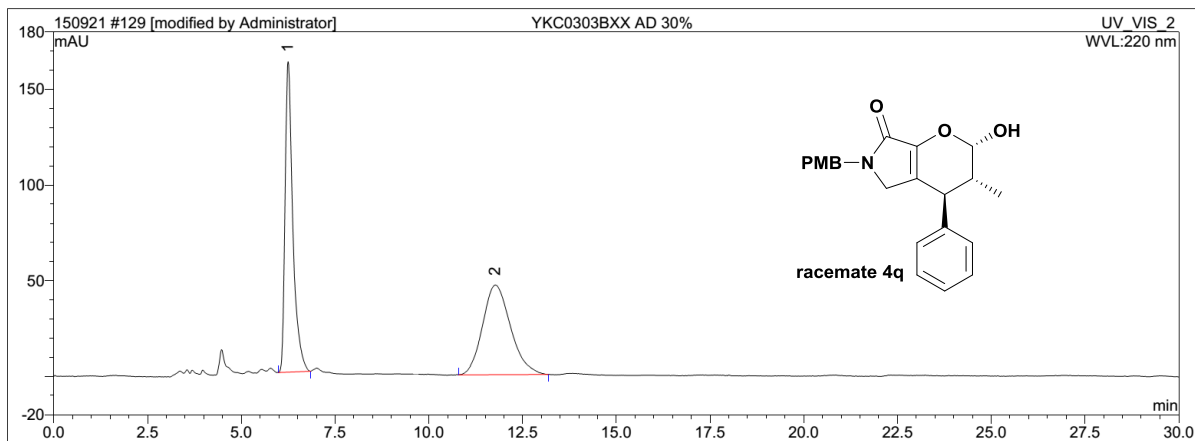

### Peak Analysis Report

| No. | Peak Name | Ret.Time (detected)<br>min | Area<br>mAU*min | Rel.Area<br>% | Height<br>mAU | Amount |
|-----|-----------|----------------------------|-----------------|---------------|---------------|--------|
| 1   | n.a.      | 6.24                       | 207.676         | 98.46         | 859.816       | n.a.   |
| 2   | n.a.      | 11.75                      | 3.238           | 1.54          | 4.163         | n.a.   |

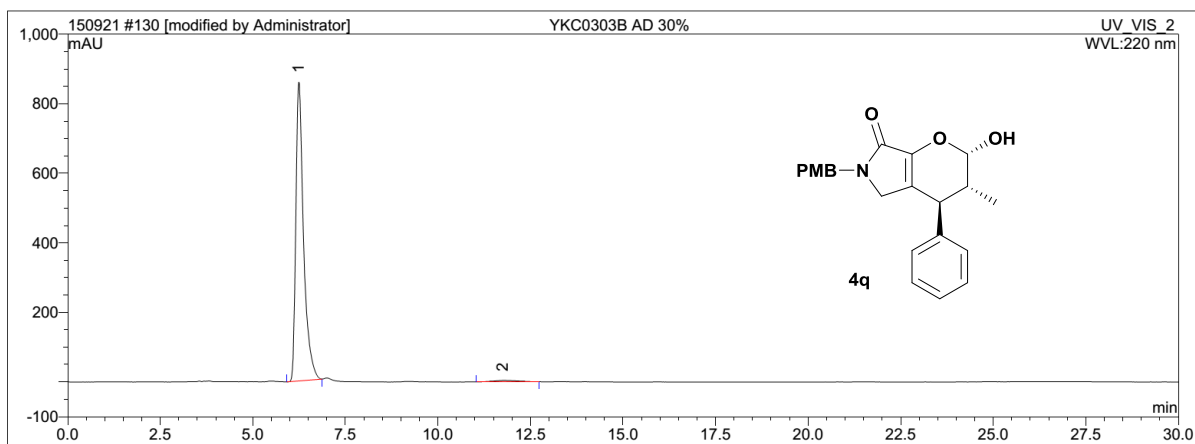

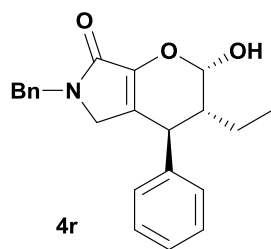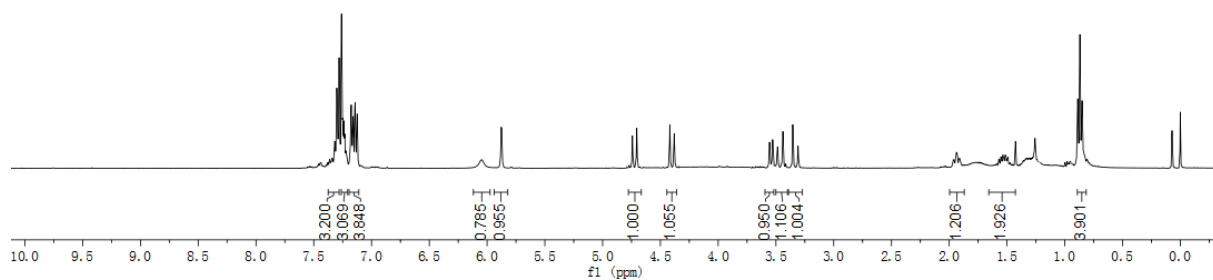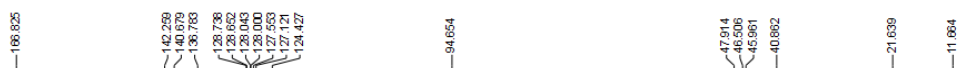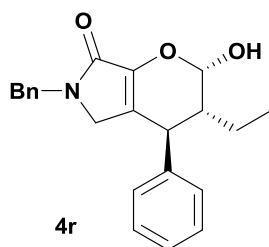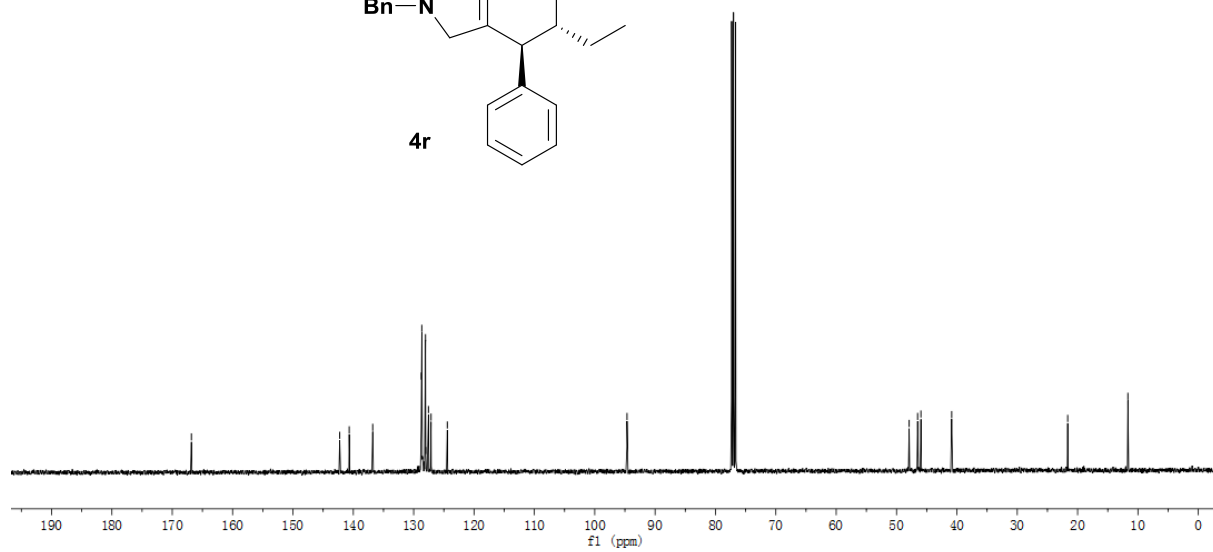

### Peak Analysis Report

| No. | Peak Name | Ret.Time (detected) | Area    | Rel.Area | Height  | Amount |
|-----|-----------|---------------------|---------|----------|---------|--------|
|     |           | min                 | mAU*min | %        | mAU     |        |
| 1   | n.a.      | 5.75                | 123.644 | 50.54    | 450.007 | n.a.   |
| 2   | n.a.      | 10.03               | 120.991 | 49.46    | 205.762 | n.a.   |

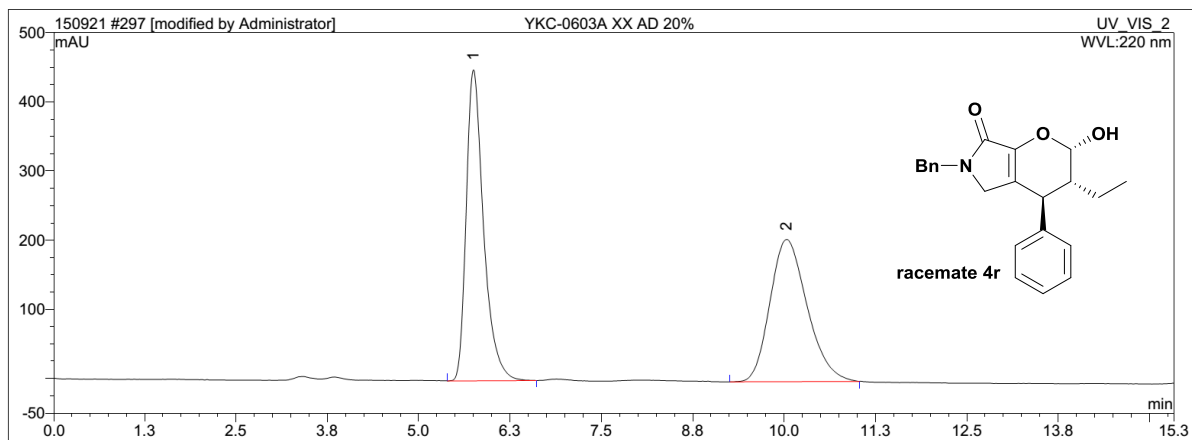

### Peak Analysis Report

| No. | Peak Name | Ret.Time (detected) | Area    | Rel.Area | Height   | Amount |
|-----|-----------|---------------------|---------|----------|----------|--------|
|     |           | min                 | mAU*min | %        | mAU      |        |
| 1   | n.a.      | 5.78                | 408.317 | 98.99    | 1532.134 | n.a.   |
| 2   | n.a.      | 10.08               | 4.172   | 1.01     | 7.760    | n.a.   |

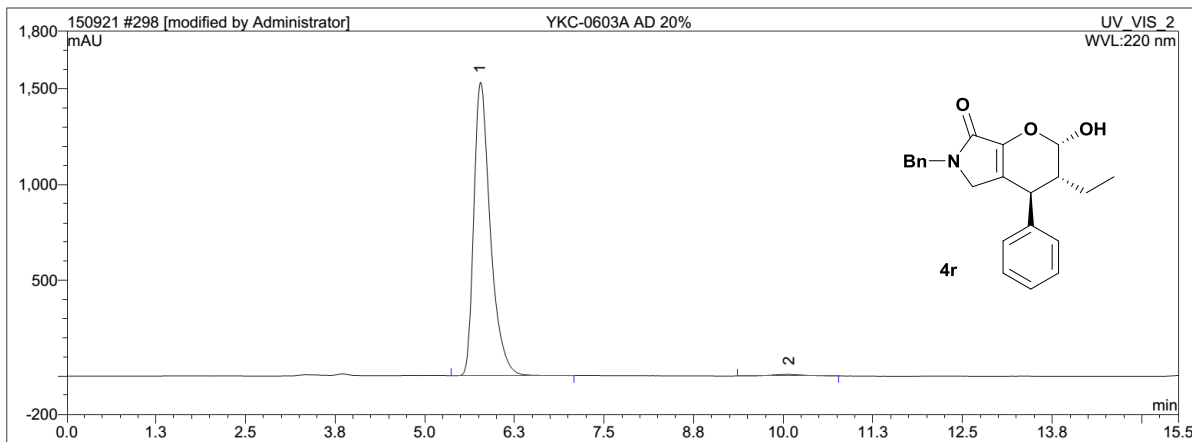

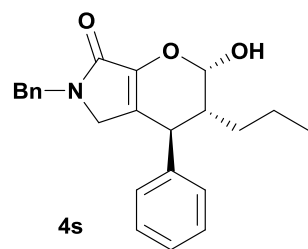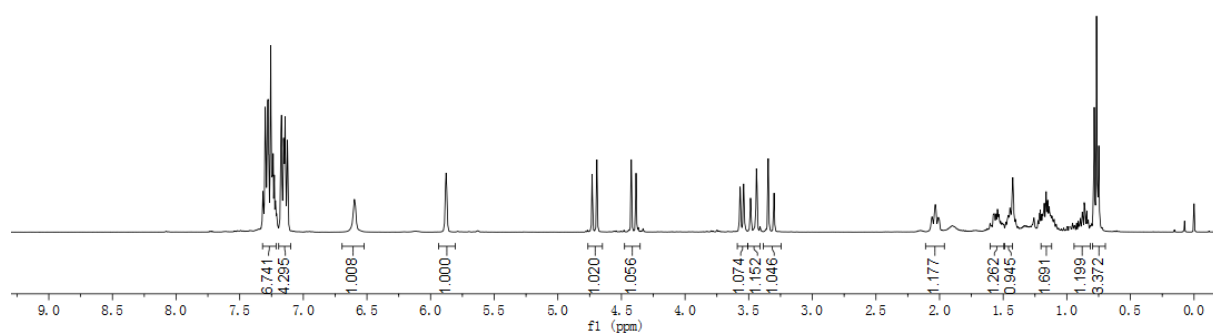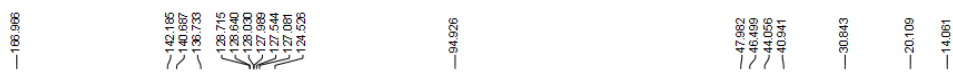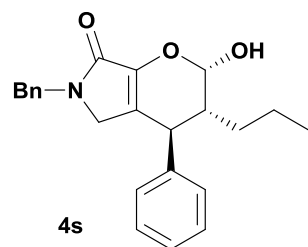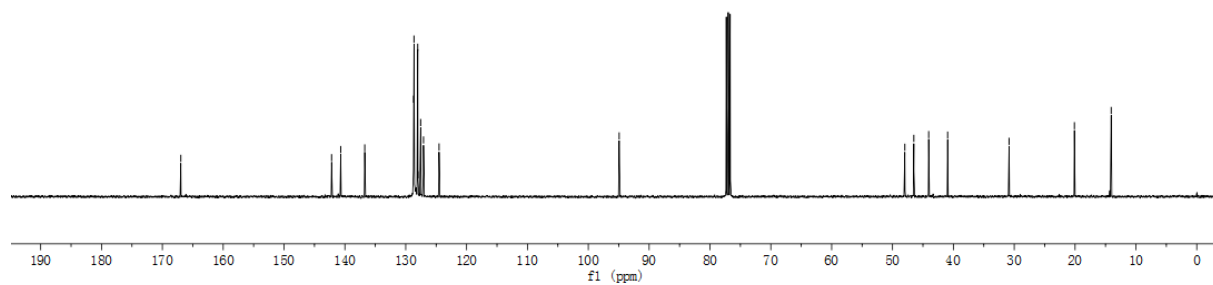

### Peak Analysis Report

| No. | Peak Name | Ret.Time (detected) | Area    | Rel.Area | Height  | Amount |
|-----|-----------|---------------------|---------|----------|---------|--------|
|     |           | min                 | mAU*min | %        | mAU     |        |
| 1   | n.a.      | 5.24                | 109.014 | 49.91    | 497.026 | n.a.   |
| 2   | n.a.      | 8.51                | 109.404 | 50.09    | 242.985 | n.a.   |

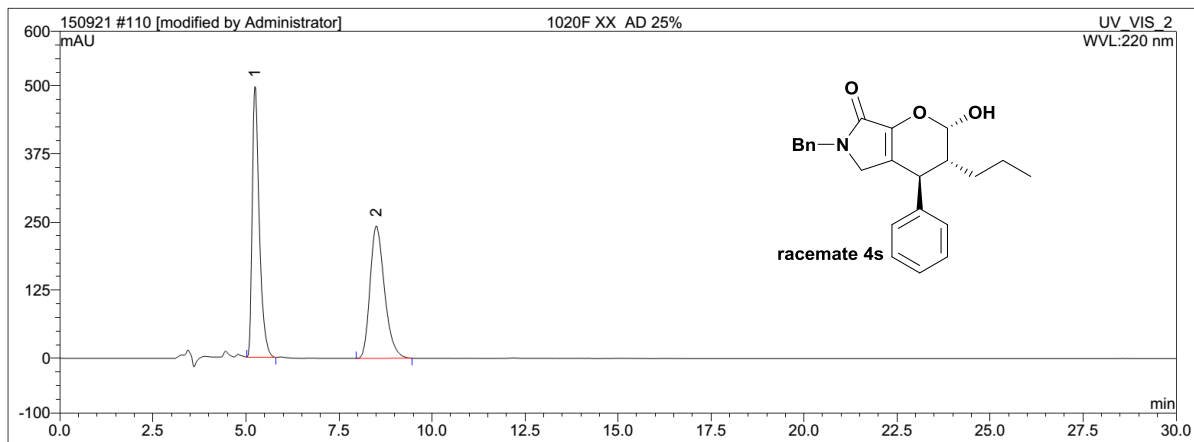

### Peak Analysis Report

| No. | Peak Name | Ret.Time (detected) | Area    | Rel.Area | Height  | Amount |
|-----|-----------|---------------------|---------|----------|---------|--------|
|     |           | min                 | mAU*min | %        | mAU     |        |
| 1   | n.a.      | 5.23                | 117.676 | 98.09    | 524.121 | n.a.   |
| 2   | n.a.      | 8.47                | 2.292   | 1.91     | 4.770   | n.a.   |

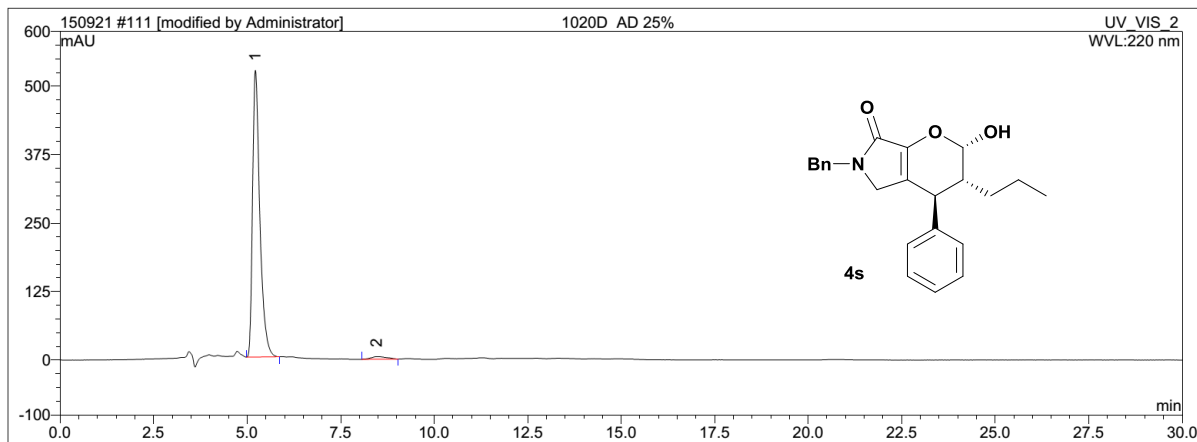

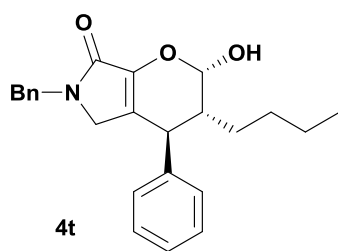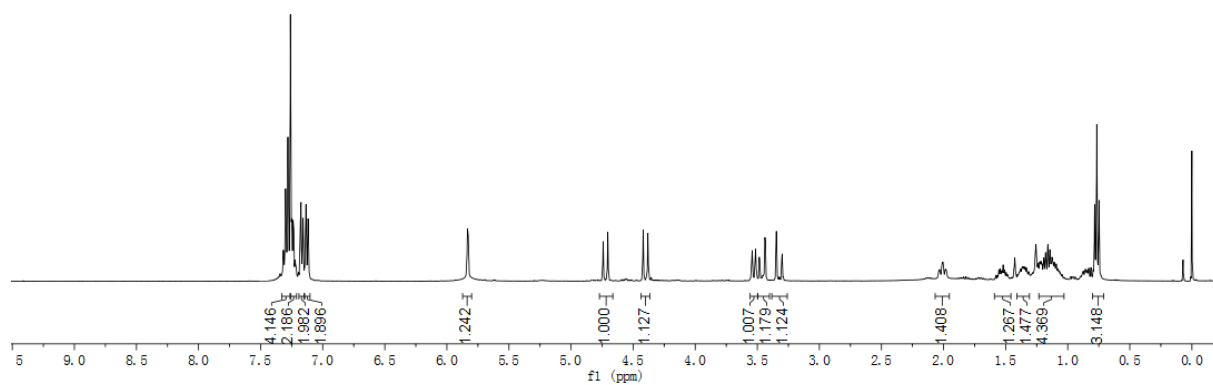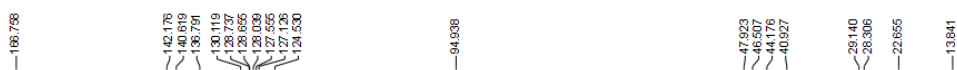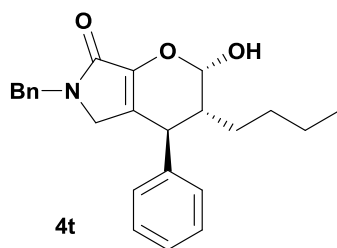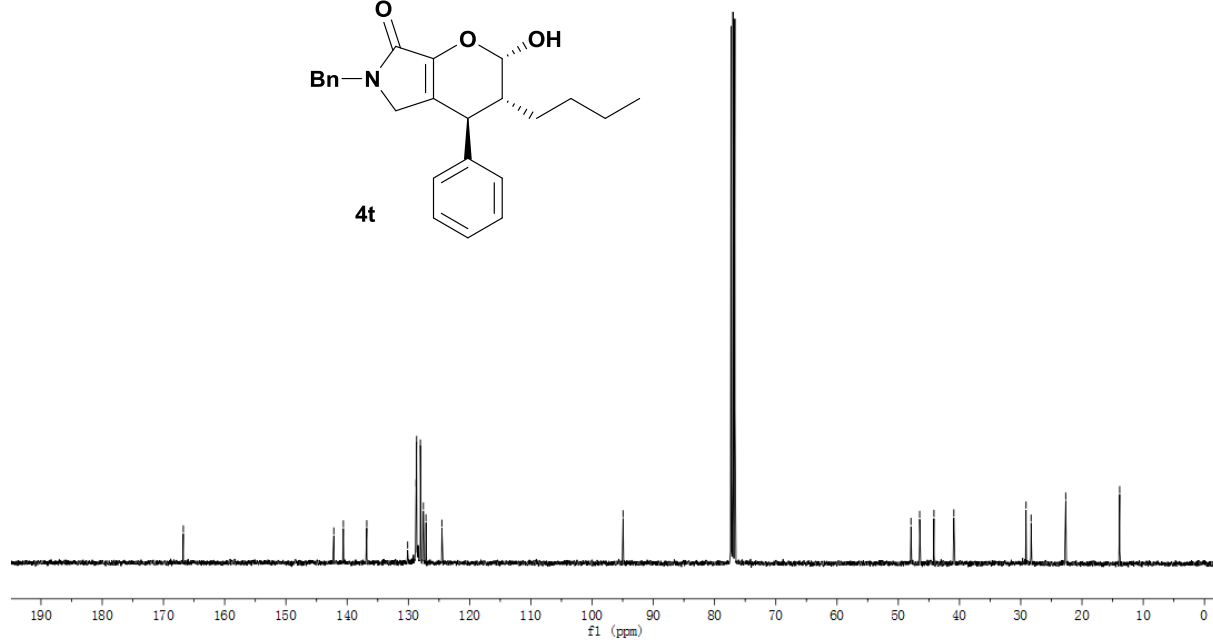

### Peak Analysis Report

| No. | Peak Name | Ret.Time (detected)<br>min | Area<br>mAU*min | Rel.Area<br>% | Height<br>mAU | Amount |
|-----|-----------|----------------------------|-----------------|---------------|---------------|--------|
| 1   | n.a.      | 5.07                       | 84.441          | 50.04         | 382.909       | n.a.   |
| 2   | n.a.      | 7.39                       | 84.305          | 49.96         | 210.589       | n.a.   |

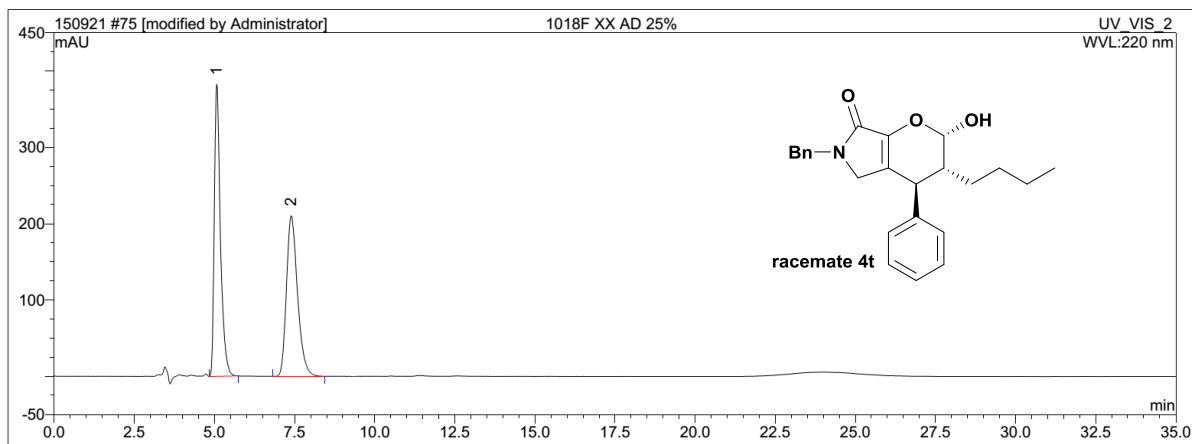

### Peak Analysis Report

| No. | Peak Name | Ret.Time (detected)<br>min | Area<br>mAU*min | Rel.Area<br>% | Height<br>mAU | Amount |
|-----|-----------|----------------------------|-----------------|---------------|---------------|--------|
| 1   | n.a.      | 5.08                       | 79.573          | 98.70         | 363.694       | n.a.   |
| 2   | n.a.      | 7.40                       | 1.047           | 1.30          | 2.868         | n.a.   |

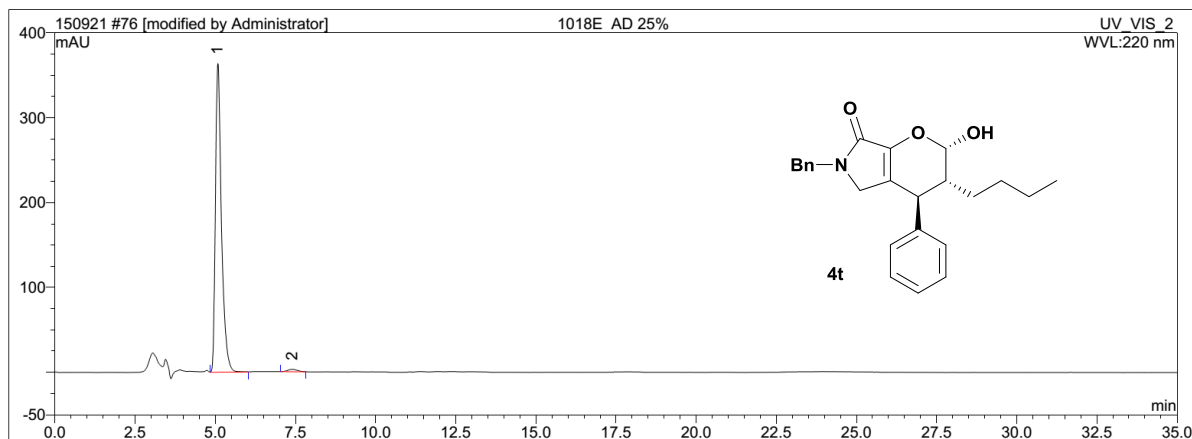

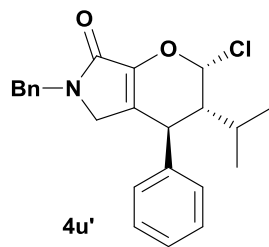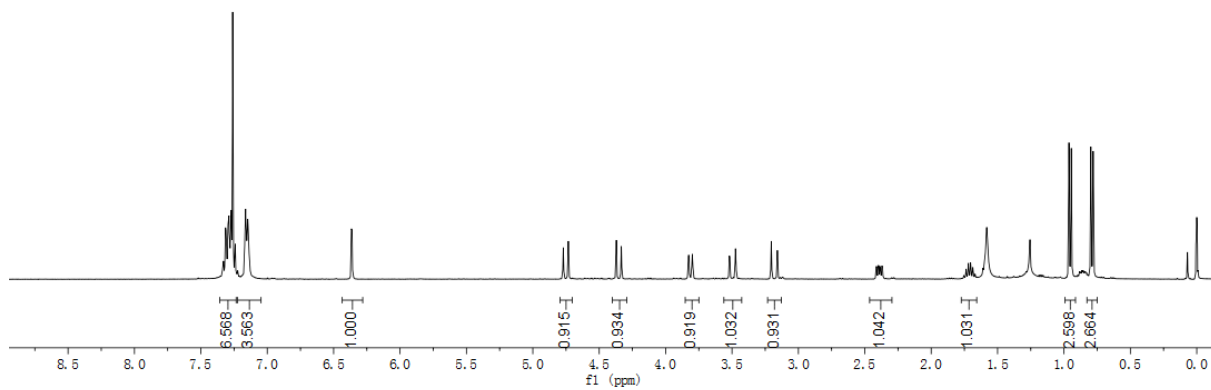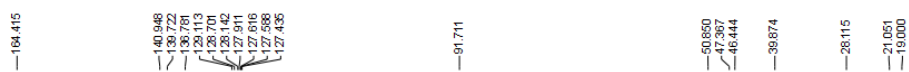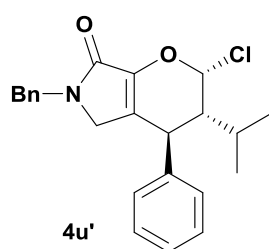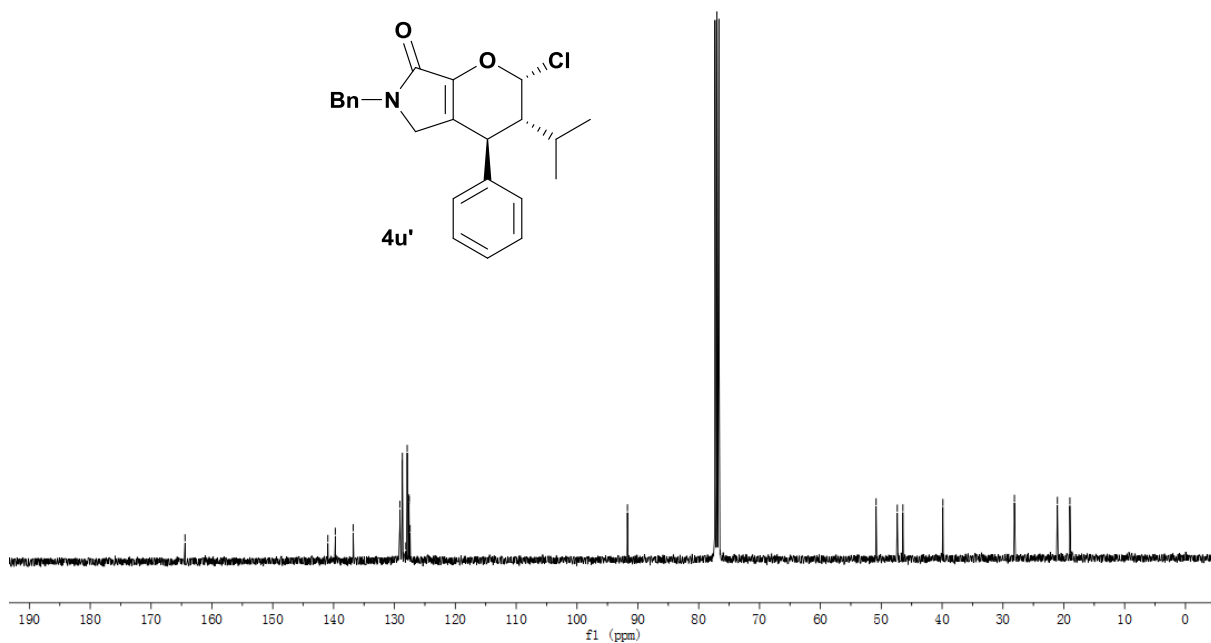



### Peak Analysis Report

| No. | Peak Name | Ret.Time (detected)<br>min | Area<br>mAU*min | Rel.Area<br>% | Height<br>mAU | Amount |
|-----|-----------|----------------------------|-----------------|---------------|---------------|--------|
| 1   | n.a.      | 8.77                       | 21.854          | 50.37         | 52.847        | n.a.   |
| 2   | n.a.      | 13.21                      | 21.529          | 49.63         | 33.538        | n.a.   |

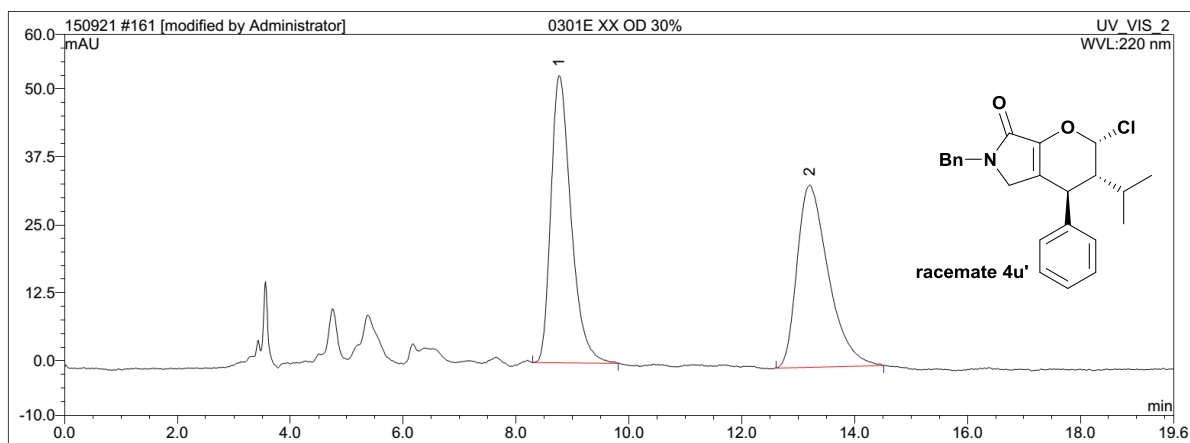

### Peak Analysis Report

| No. | Peak Name | Ret.Time (detected)<br>min | Area<br>mAU*min | Rel.Area<br>% | Height<br>mAU | Amount |
|-----|-----------|----------------------------|-----------------|---------------|---------------|--------|
| 1   | n.a.      | 8.74                       | 0.358           | 0.96          | 1.294         | n.a.   |
| 2   | n.a.      | 13.03                      | 37.169          | 99.04         | 58.390        | n.a.   |

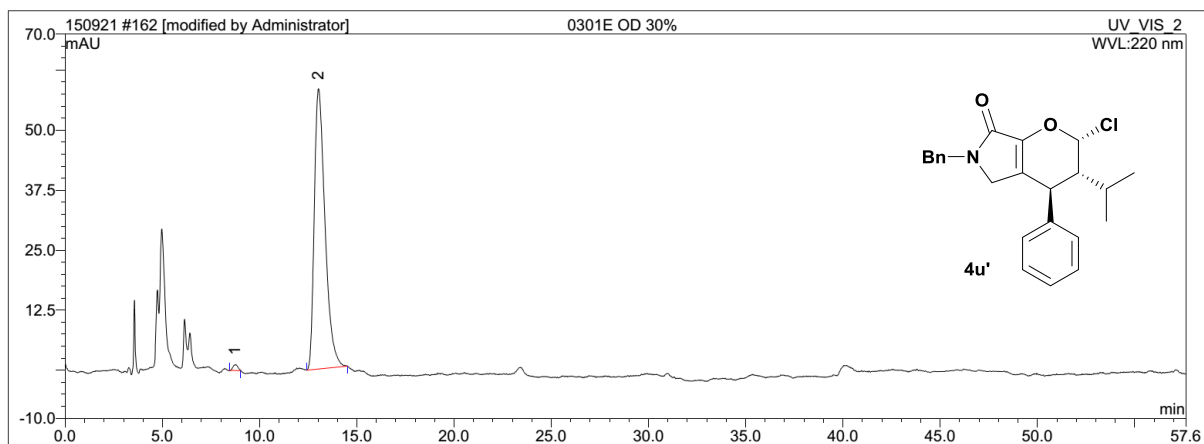

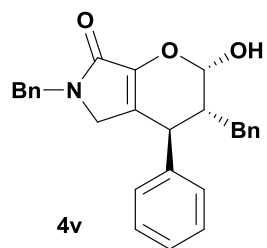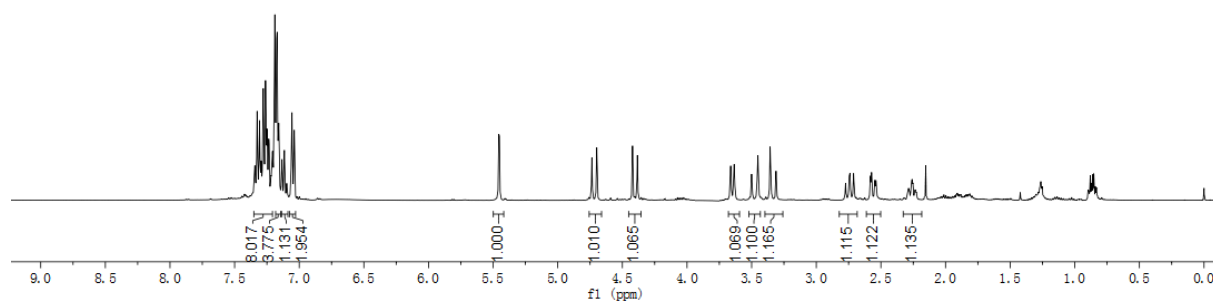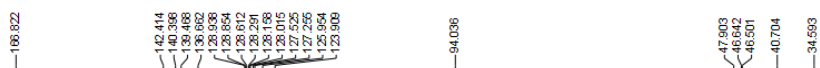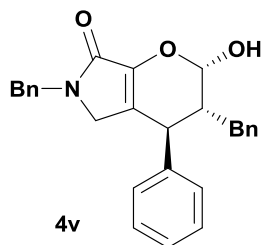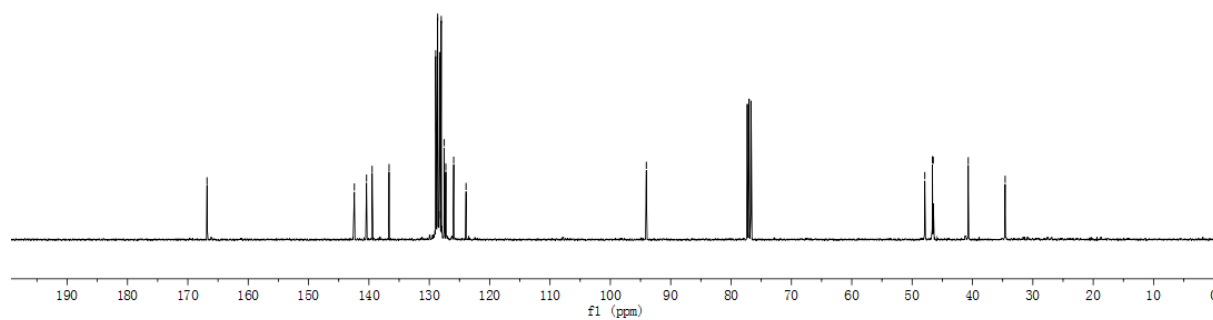

### Peak Analysis Report

| No. | Peak Name | Ret.Time (detected)<br>min | Area<br>mAU*min | Rel.Area<br>% | Height<br>mAU | Amount |
|-----|-----------|----------------------------|-----------------|---------------|---------------|--------|
| 1   | n.a.      | 6.24                       | 40.178          | 49.75         | 161.247       | n.a.   |
| 2   | n.a.      | 7.78                       | 40.578          | 50.25         | 133.644       | n.a.   |

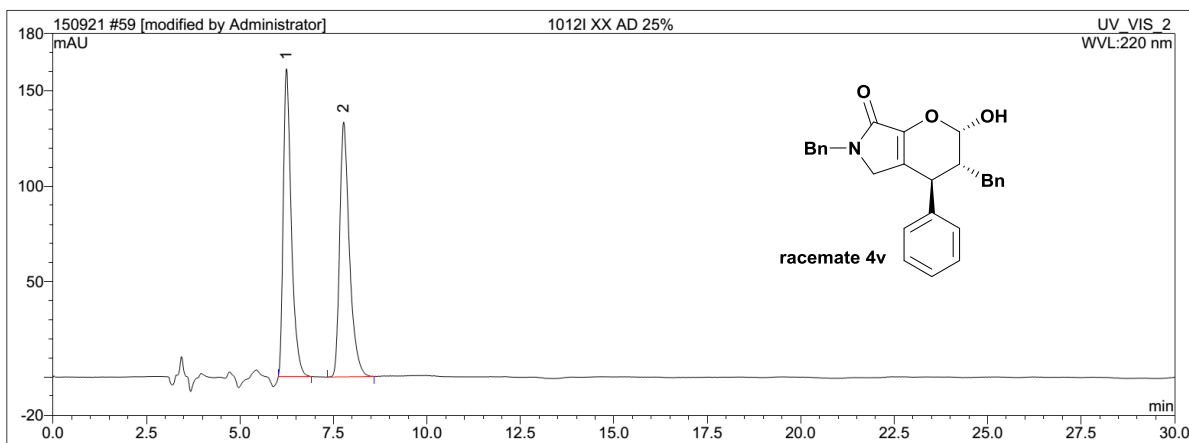

### Peak Analysis Report

| No. | Peak Name | Ret.Time (detected)<br>min | Area<br>mAU*min | Rel.Area<br>% | Height<br>mAU | Amount |
|-----|-----------|----------------------------|-----------------|---------------|---------------|--------|
| 1   | n.a.      | 6.25                       | 46.878          | 99.27         | 184.965       | n.a.   |
| 2   | n.a.      | 7.78                       | 0.345           | 0.73          | 0.832         | n.a.   |

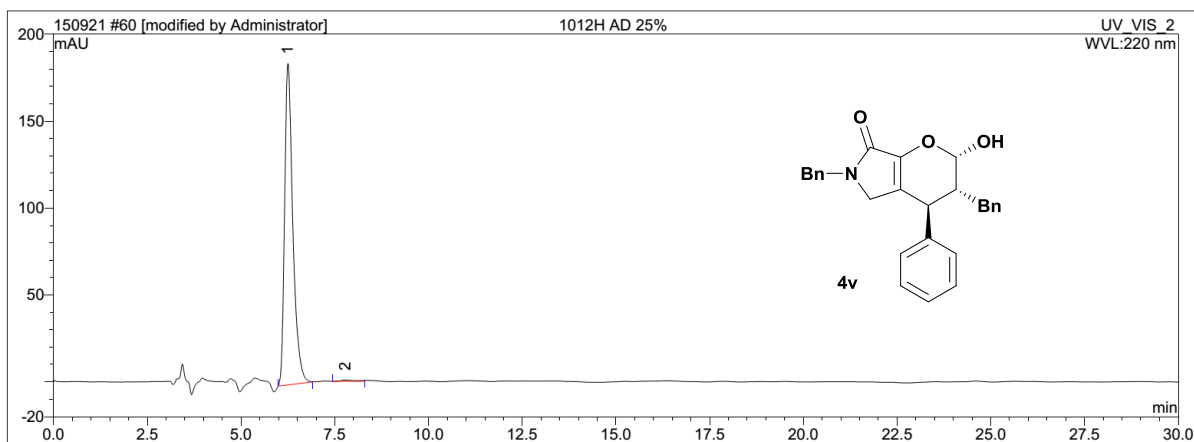

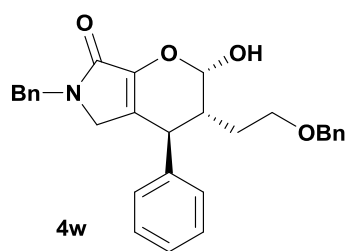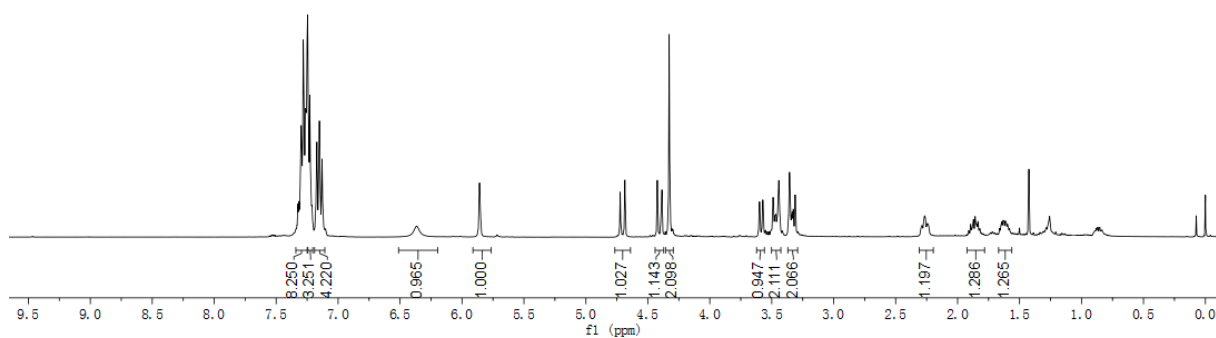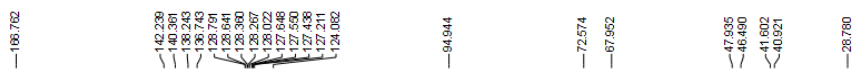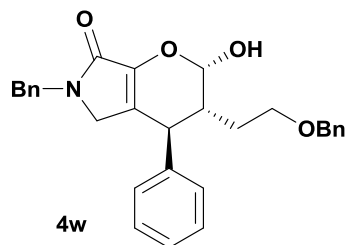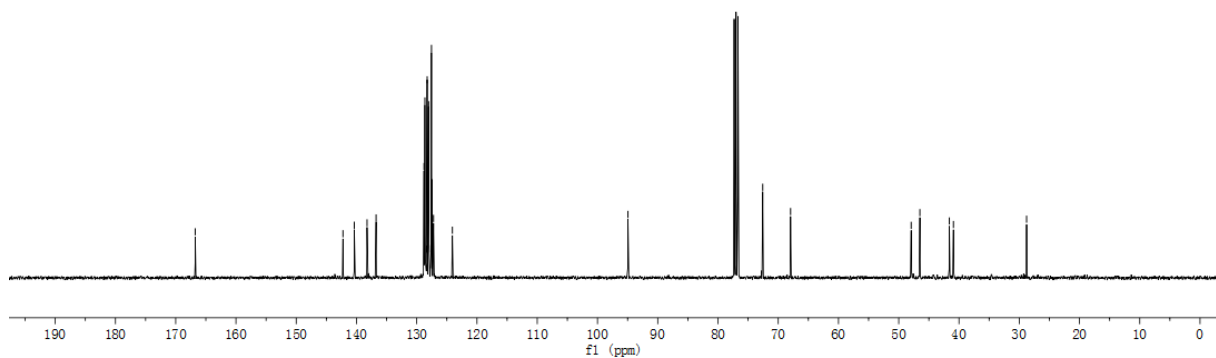

### Peak Analysis Report

| No. | Peak Name | Ret.Time (detected)<br>min | Area<br>mAU*min | Rel.Area<br>% | Height<br>mAU | Amount |
|-----|-----------|----------------------------|-----------------|---------------|---------------|--------|
| 1   | n.a.      | 7.13                       | 51.490          | 49.94         | 167.911       | n.a.   |
| 2   | n.a.      | 10.57                      | 51.610          | 50.06         | 97.191        | n.a.   |

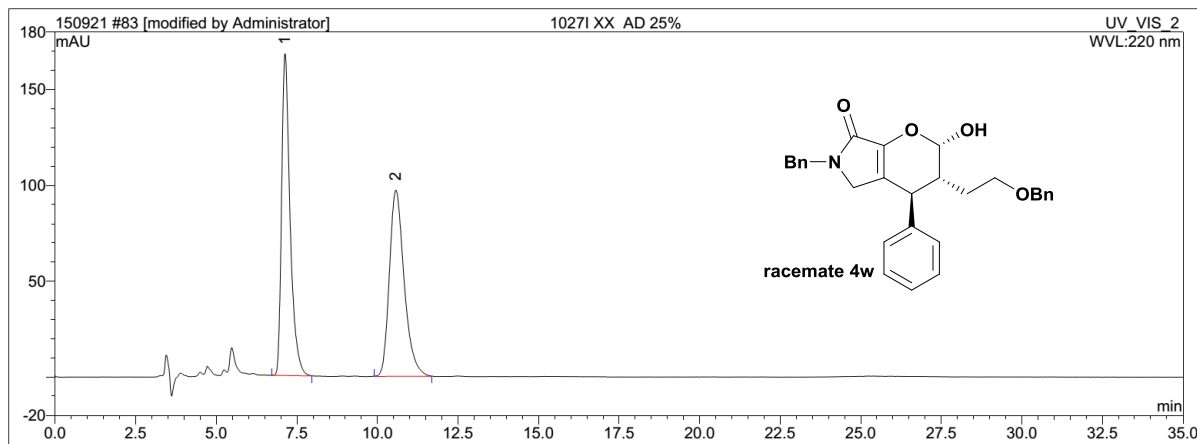

### Peak Analysis Report

| No. | Peak Name | Ret.Time (detected)<br>min | Area<br>mAU*min | Rel.Area<br>% | Height<br>mAU | Amount |
|-----|-----------|----------------------------|-----------------|---------------|---------------|--------|
| 1   | n.a.      | 7.11                       | 294.961         | 99.44         | 945.491       | n.a.   |
| 2   | n.a.      | 10.56                      | 1.673           | 0.56          | 4.329         | n.a.   |

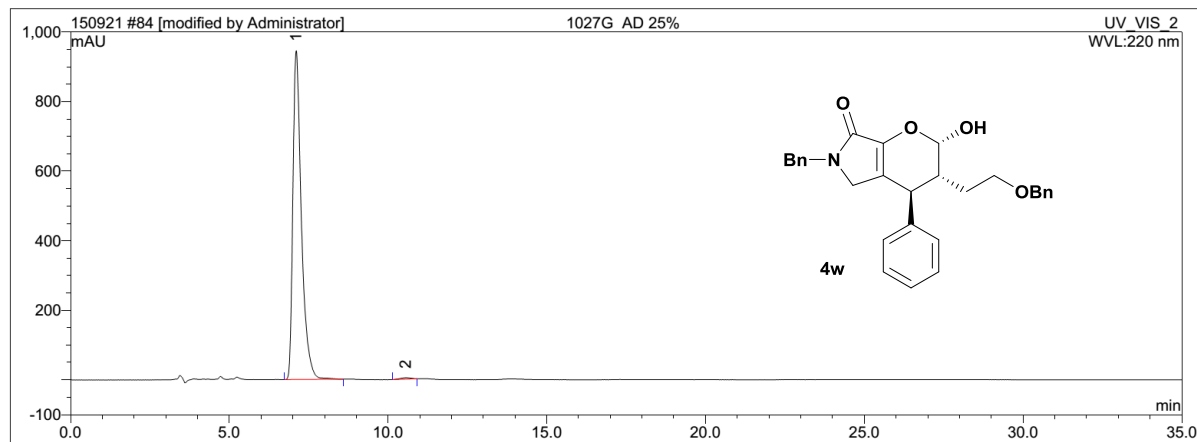

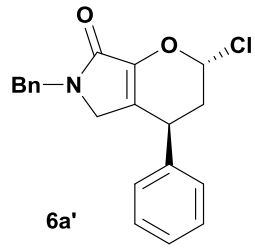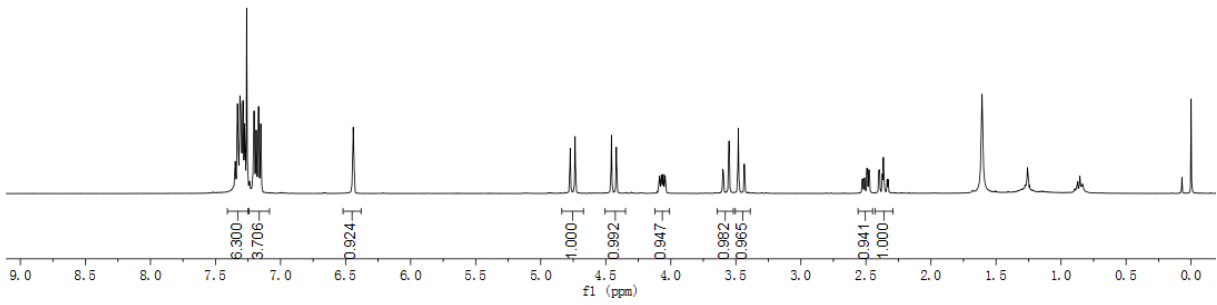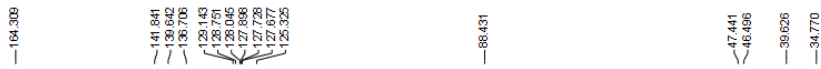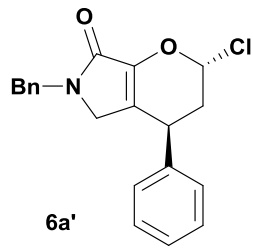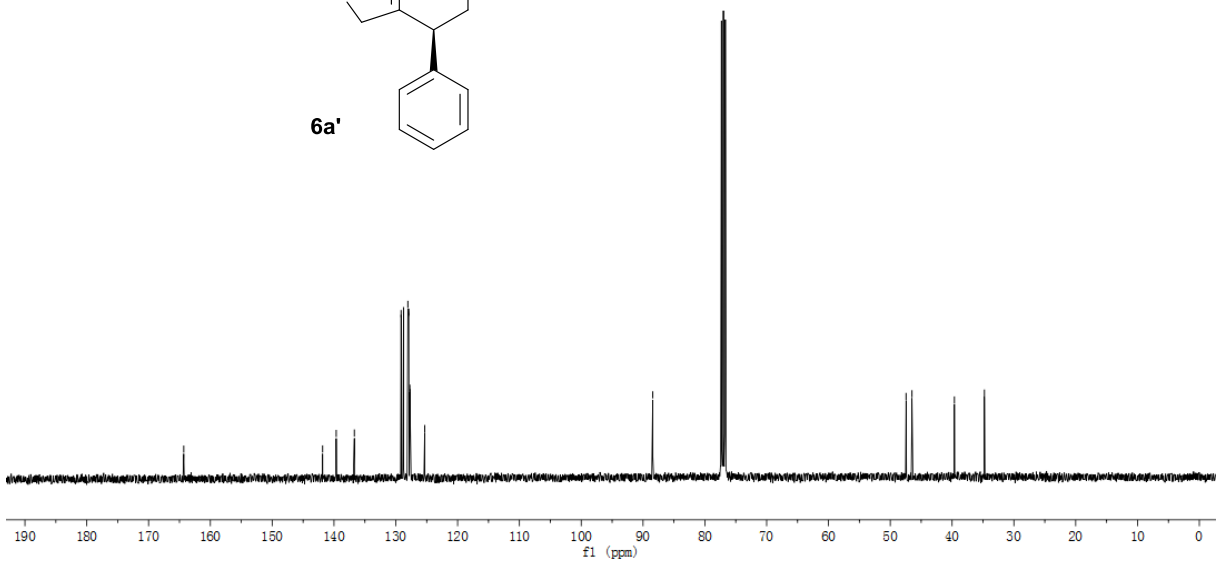

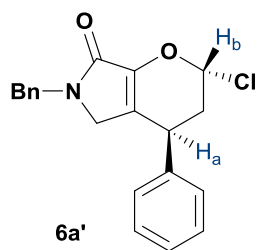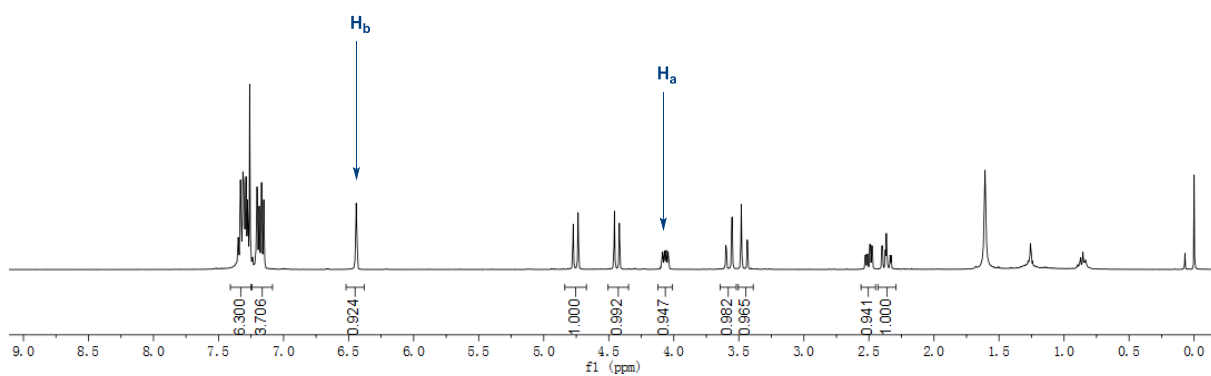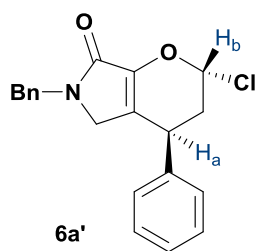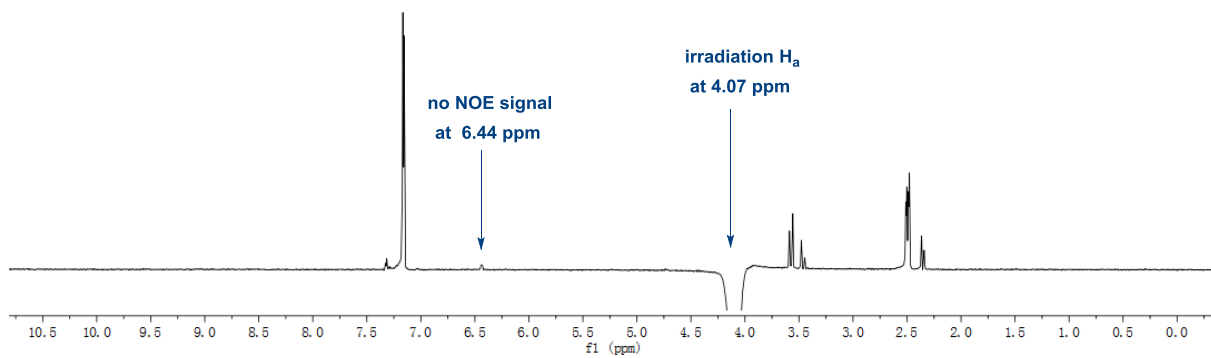

### Peak Analysis Report

| No. | Peak Name | Ret.Time (detected) | Area    | Rel.Area | Height | Amount |
|-----|-----------|---------------------|---------|----------|--------|--------|
|     |           | min                 | mAU*min | %        | mAU    |        |
| 1   | n.a.      | 15.02               | 63.622  | 50.88    | 97.648 | n.a.   |
| 2   | n.a.      | 20.89               | 61.411  | 49.12    | 49.688 | n.a.   |

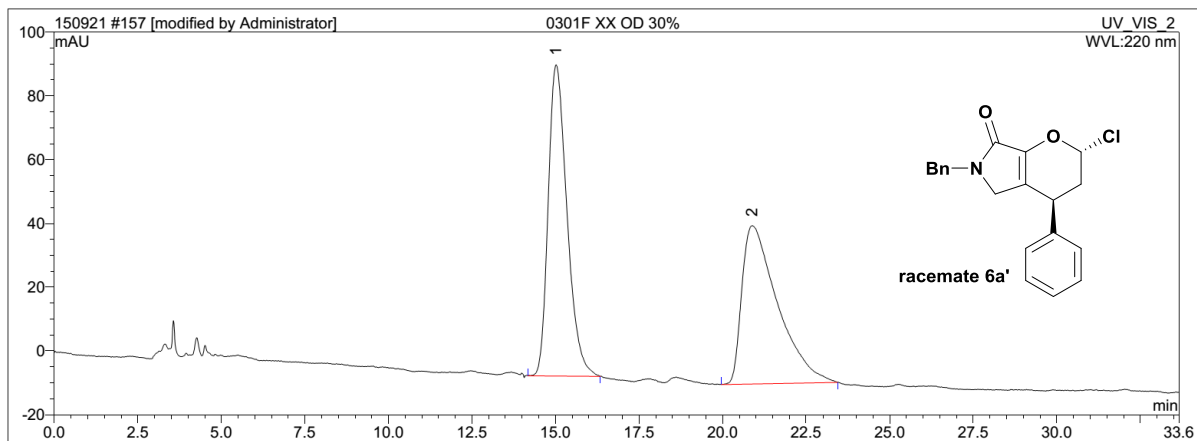

### Peak Analysis Report

| No. | Peak Name | Ret.Time (detected) | Area    | Rel.Area | Height | Amount |
|-----|-----------|---------------------|---------|----------|--------|--------|
|     |           | min                 | mAU*min | %        | mAU    |        |
| 1   | n.a.      | 14.96               | 48.052  | 99.79    | 75.858 | n.a.   |
| 2   | n.a.      | 20.92               | 0.101   | 0.21     | 0.455  | n.a.   |

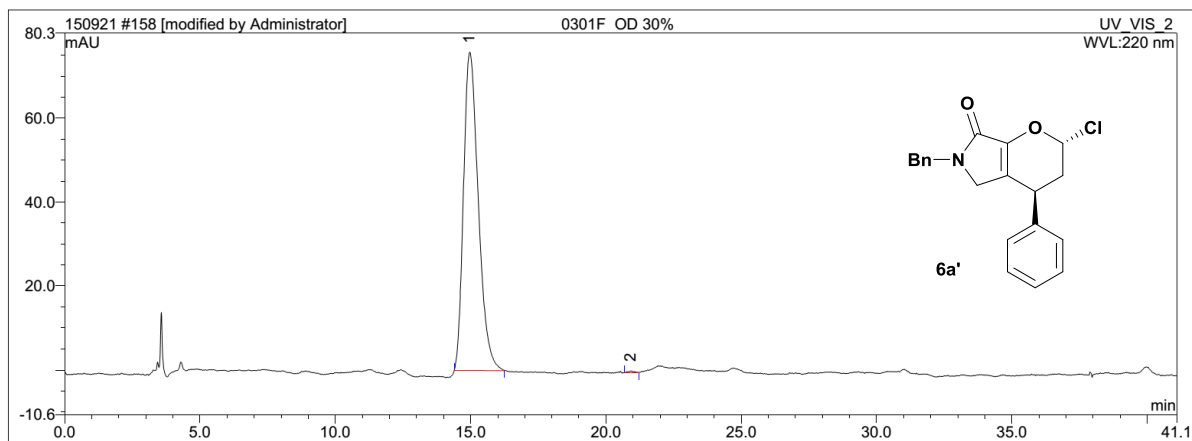



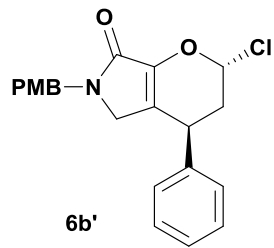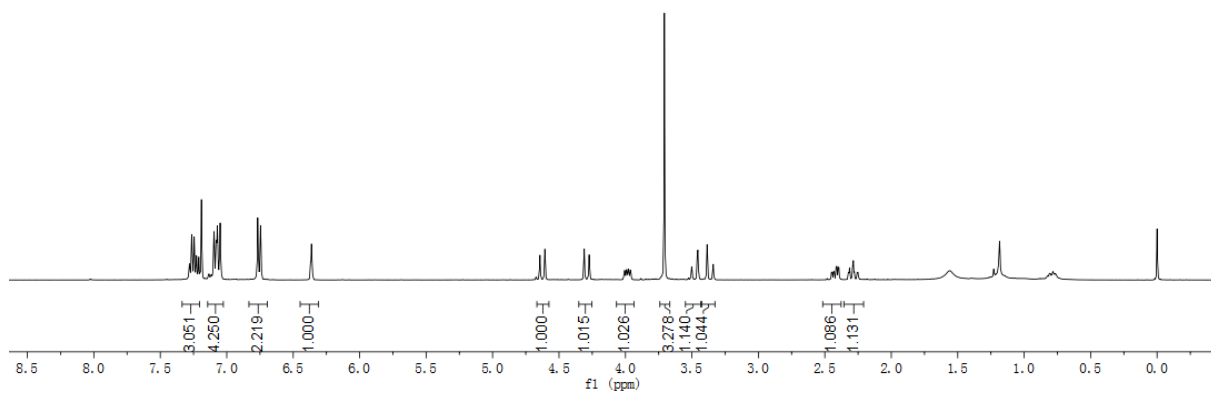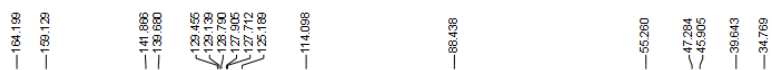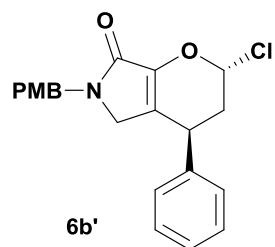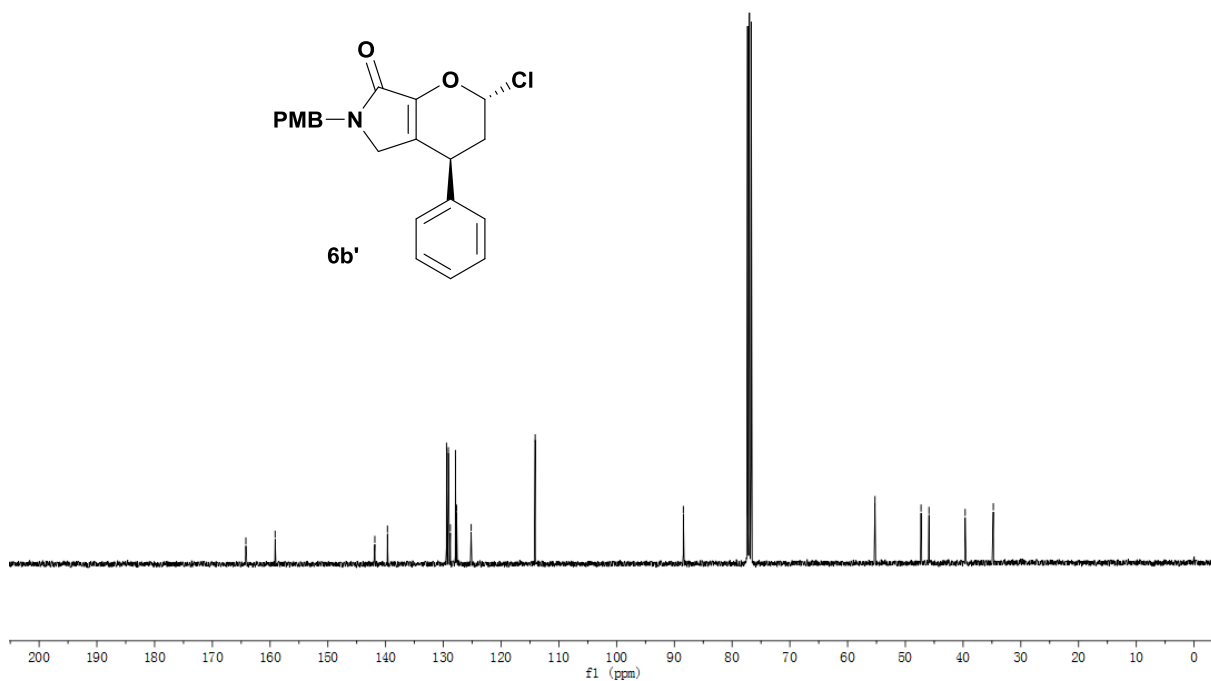

### Peak Analysis Report

| No. | Peak Name | Ret.Time (detected) | Area    | Rel.Area | Height  | Amount |
|-----|-----------|---------------------|---------|----------|---------|--------|
|     |           | min                 | mAU*min | %        | mAU     |        |
| 1   | n.a.      | 23.28               | 232.660 | 50.14    | 297.723 | n.a.   |
| 2   | n.a.      | 26.65               | 231.351 | 49.86    | 262.973 | n.a.   |

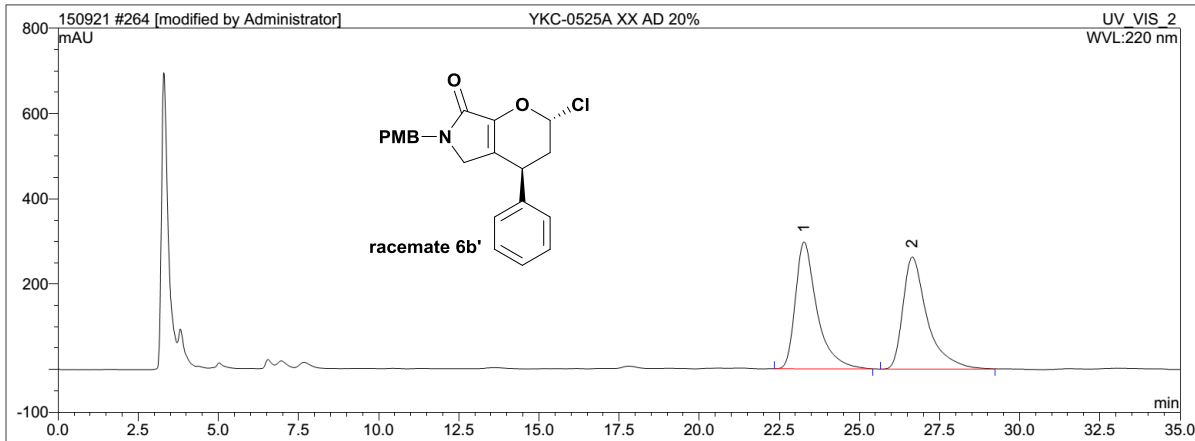

### Peak Analysis Report

| No. | Peak Name | Ret.Time (detected) | Area    | Rel.Area | Height  | Amount |
|-----|-----------|---------------------|---------|----------|---------|--------|
|     |           | min                 | mAU*min | %        | mAU     |        |
| 1   | n.a.      | 22.87               | 119.965 | 97.41    | 146.121 | n.a.   |
| 2   | n.a.      | 26.50               | 3.192   | 2.59     | 4.370   | n.a.   |

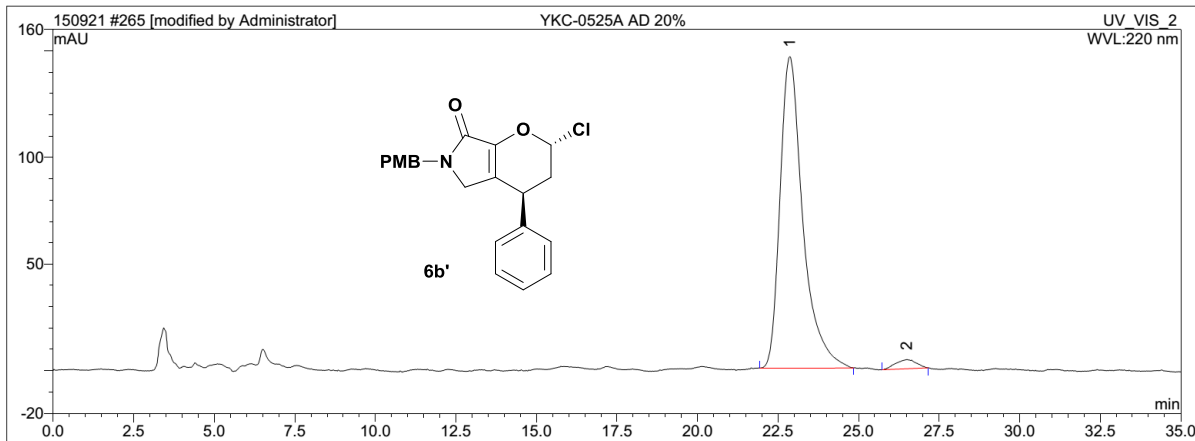

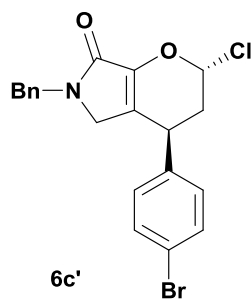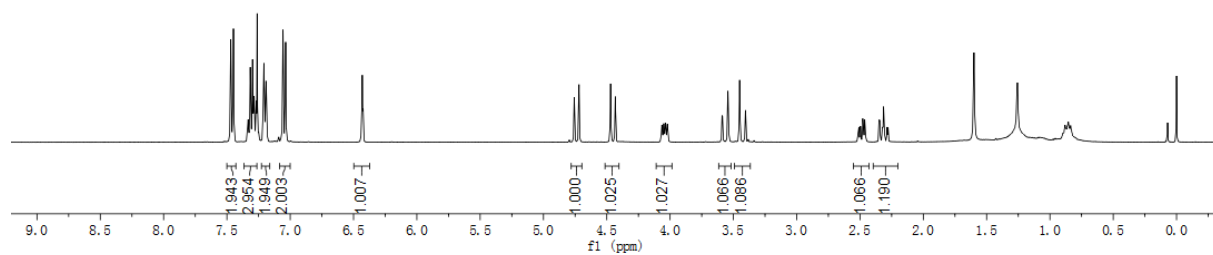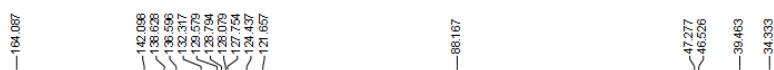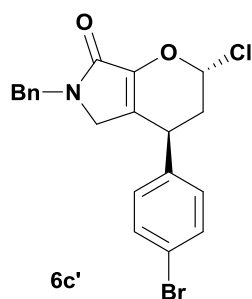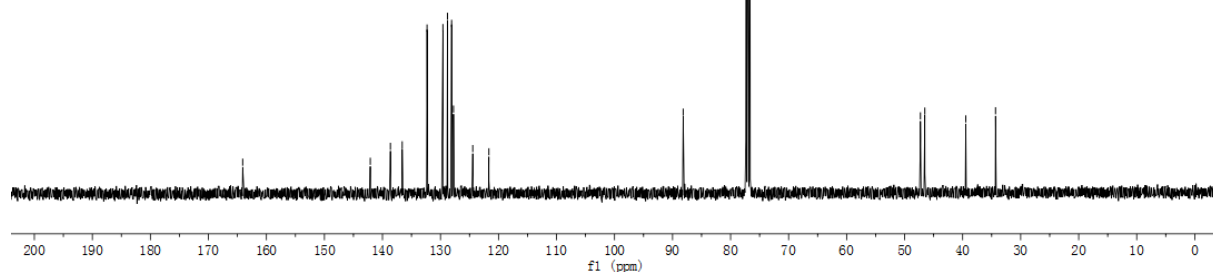

### Peak Analysis Report

| No. | Peak Name | Ret.Time (detected) | Area    | Rel.Area | Height | Amount |
|-----|-----------|---------------------|---------|----------|--------|--------|
|     |           | min                 | mAU*min | %        | mAU    |        |
| 1   | n.a.      | 17.03               | 38.916  | 49.28    | 46.102 | n.a.   |
| 2   | n.a.      | 22.84               | 40.048  | 50.72    | 37.979 | n.a.   |

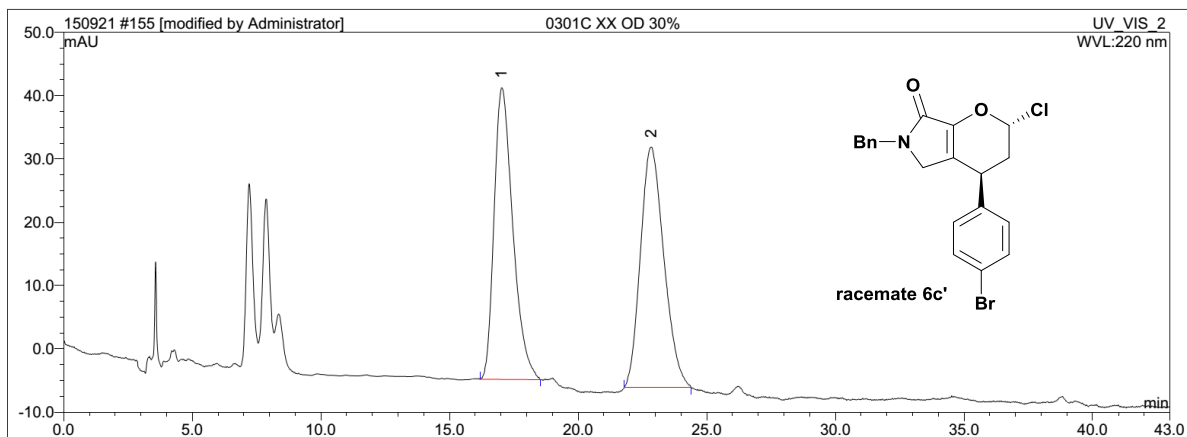

### Peak Analysis Report

| No. | Peak Name | Ret.Time (detected) | Area    | Rel.Area | Height | Amount |
|-----|-----------|---------------------|---------|----------|--------|--------|
|     |           | min                 | mAU*min | %        | mAU    |        |
| 1   | n.a.      | 16.79               | 75.433  | 98.44    | 90.166 | n.a.   |
| 2   | n.a.      | 22.55               | 1.195   | 1.56     | 1.712  | n.a.   |

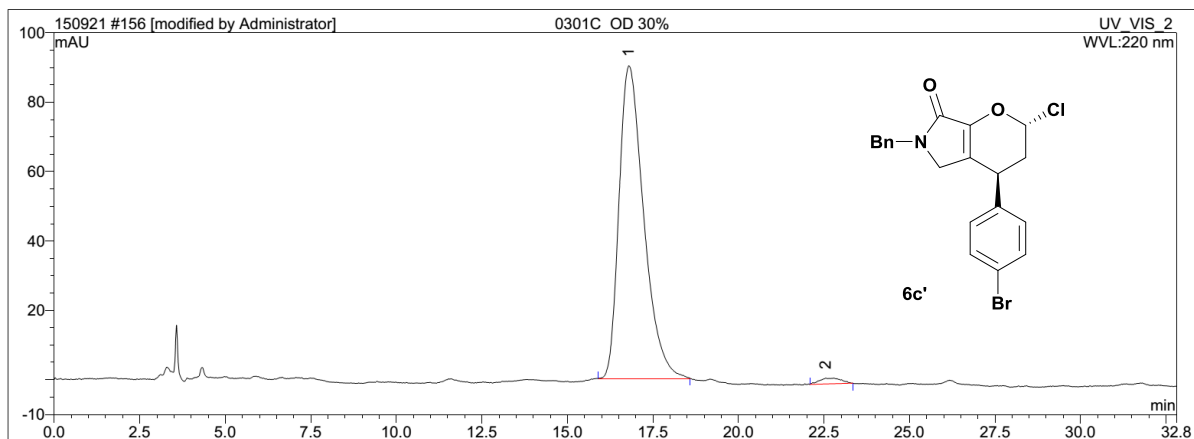

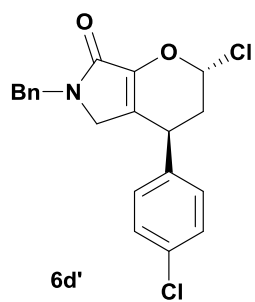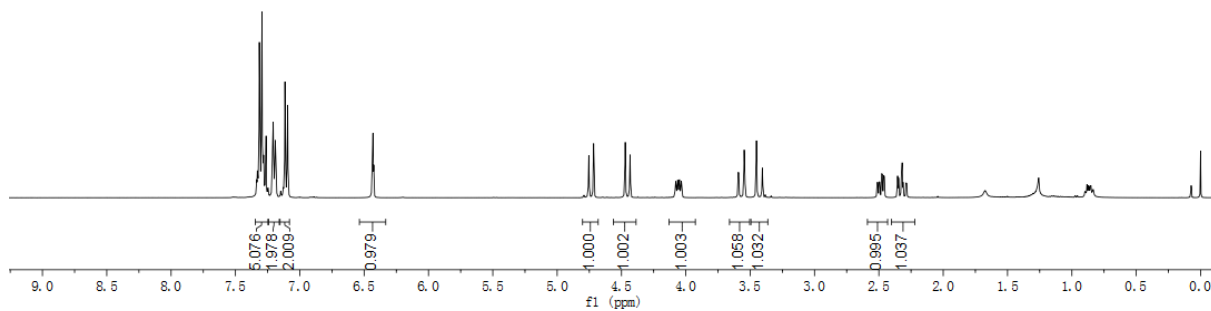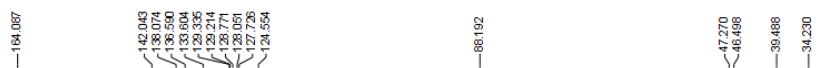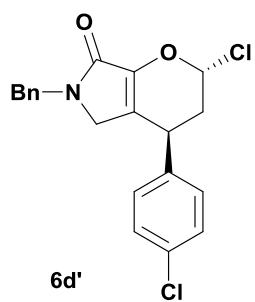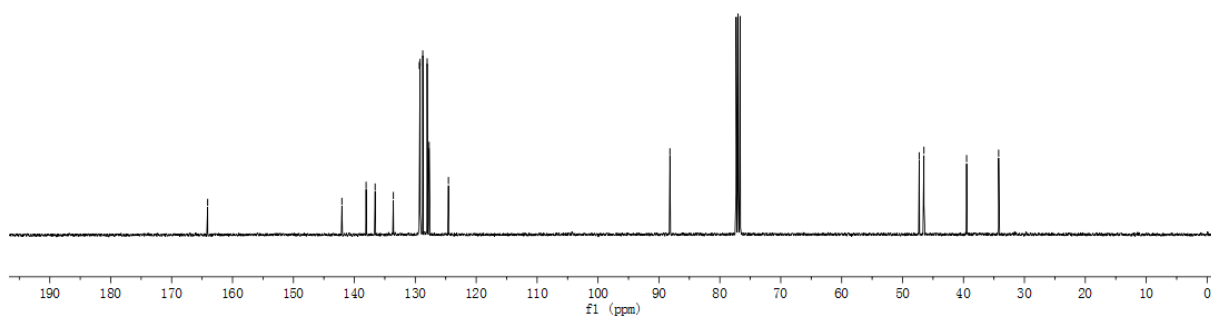

### Peak Analysis Report

| No. | Peak Name | Ret.Time (detected) | Area    | Rel.Area | Height  | Amount |
|-----|-----------|---------------------|---------|----------|---------|--------|
|     |           | min                 | mAU*min | %        | mAU     |        |
| 1   | n.a.      | 13.38               | 133.239 | 49.87    | 278.990 | n.a.   |
| 2   | n.a.      | 14.77               | 133.922 | 50.13    | 256.485 | n.a.   |

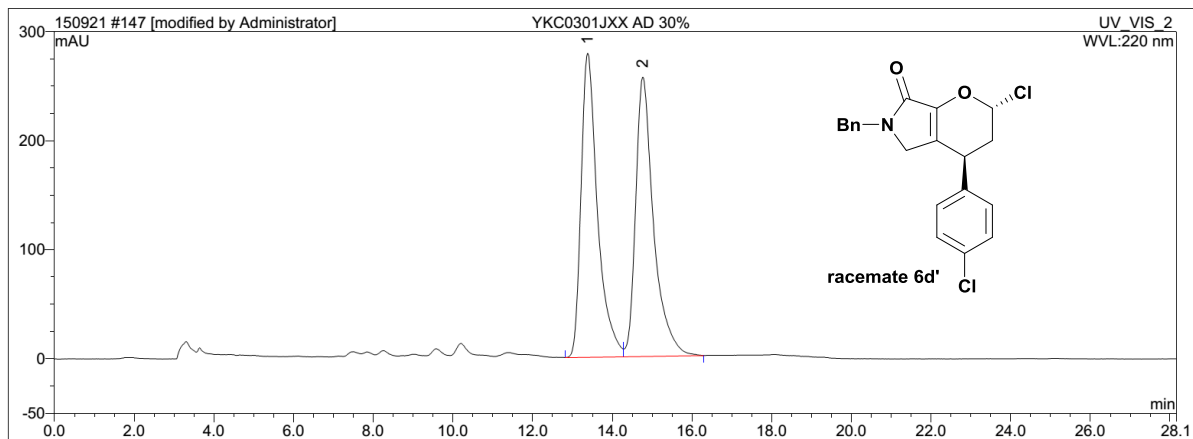

### Peak Analysis Report

| No. | Peak Name | Ret.Time (detected) | Area    | Rel.Area | Height   | Amount |
|-----|-----------|---------------------|---------|----------|----------|--------|
|     |           | min                 | mAU*min | %        | mAU      |        |
| 1   | n.a.      | 13.38               | 608.404 | 97.39    | 1263.769 | n.a.   |
| 2   | n.a.      | 14.79               | 16.332  | 2.61     | 39.536   | n.a.   |

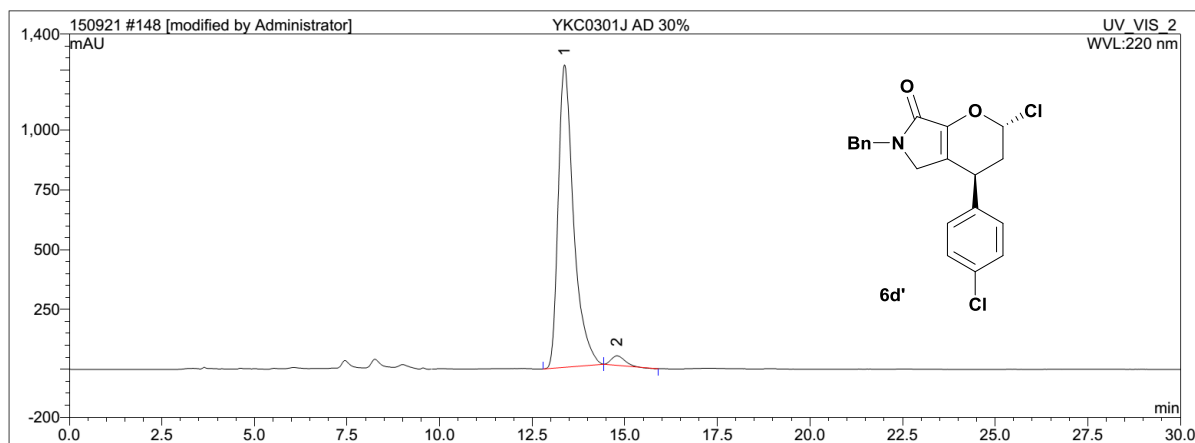

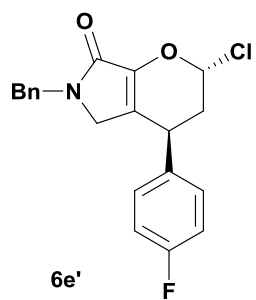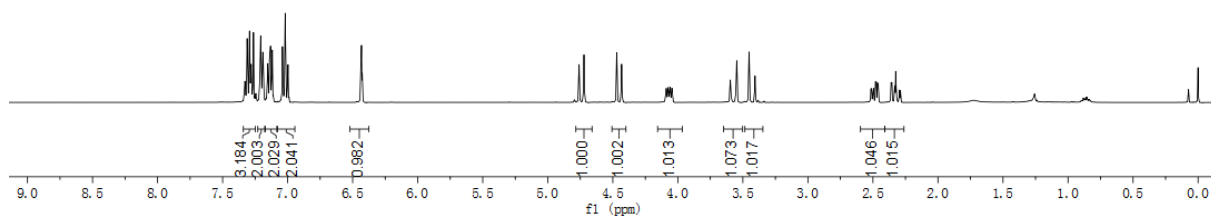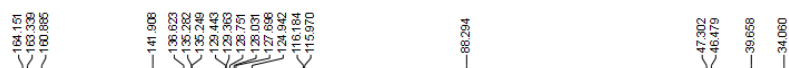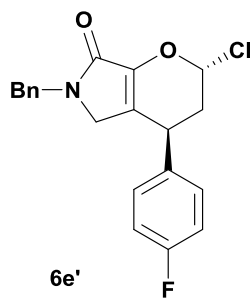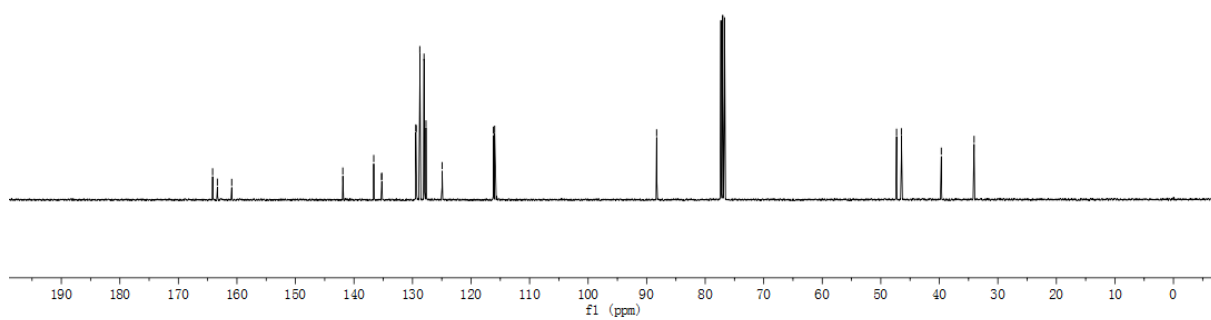

### Peak Analysis Report

| No. | Peak Name | Ret.Time (detected)<br>min | Area<br>mAU*min | Rel.Area<br>% | Height<br>mAU | Amount |
|-----|-----------|----------------------------|-----------------|---------------|---------------|--------|
| 1   | n.a.      | 12.83                      | 28.779          | 50.64         | 63.502        | n.a.   |
| 2   | n.a.      | 14.54                      | 28.048          | 49.36         | 55.059        | n.a.   |

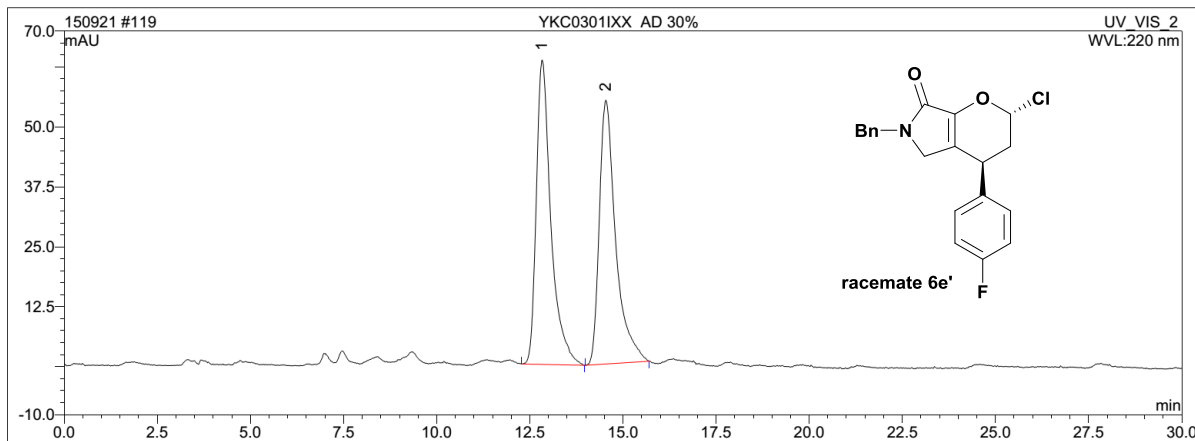

### Peak Analysis Report

| No. | Peak Name | Ret.Time (detected)<br>min | Area<br>mAU*min | Rel.Area<br>% | Height<br>mAU | Amount |
|-----|-----------|----------------------------|-----------------|---------------|---------------|--------|
| 1   | n.a.      | 12.89                      | 69.731          | 98.34         | 154.877       | n.a.   |
| 2   | n.a.      | 14.60                      | 1.179           | 1.66          | 3.162         | n.a.   |

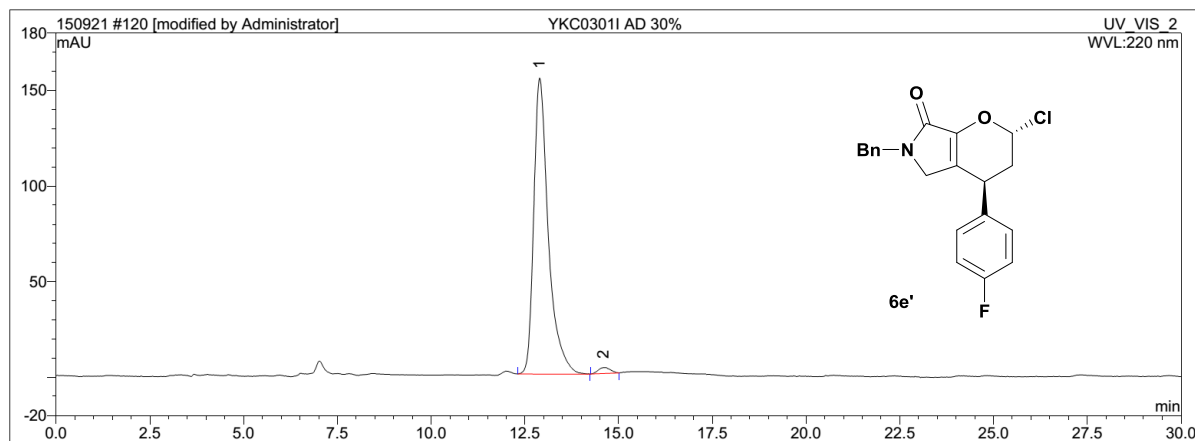



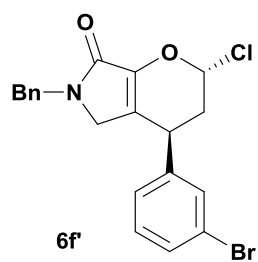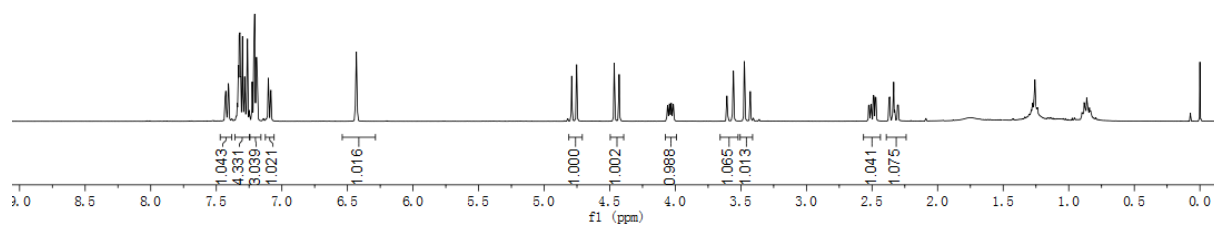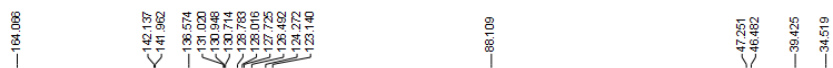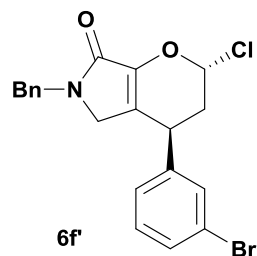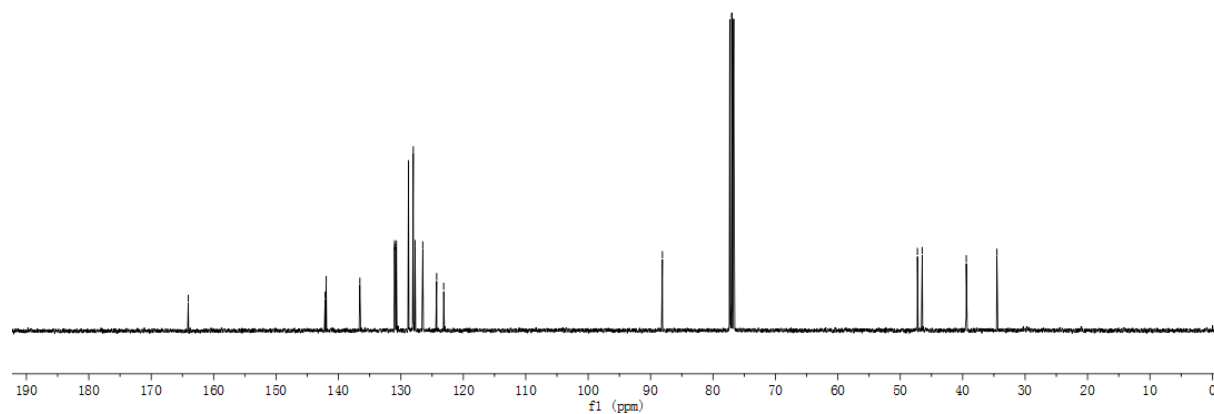

### Peak Analysis Report

| No. | Peak Name | Ret.Time (detected) | Area    | Rel.Area | Height | Amount |
|-----|-----------|---------------------|---------|----------|--------|--------|
|     |           | min                 | mAU*min | %        | mAU    |        |
| 1   | n.a.      | 13.31               | 23.058  | 50.41    | 50.524 | n.a.   |
| 2   | n.a.      | 15.70               | 22.684  | 49.59    | 40.345 | n.a.   |

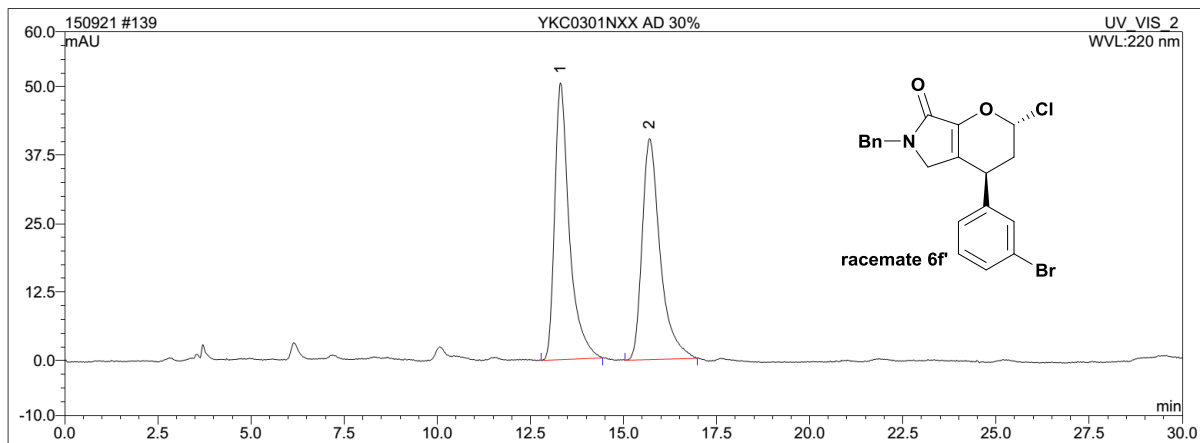

### Peak Analysis Report

| No. | Peak Name | Ret.Time (detected) | Area    | Rel.Area | Height  | Amount |
|-----|-----------|---------------------|---------|----------|---------|--------|
|     |           | min                 | mAU*min | %        | mAU     |        |
| 1   | n.a.      | 13.32               | 2.858   | 2.23     | 6.726   | n.a.   |
| 2   | n.a.      | 15.70               | 125.070 | 97.77    | 214.826 | n.a.   |

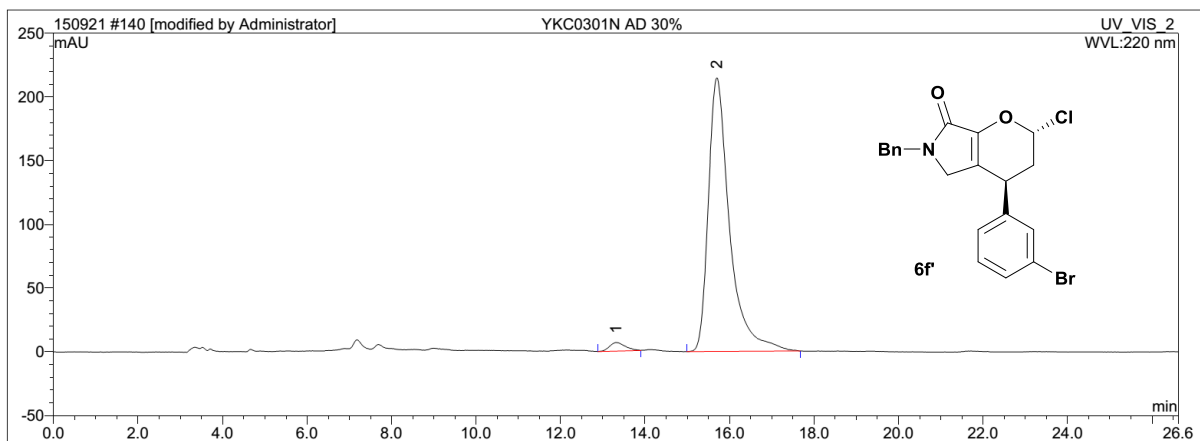

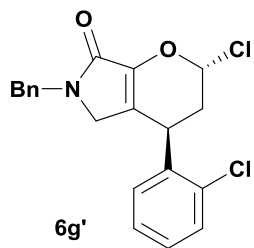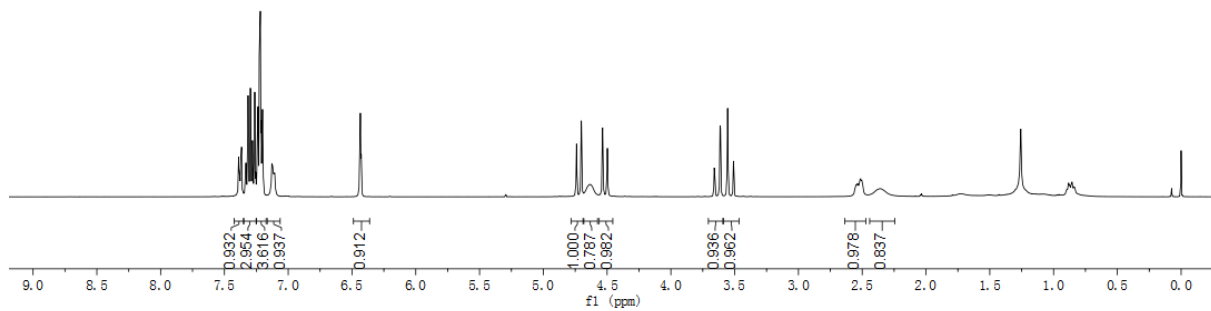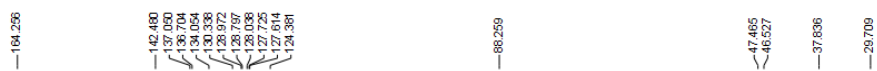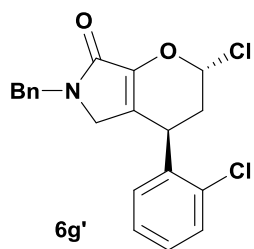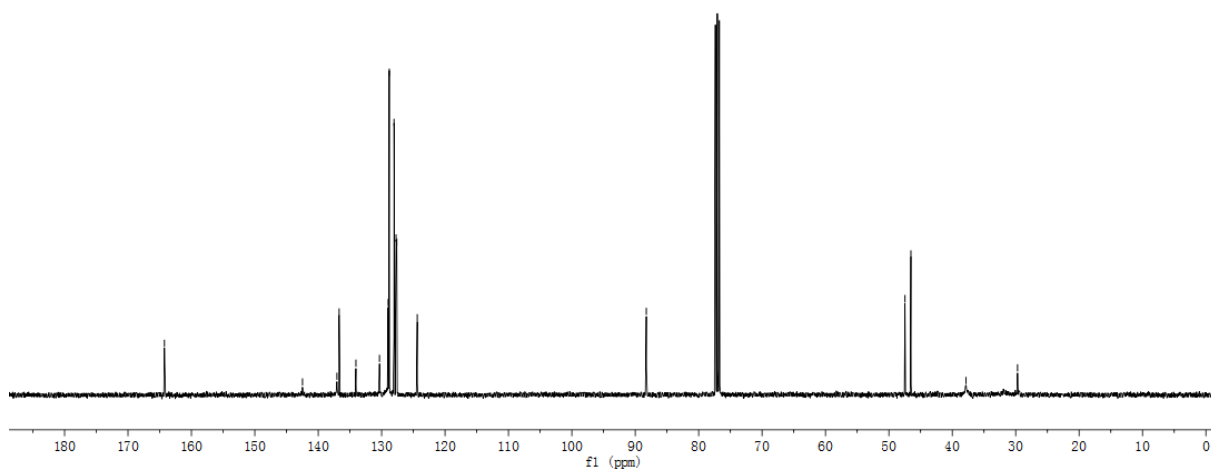

### Peak Analysis Report

| No. | Peak Name | Ret.Time (detected)<br>min | Area<br>mAU*min | Rel.Area<br>% | Height<br>mAU | Amount |
|-----|-----------|----------------------------|-----------------|---------------|---------------|--------|
| 1   | n.a.      | 13.00                      | 43.992          | 50.00         | 79.581        | n.a.   |
| 2   | n.a.      | 18.12                      | 43.997          | 50.00         | 56.322        | n.a.   |

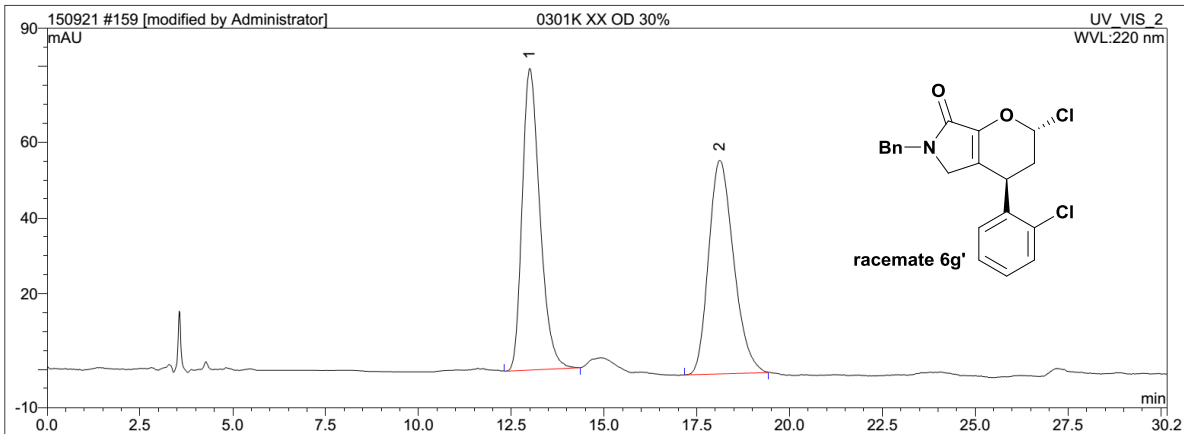

### Peak Analysis Report

| No. | Peak Name | Ret.Time (detected)<br>min | Area<br>mAU*min | Rel.Area<br>% | Height<br>mAU | Amount |
|-----|-----------|----------------------------|-----------------|---------------|---------------|--------|
| 1   | n.a.      | 12.99                      | 148.530         | 97.28         | 267.407       | n.a.   |
| 2   | n.a.      | 18.38                      | 4.146           | 2.72          | 5.801         | n.a.   |

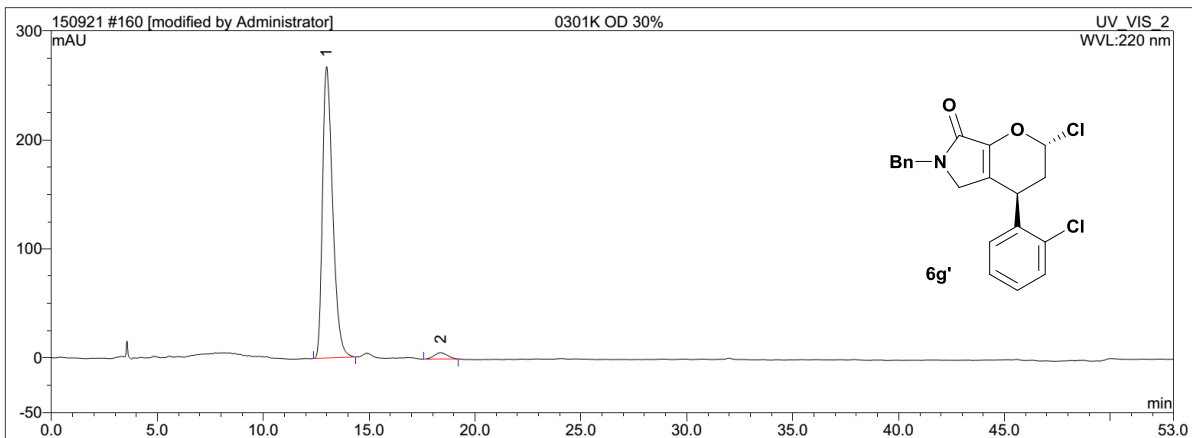

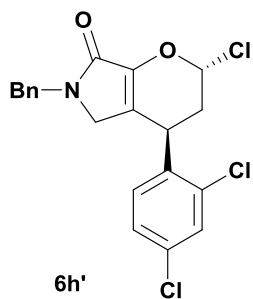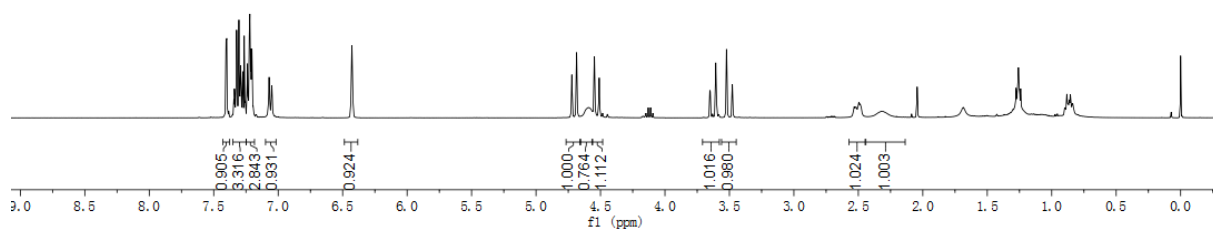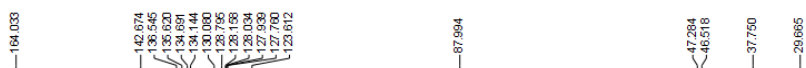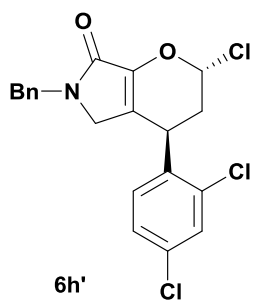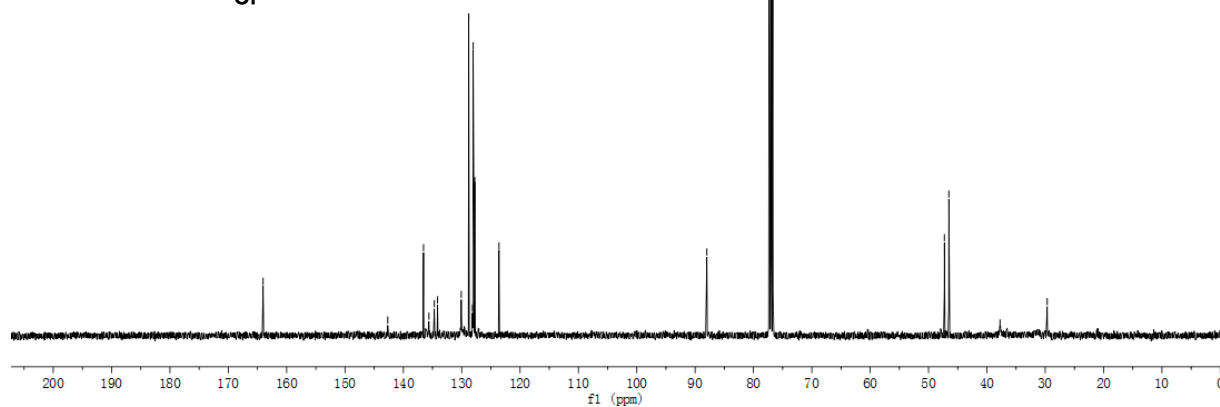

### Peak Analysis Report

| No. | Peak Name | Ret.Time (detected) | Area    | Rel.Area | Height | Amount |
|-----|-----------|---------------------|---------|----------|--------|--------|
|     |           | min                 | mAU*min | %        | mAU    |        |
| 1   | n.a.      | 11.93               | 14.096  | 51.58    | 32.150 | n.a.   |
| 2   | n.a.      | 17.52               | 13.235  | 48.42    | 21.654 | n.a.   |

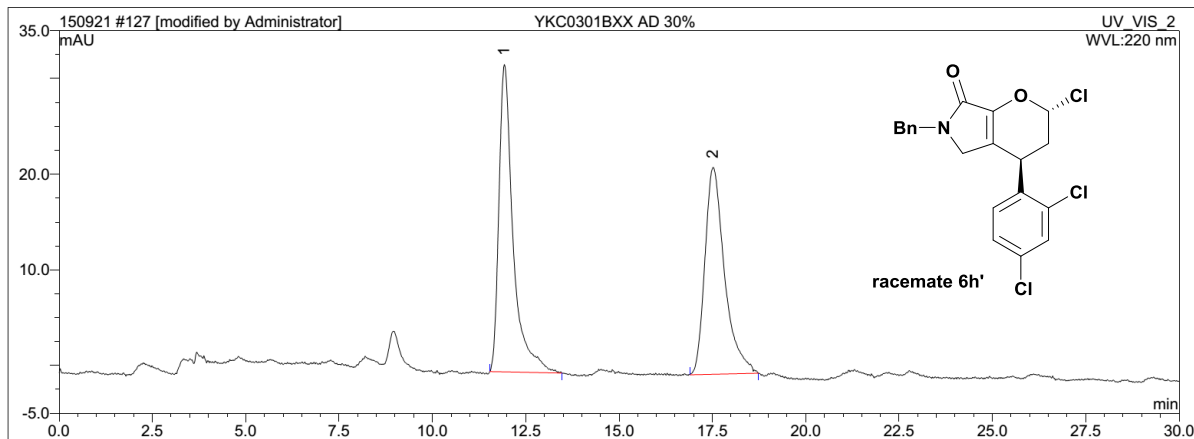

### Peak Analysis Report

| No. | Peak Name | Ret.Time (detected) | Area    | Rel.Area | Height  | Amount |
|-----|-----------|---------------------|---------|----------|---------|--------|
|     |           | min                 | mAU*min | %        | mAU     |        |
| 1   | n.a.      | 11.91               | 113.162 | 97.80    | 264.559 | n.a.   |
| 2   | n.a.      | 17.52               | 2.547   | 2.20     | 4.776   | n.a.   |

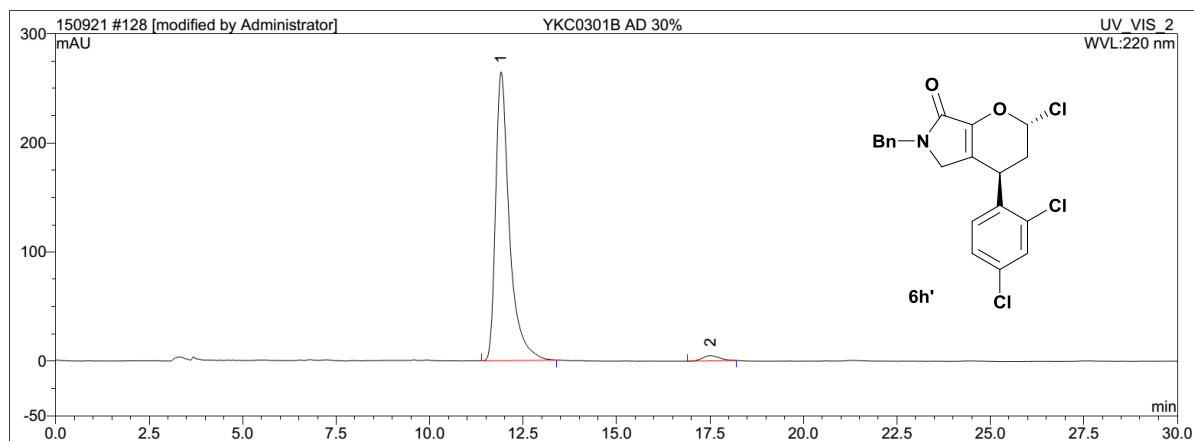

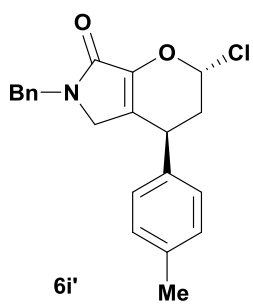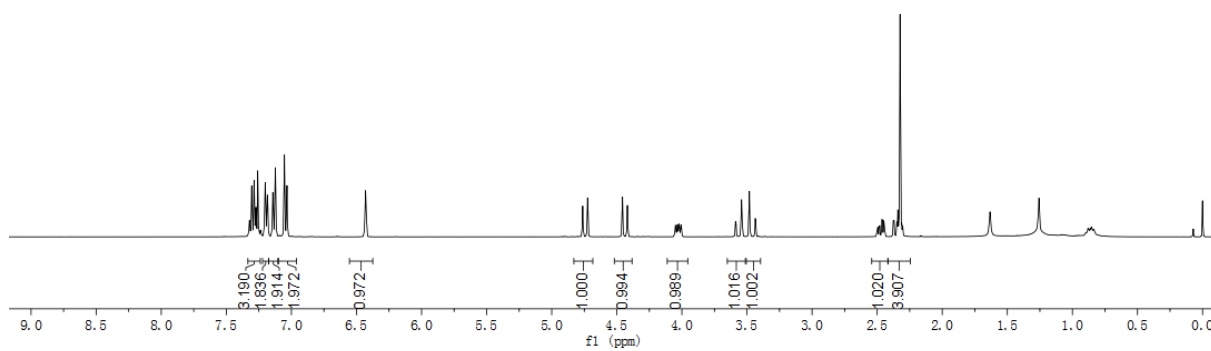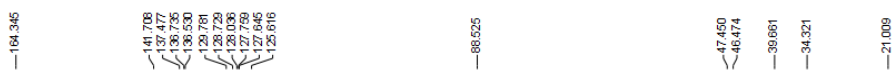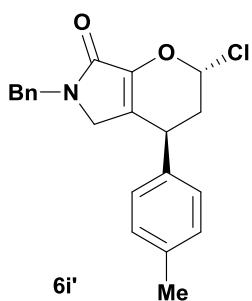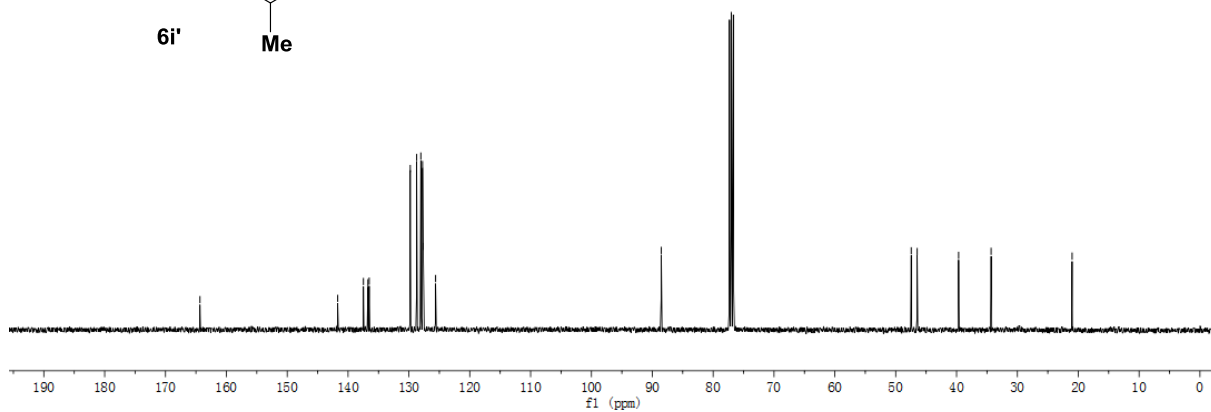

### Peak Analysis Report

| No. | Peak Name | Ret.Time (detected) | Area    | Rel.Area | Height  | Amount |
|-----|-----------|---------------------|---------|----------|---------|--------|
|     |           | min                 | mAU*min | %        | mAU     |        |
| 1   | n.a.      | 11.70               | 44.845  | 48.20    | 113.276 | n.a.   |
| 2   | n.a.      | 12.83               | 48.189  | 51.80    | 109.593 | n.a.   |

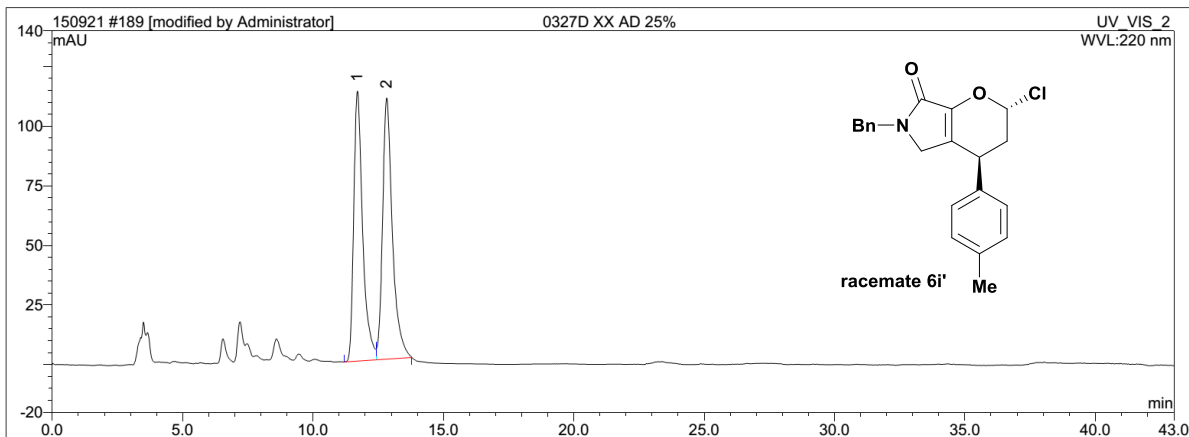

### Peak Analysis Report

| No. | Peak Name | Ret.Time (detected) | Area    | Rel.Area | Height   | Amount |
|-----|-----------|---------------------|---------|----------|----------|--------|
|     |           | min                 | mAU*min | %        | mAU      |        |
| 1   | n.a.      | 11.76               | 616.364 | 97.37    | 1497.797 | n.a.   |
| 2   | n.a.      | 12.88               | 16.675  | 2.63     | 41.349   | n.a.   |

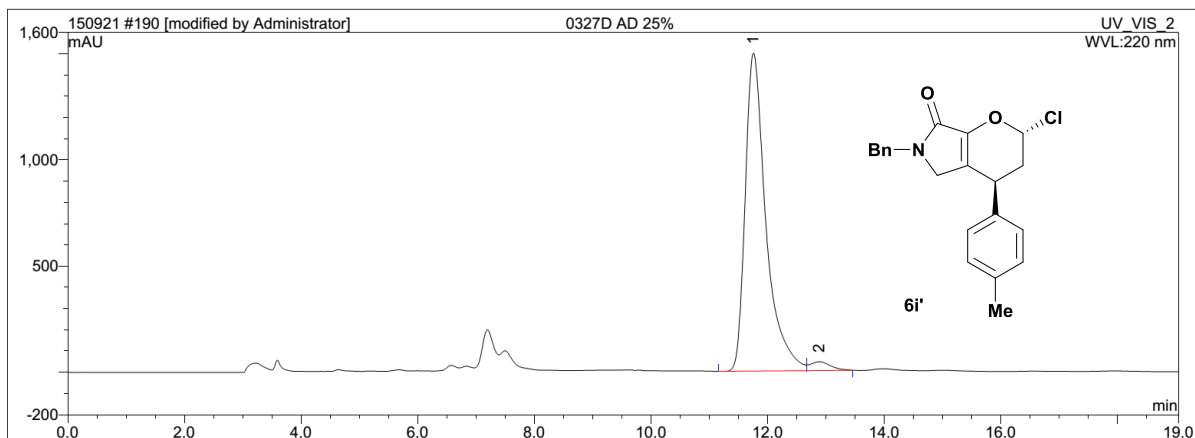



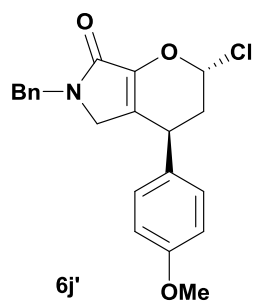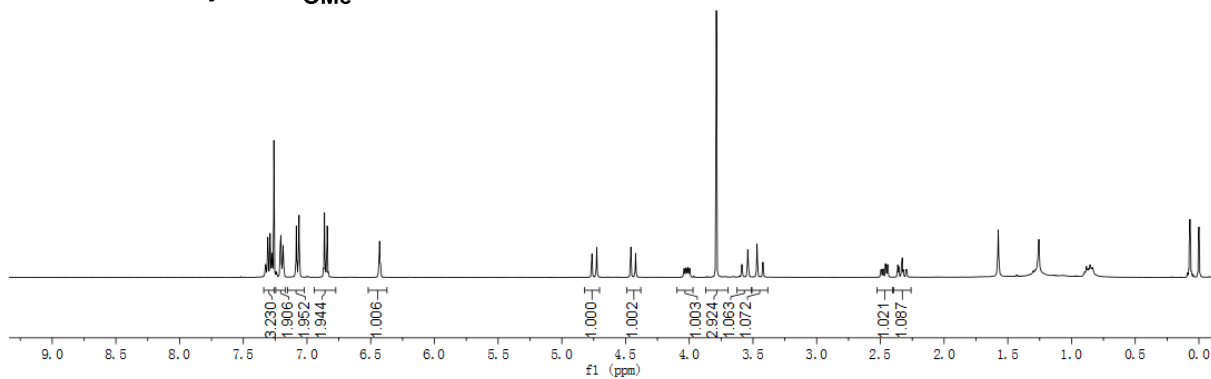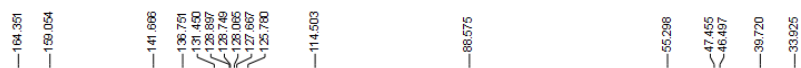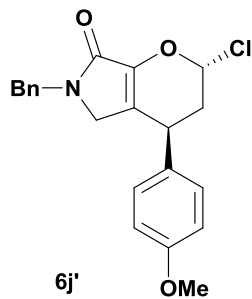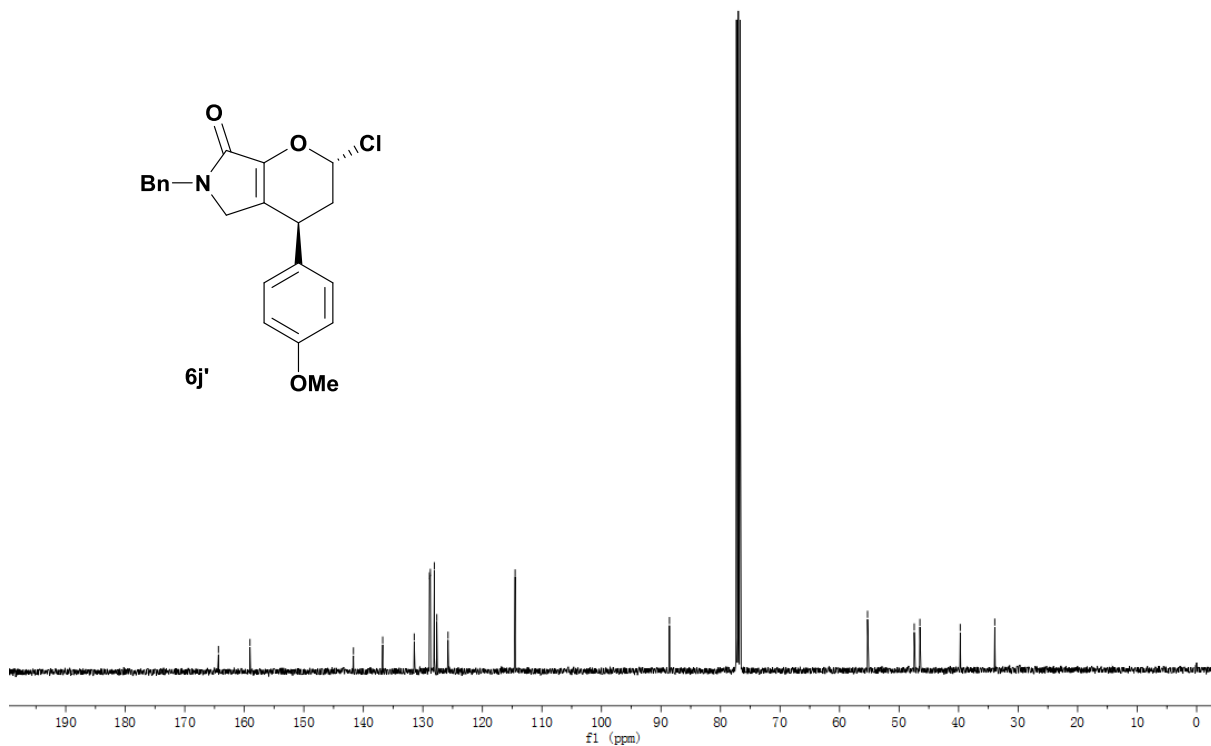

### Peak Analysis Report

| No. | Peak Name | Ret.Time (detected) | Area    | Rel.Area | Height  | Amount |
|-----|-----------|---------------------|---------|----------|---------|--------|
|     |           | min                 | mAU*min | %        | mAU     |        |
| 1   | n.a.      | 15.23               | 61.865  | 50.47    | 119.659 | n.a.   |
| 2   | n.a.      | 16.81               | 60.712  | 49.53    | 103.407 | n.a.   |

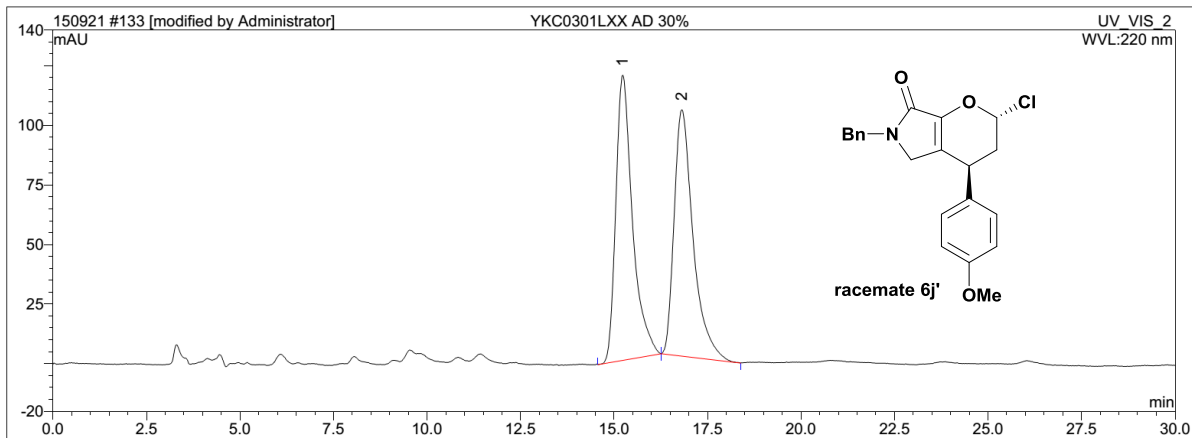

### Peak Analysis Report

| No. | Peak Name | Ret.Time (detected) | Area    | Rel.Area | Height  | Amount |
|-----|-----------|---------------------|---------|----------|---------|--------|
|     |           | min                 | mAU*min | %        | mAU     |        |
| 1   | n.a.      | 15.36               | 8.069   | 2.68     | 14.739  | n.a.   |
| 2   | n.a.      | 16.89               | 293.470 | 97.32    | 487.195 | n.a.   |

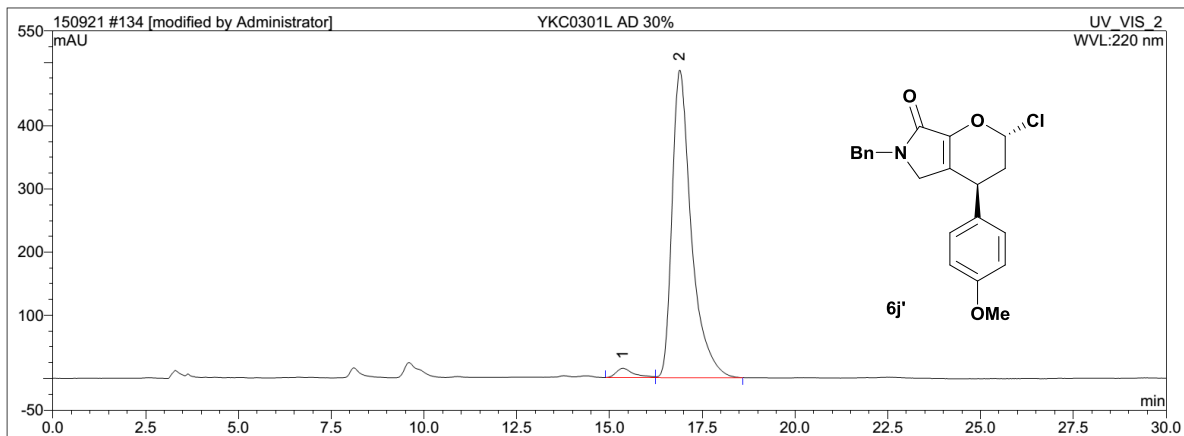

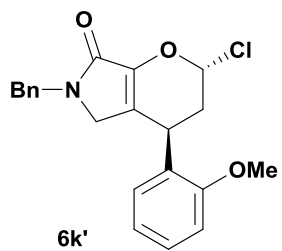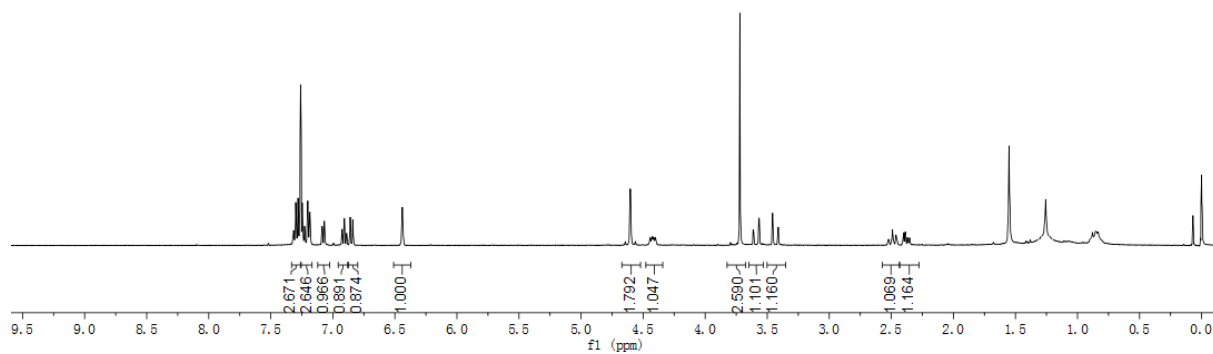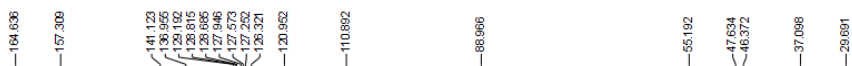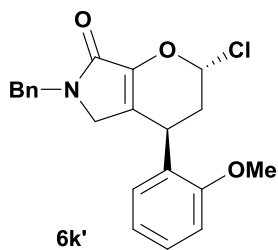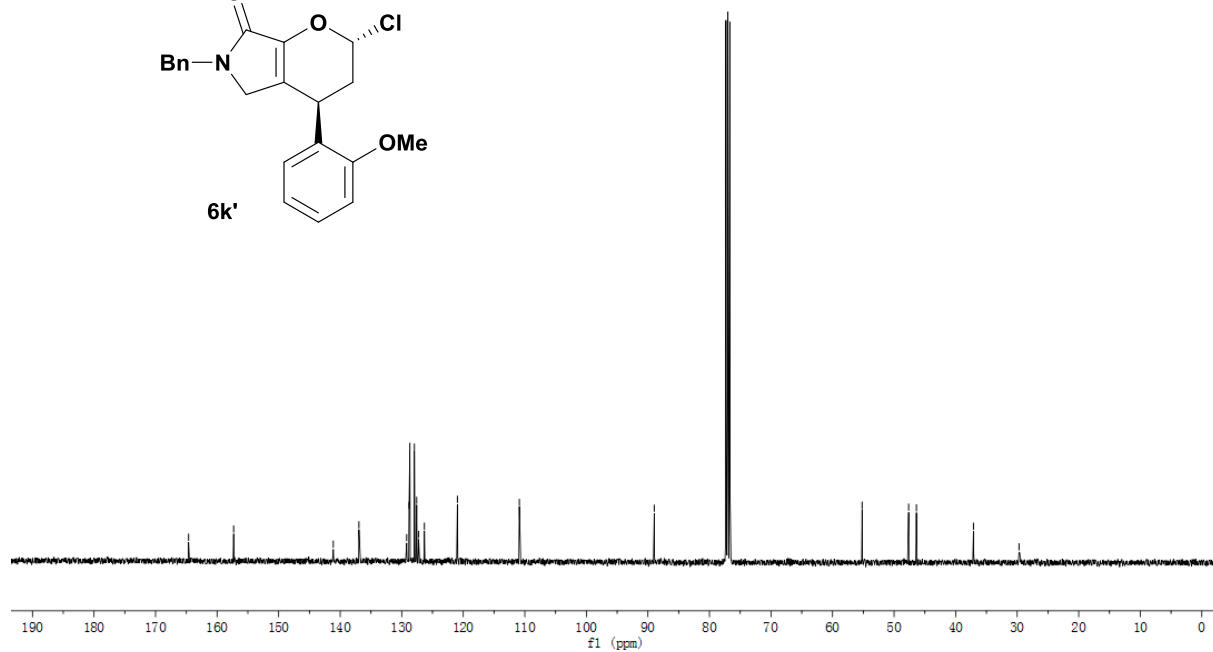

### Peak Analysis Report

| No. | Peak Name | Ret.Time (detected) | Area    | Rel.Area | Height  | Amount |
|-----|-----------|---------------------|---------|----------|---------|--------|
|     |           | min                 | mAU*min | %        | mAU     |        |
| 1   | n.a.      | 16.18               | 67.047  | 49.70    | 119.105 | n.a.   |
| 2   | n.a.      | 21.47               | 67.867  | 50.30    | 90.616  | n.a.   |

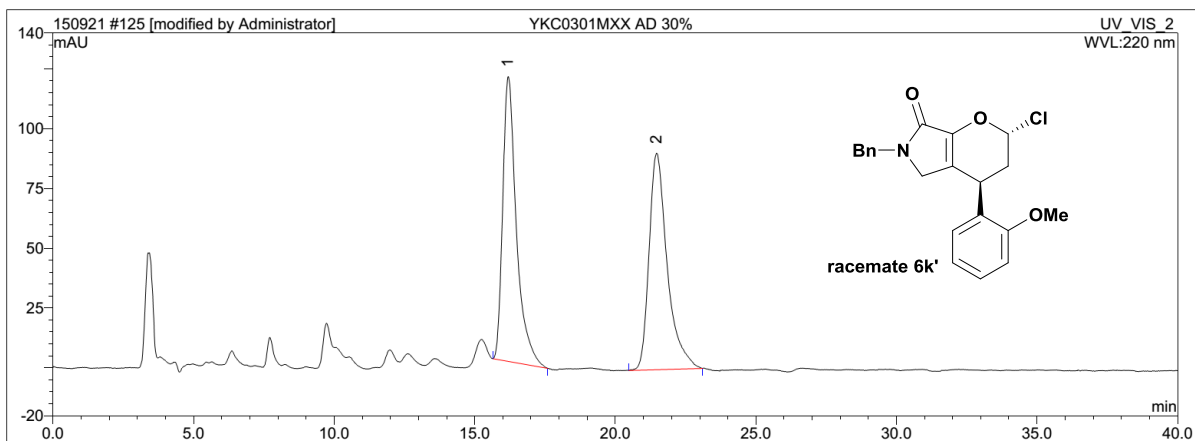

### Peak Analysis Report

| No. | Peak Name | Ret.Time (detected) | Area    | Rel.Area | Height  | Amount |
|-----|-----------|---------------------|---------|----------|---------|--------|
|     |           | min                 | mAU*min | %        | mAU     |        |
| 1   | n.a.      | 16.28               | 551.896 | 97.82    | 921.409 | n.a.   |
| 2   | n.a.      | 21.60               | 12.319  | 2.18     | 16.597  | n.a.   |

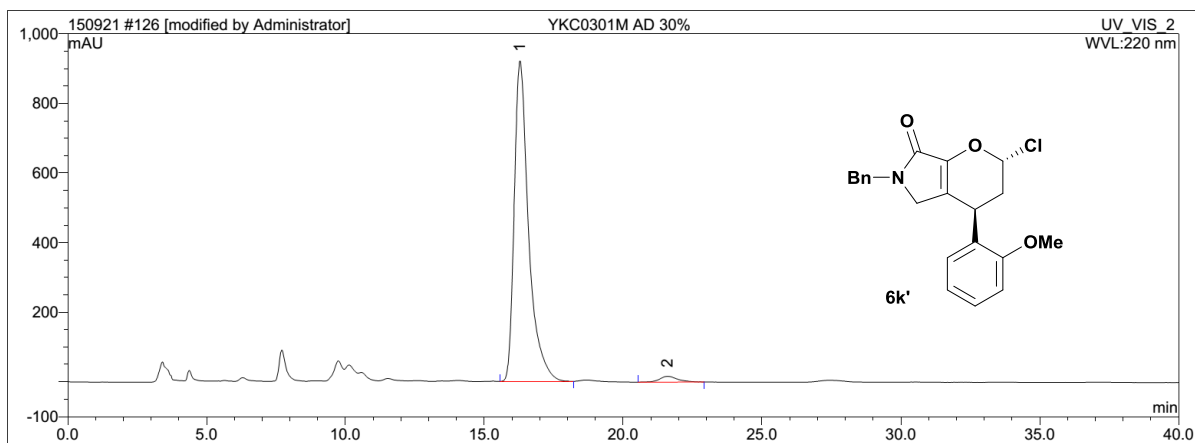

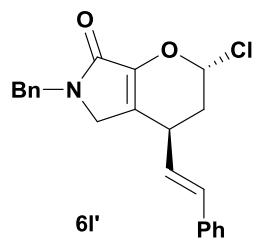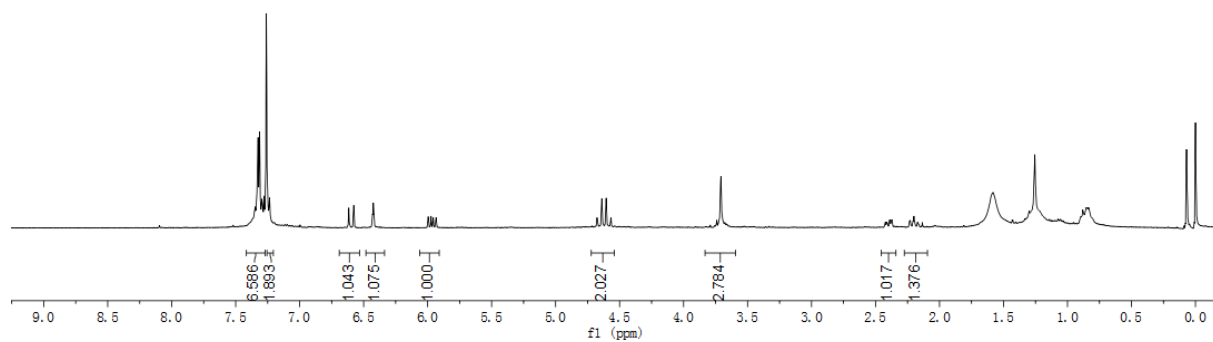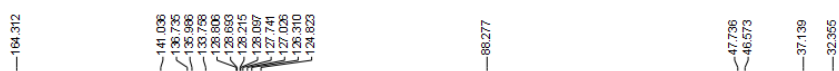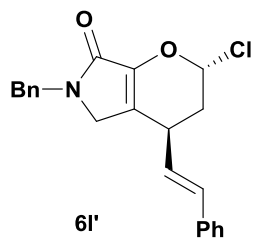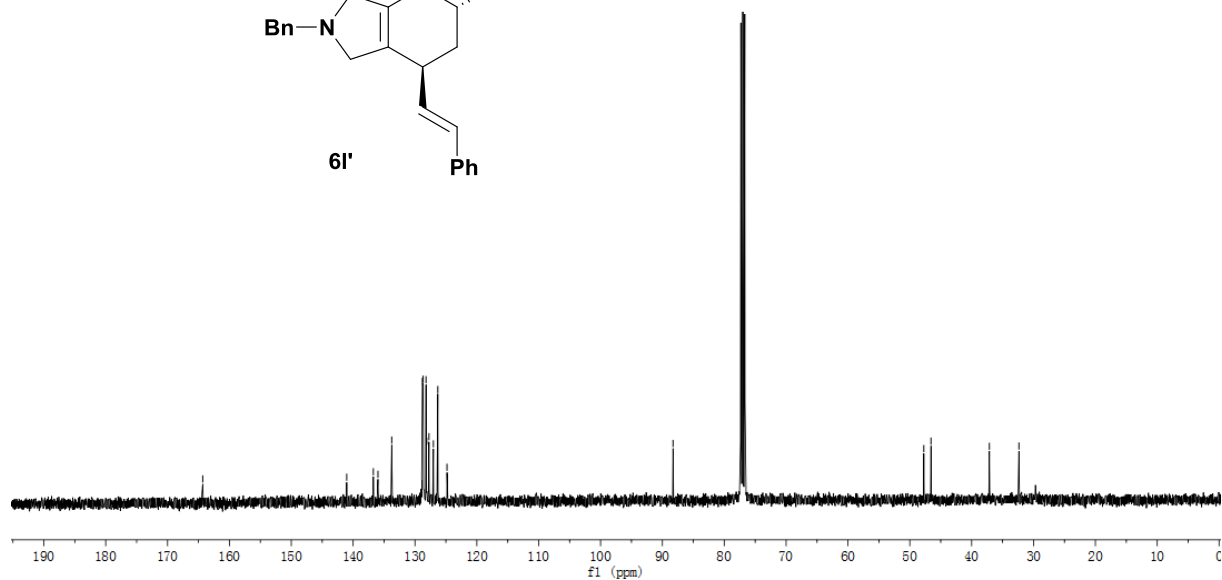

### Peak Analysis Report

| No. | Peak Name | Ret.Time (detected) | Area    | Rel.Area | Height  | Amount |
|-----|-----------|---------------------|---------|----------|---------|--------|
|     |           | min                 | mAU*min | %        | mAU     |        |
| 1   | n.a.      | 9.97                | 83.829  | 49.24    | 221.498 | n.a.   |
| 2   | n.a.      | 18.48               | 86.407  | 50.76    | 83.172  | n.a.   |

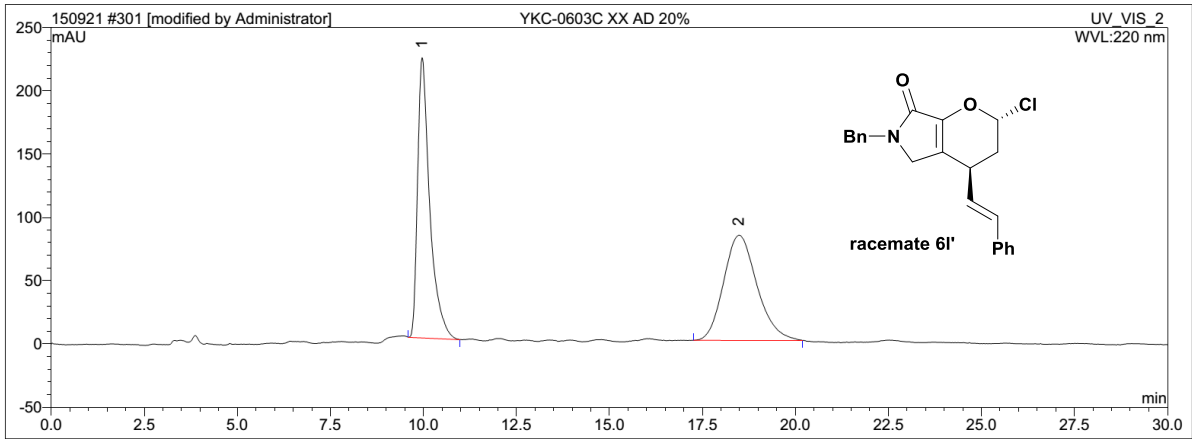

### Peak Analysis Report

| No. | Peak Name | Ret.Time (detected) | Area    | Rel.Area | Height  | Amount |
|-----|-----------|---------------------|---------|----------|---------|--------|
|     |           | min                 | mAU*min | %        | mAU     |        |
| 1   | n.a.      | 9.83                | 61.177  | 94.81    | 160.809 | n.a.   |
| 2   | n.a.      | 18.29               | 3.352   | 5.19     | 3.624   | n.a.   |

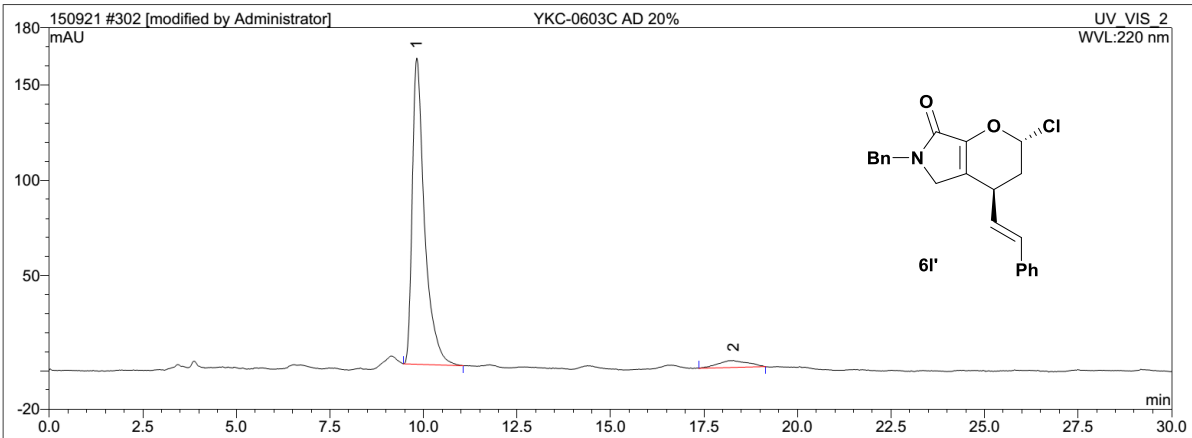

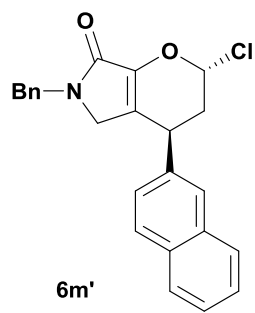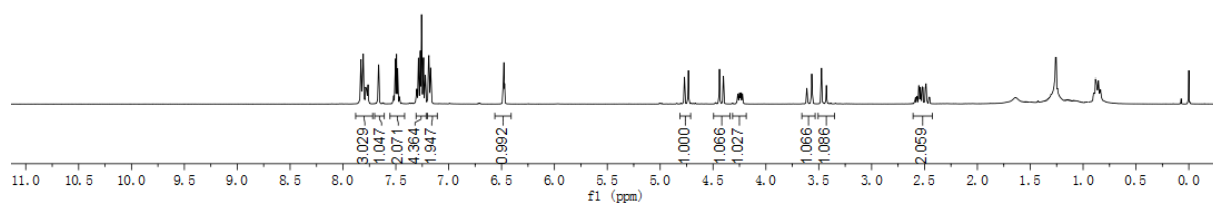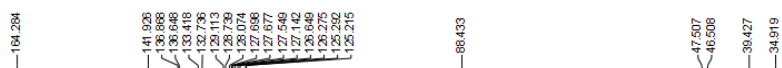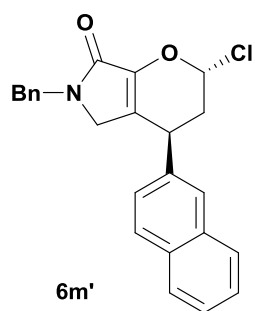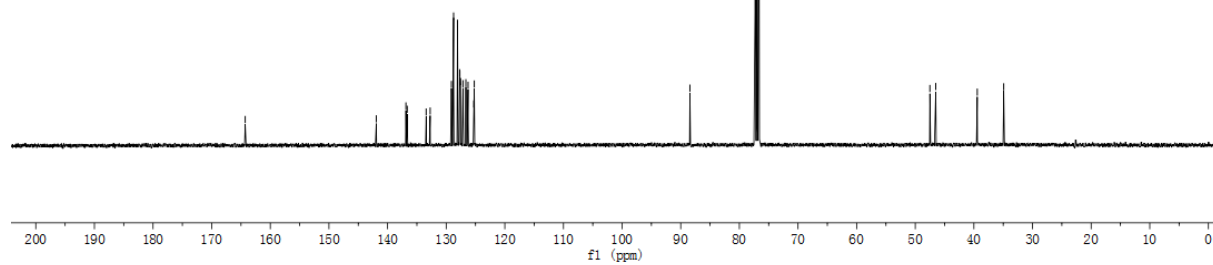

### Peak Analysis Report

| No. | Peak Name | Ret.Time (detected) | Area    | Rel.Area | Height  | Amount |
|-----|-----------|---------------------|---------|----------|---------|--------|
|     |           | min                 | mAU*min | %        | mAU     |        |
| 1   | n.a.      | 17.26               | 93.486  | 56.08    | 137.216 | n.a.   |
| 2   | n.a.      | 33.48               | 73.211  | 43.92    | 62.841  | n.a.   |

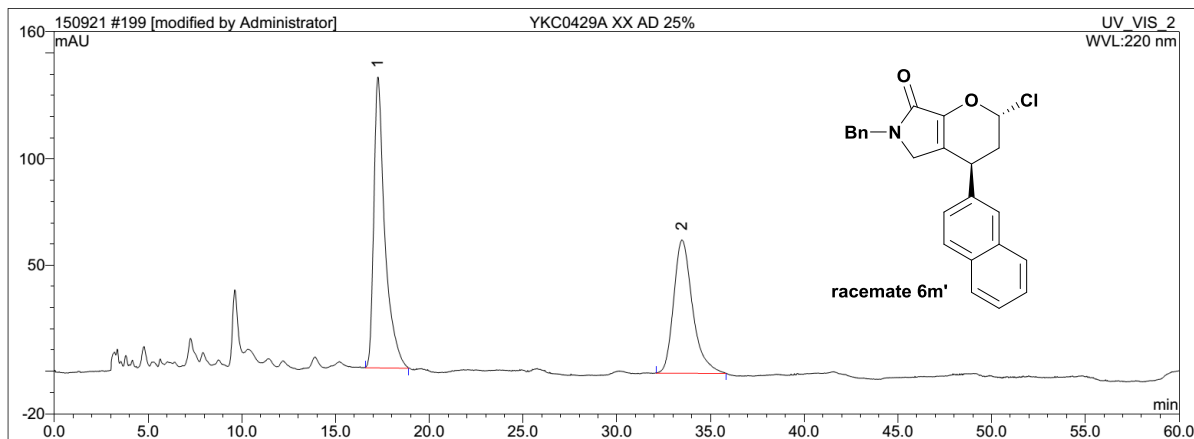

### Peak Analysis Report

| No. | Peak Name | Ret.Time (detected) | Area    | Rel.Area | Height  | Amount |
|-----|-----------|---------------------|---------|----------|---------|--------|
|     |           | min                 | mAU*min | %        | mAU     |        |
| 1   | n.a.      | 17.36               | 13.336  | 2.12     | 28.206  | n.a.   |
| 2   | n.a.      | 33.53               | 615.426 | 97.88    | 478.321 | n.a.   |

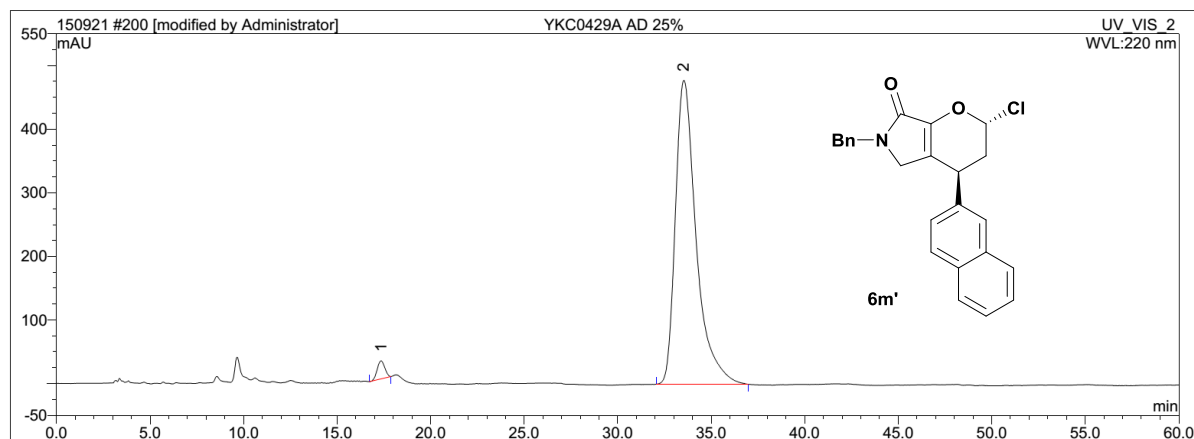



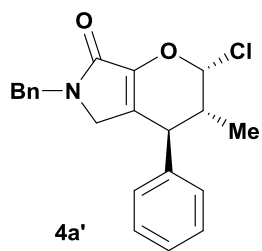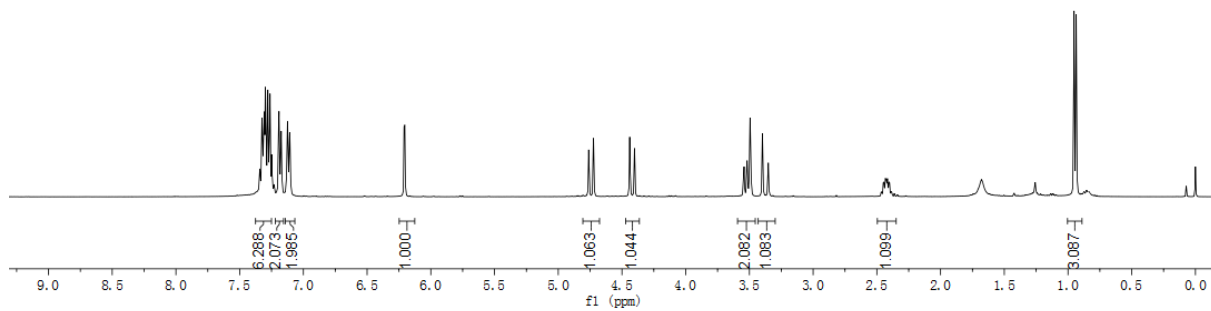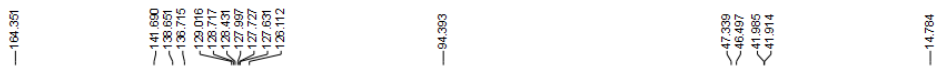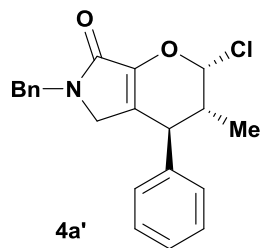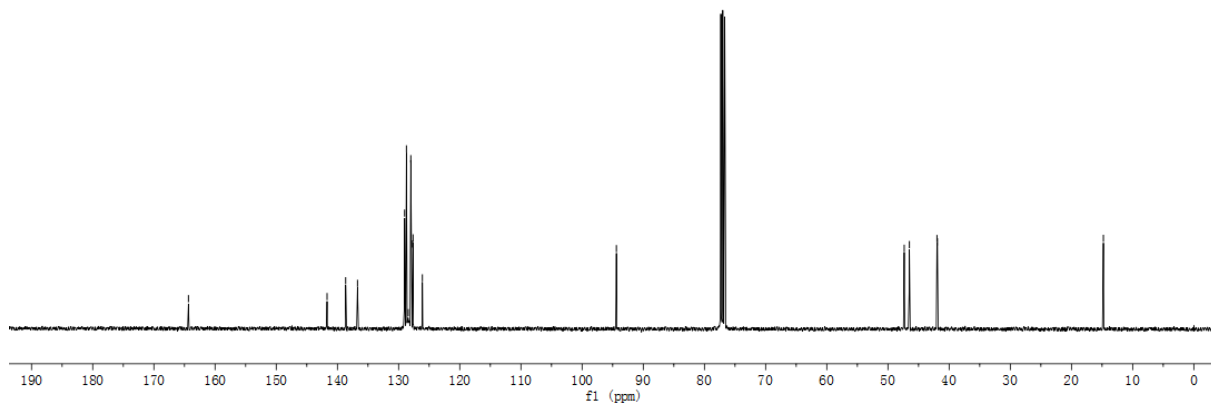

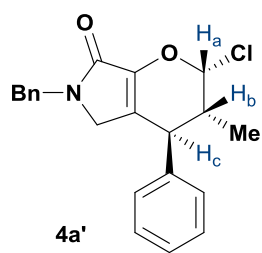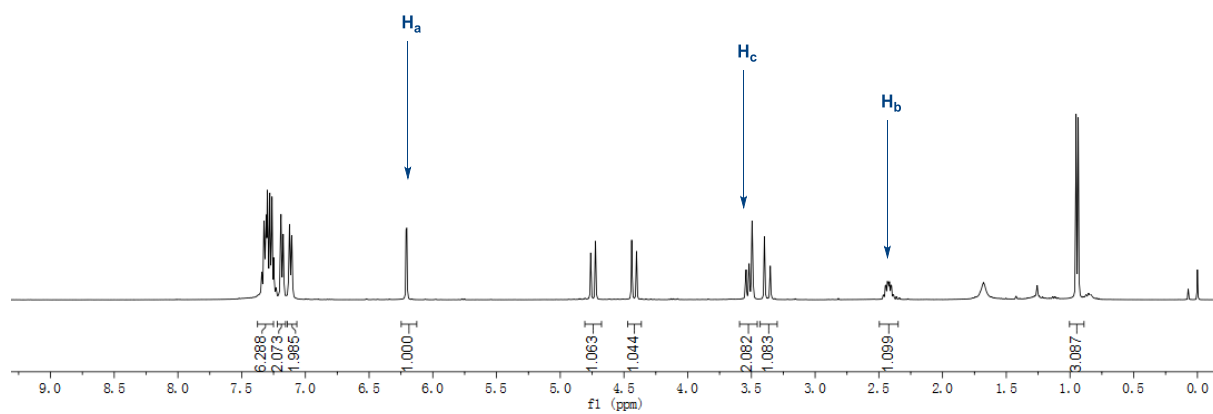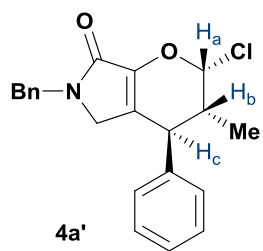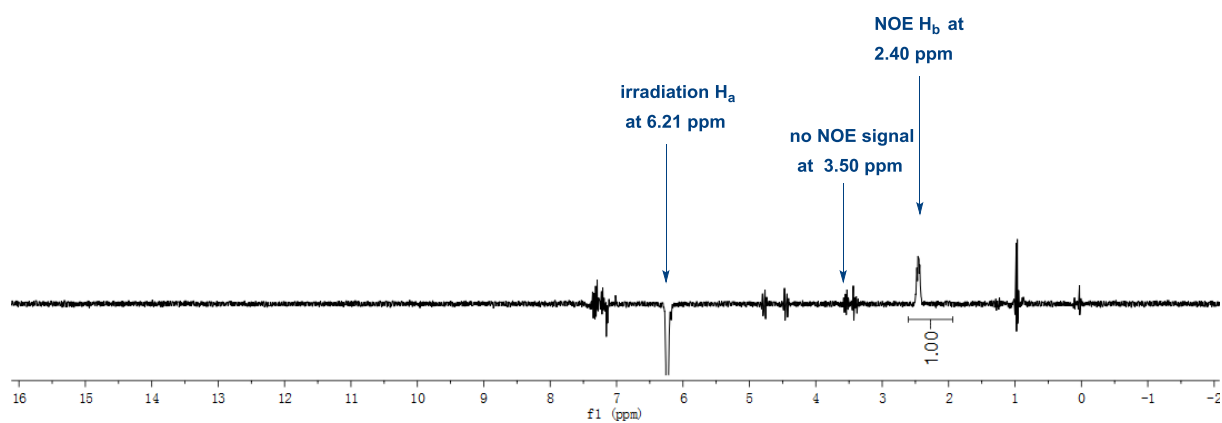

### Peak Analysis Report

| No. | Peak Name | Ret.Time (detected) | Area    | Rel.Area | Height  | Amount |
|-----|-----------|---------------------|---------|----------|---------|--------|
|     |           | min                 | mAU*min | %        | mAU     |        |
| 1   | n.a.      | 23.33               | 170.423 | 50.94    | 216.712 | n.a.   |
| 2   | n.a.      | 25.88               | 164.104 | 49.06    | 193.056 | n.a.   |

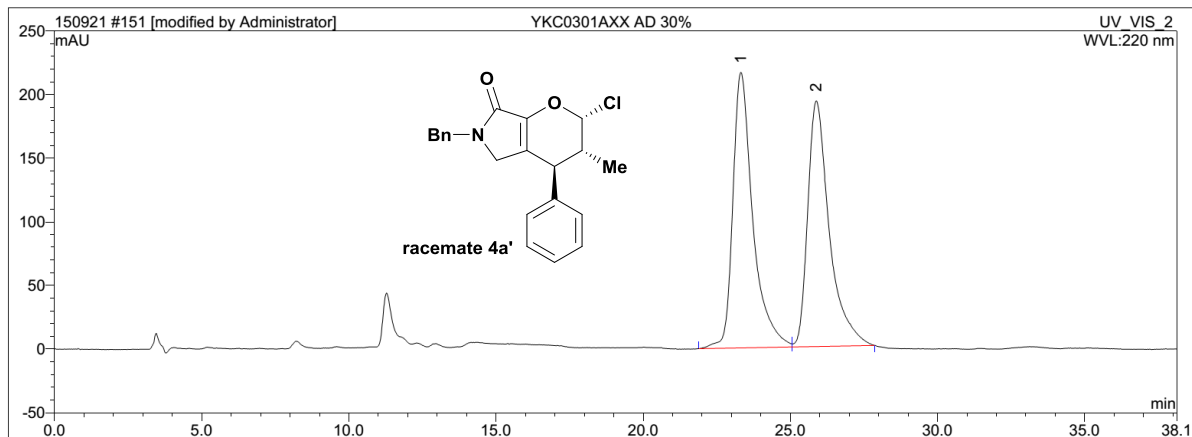

### Peak Analysis Report

| No. | Peak Name | Ret.Time (detected) | Area    | Rel.Area | Height  | Amount |
|-----|-----------|---------------------|---------|----------|---------|--------|
|     |           | min                 | mAU*min | %        | mAU     |        |
| 1   | n.a.      | 23.32               | 156.207 | 99.41    | 201.097 | n.a.   |
| 2   | n.a.      | 25.87               | 0.920   | 0.59     | 1.311   | n.a.   |

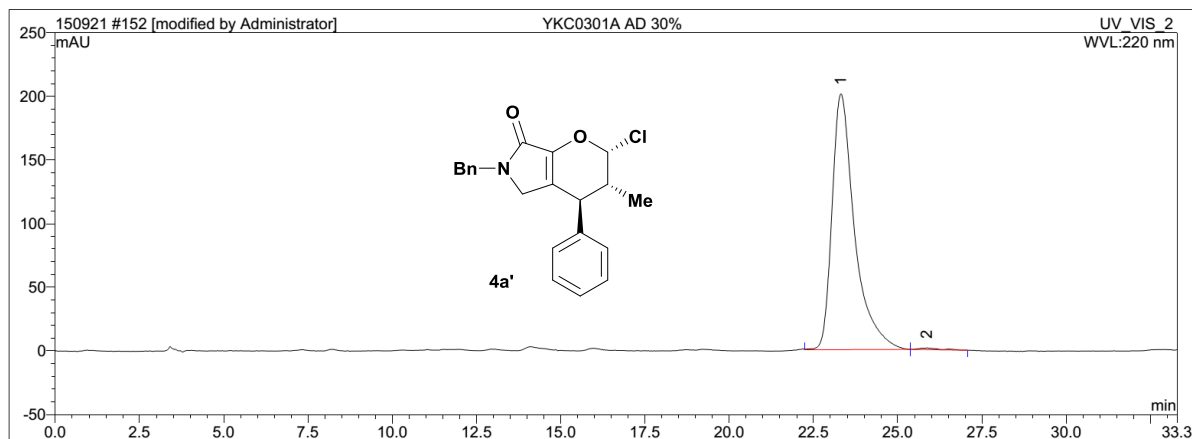

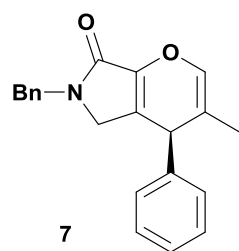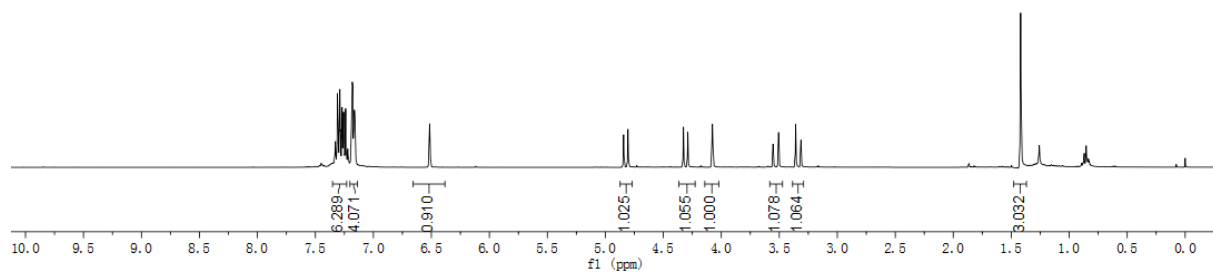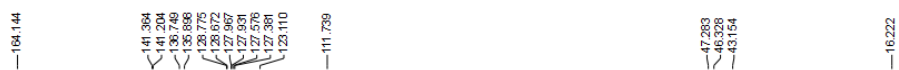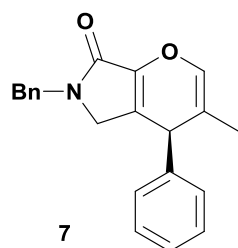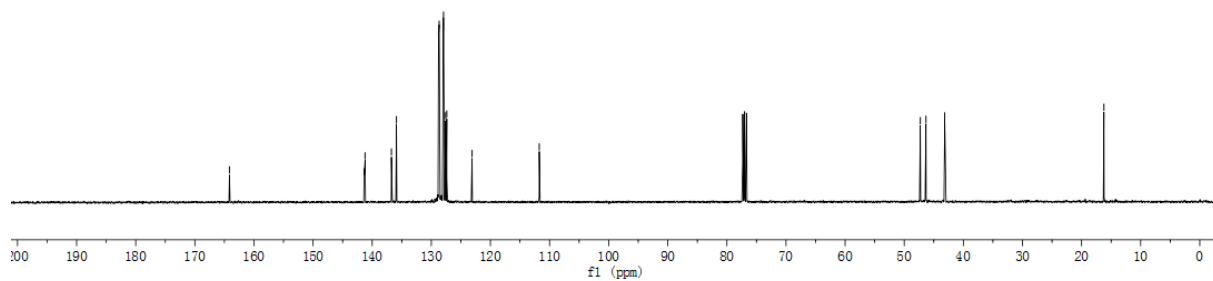

### Peak Analysis Report

| No. | Peak Name | Ret. Time (detected)<br>min | Area<br>mAU*min | Rel. Area<br>% | Height<br>mAU | Amount |
|-----|-----------|-----------------------------|-----------------|----------------|---------------|--------|
| 1   | n.a.      | 16.66                       | 46.973          | 52.38          | 89.026        | n.a.   |
| 2   | n.a.      | 36.28                       | 42.711          | 47.62          | 38.931        | n.a.   |

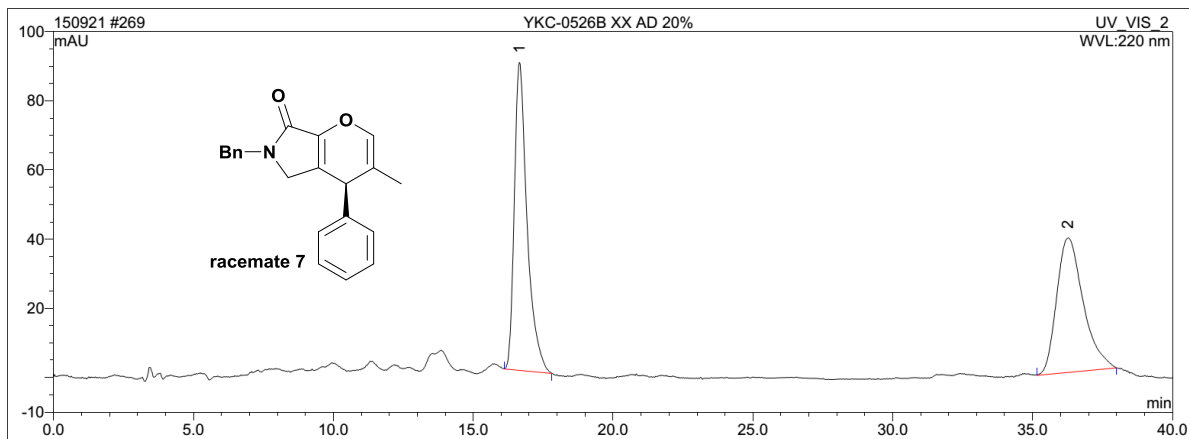

### Peak Analysis Report

| No. | Peak Name | Ret. Time (detected)<br>min | Area<br>mAU*min | Rel. Area<br>% | Height<br>mAU | Amount |
|-----|-----------|-----------------------------|-----------------|----------------|---------------|--------|
| 1   | n.a.      | 16.47                       | 256.309         | 99.26          | 443.999       | n.a.   |
| 2   | n.a.      | 35.97                       | 1.900           | 0.74           | 2.700         | n.a.   |

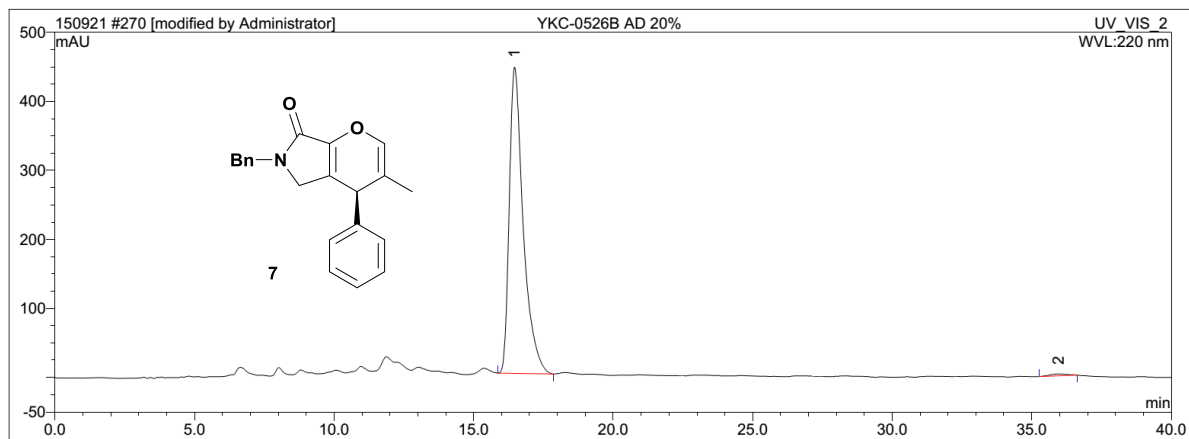

Supplement: c6cc05001h1.pdf [file c6cc05001h1.pdf]
